# Supplementary material for: Comparison of Attenuated Total Reflectance Mid-Infrared, Near Infrared, and 1H-Nuclear Magnetic Resonance Spectroscopies for the Determination of Coffee's Geographical Origin
Source: Int J Anal Chem. 2017 Nov 1;2017:7210463. doi: 10.1155/2017/7210463 (PMC5672123; doi:10.1155/2017/7210463)
Supplement: Supplementary file 1 — The supplementary material contains the original spectra and the necessary R scripts, as a zip file, to reproduce the results presented in this manuscript. [file 7210463.f1.zip]

Archive with 11 entries (9 files):
- coffee-profiler-master/
- coffee-profiler-master/LICENSE
- coffee-profiler-master/README.md
- coffee-profiler-master/data/
- coffee-profiler-master/data/NIRSamples.csv
- coffee-profiler-master/data/NIRscale.csv
- coffee-profiler-master/data/NIRspectra.csv
- coffee-profiler-master/data/dataNMR.rda
- coffee-profiler-master/data/mIRspectra.csv
- coffee-profiler-master/data/metadata.csv
- coffee-profiler-master/finalComparatore.R
