# Supplementary material for: Comparison of Attenuated Total Reflectance Mid-Infrared, Near Infrared, and 1H-Nuclear Magnetic Resonance Spectroscopies for the Determination of Coffee's Geographical Origin
Source: Int J Anal Chem. 2017 Nov 1;2017:7210463. doi: 10.1155/2017/7210463 (PMC5672123; doi:10.1155/2017/7210463)
Supplement: Supplementary file 1 — The supplementary material contains the original spectra and the necessary R scripts, as a zip file, to reproduce the results presented in this manuscript. [file 7210463.f1.zip › coffee-profiler-master/data/metadata.csv]

ID	dateReception	name	country	department	city	species	composition	presentation	beneficioType	caffeine	comments	aroma	flavor	afterTaste	acidity	body	balance	uniformity	cleanCup	sweetness	overall	totalScore	descriptor1 (aroma-fragance)	descriptor2 (aroma-fragance)	descriptor1 (afterTaste)	descriptor2 (afterTaste)	Notes	altitude	area	cultivatedArea	variety	age	laborType	soilType	precipitation	fertilizer	fertilizerType	fertilizerAmount	shadow	arvenses	numberArvenses	plagues	waterSource	recollectionTime	beneficio	fermentationType	drying	dryingTime	certification
AC1160	Feb 2012	Rove100-14	India	NA	NA	Robusta	100	tostado molido y verde molido	unknown	0	Parchment
AC1160	Feb 2012	Rove100-14	India	NA	NA	Robusta	100	tostado molido y verde molido	unknown	0	Parchment
AC1160	Feb 2012	Rove100-14	India	NA	NA	Robusta	100	tostado molido y verde molido	unknown	0	Parchment
AC1161	Feb 2012	Rove100-15	Indonesia	NA	NA	Robusta	100	tostado molido y verde molido	unknown	0
AC1161	Feb 2012	Rove100-15	Indonesia	NA	NA	Robusta	100	tostado molido y verde molido	unknown	0
AC1161	Feb 2012	Rove100-15	Indonesia	NA	NA	Robusta	100	tostado molido y verde molido	unknown	0
AC1162	Feb 2012	Rove100-16	Vietnam	NA	NA	Robusta	100	tostado molido y verde molido	unknown	0	Washed
AC1162	Feb 2012	Rove100-16	Vietnam	NA	NA	Robusta	100	tostado molido y verde molido	unknown	0	Washed
AC1162	Feb 2012	Rove100-16	Vietnam	NA	NA	Robusta	100	tostado molido y verde molido	unknown	0	Washed
AC1163	Feb 2012	Rove100-17	Vietnam	NA	NA	Robusta	100	tostado molido y verde molido	unknown	0	Polished
AC1163	Feb 2012	Rove100-17	Vietnam	NA	NA	Robusta	100	tostado molido y verde molido	unknown	0	Polished
AC1163	Feb 2012	Rove100-17	Vietnam	NA	NA	Robusta	100	tostado molido y verde molido	unknown	0	Polished
AC1164	Feb 2012	Rove100-18	Indonesia	NA	NA	Robusta	100	tostado molido y verde molido	unknown	0
AC1164	Feb 2012	Rove100-18	Indonesia	NA	NA	Robusta	100	tostado molido y verde molido	unknown	0
AC1164	Feb 2012	Rove100-18	Indonesia	NA	NA	Robusta	100	tostado molido y verde molido	unknown	0
AC1168	Mar 2012	TPAAH12002	Colombia	Tolima	Ibague	100% ARABICA COLOMBIA	0	tostado molido y verde molido	h	0	Centro:Ibague, Palocabildo Tolima, Almendra especial	4.5	4.5	4.5	4.5	4.5	4.5	5.0	4.5	4.5	4.5	45.5	Chocolate amargo,Suave,Amargo,Amargo,
AC1168	Mar 2012	TPAAH12002	Colombia	Tolima	Ibague	100% ARABICA COLOMBIA	0	tostado molido y verde molido	h	0	Centro:Ibague, Palocabildo Tolima, Almendra especial	4.5	4.5	4.5	4.5	4.5	4.5	5.0	4.5	4.5	4.5	45.5	Chocolate amargo,Suave,Amargo,Amargo,
AC1168	Mar 2012	TPAAH12002	Colombia	Tolima	Ibague	100% ARABICA COLOMBIA	0	tostado molido y verde molido	h	0	Centro:Ibague, Palocabildo Tolima, Almendra especial	4.5	4.5	4.5	4.5	4.5	4.5	5.0	4.5	4.5	4.5	45.5	Chocolate amargo,Suave,Amargo,Amargo,
AC1169	Mar 2012	TGAAH12004	Colombia	Tolima	Ibague	100% ARABICA COLOMBIA	0	tostado molido y verde molido	h	0	Centro:Ibague, Gaitania Tolima, Almendra especial	5.0	5.0	5.0	5.0	4.5	5.0	4.0	4.5	5.5	4.5	48.0	Frutal,Dulce,Frutal,Amargo,Frutal,
AC1169	Mar 2012	TGAAH12004	Colombia	Tolima	Ibague	100% ARABICA COLOMBIA	0	tostado molido y verde molido	h	0	Centro:Ibague, Gaitania Tolima, Almendra especial	5.0	5.0	5.0	5.0	4.5	5.0	4.0	4.5	5.5	4.5	48.0	Frutal,Dulce,Frutal,Amargo,Frutal,
AC1169	Mar 2012	TGAAH12004	Colombia	Tolima	Ibague	100% ARABICA COLOMBIA	0	tostado molido y verde molido	h	0	Centro:Ibague, Gaitania Tolima, Almendra especial	5.0	5.0	5.0	5.0	4.5	5.0	4.0	4.5	5.5	4.5	48.0	Frutal,Dulce,Frutal,Amargo,Frutal,
AC1170	Mar 2012	TCHAH12003	Colombia	Tolima	Ibague	100% ARABICA COLOMBIA	0	tostado molido y verde molido	h	0	Centro:Ibague, Chaparral Tolima, Almendra especial	5.0	6.0	6.0	6.5	6.0	6.5	7.0	6.5	6.0	6.5	62.0	Chocolate amargo,Cereal,Suave,Dulce,Suave,
AC1170	Mar 2012	TCHAH12003	Colombia	Tolima	Ibague	100% ARABICA COLOMBIA	0	tostado molido y verde molido	h	0	Centro:Ibague, Chaparral Tolima, Almendra especial	5.0	6.0	6.0	6.5	6.0	6.5	7.0	6.5	6.0	6.5	62.0	Chocolate amargo,Cereal,Suave,Dulce,Suave,
AC1170	Mar 2012	TCHAH12003	Colombia	Tolima	Ibague	100% ARABICA COLOMBIA	0	tostado molido y verde molido	h	0	Centro:Ibague, Chaparral Tolima, Almendra especial	5.0	6.0	6.0	6.5	6.0	6.5	7.0	6.5	6.0	6.5	62.0	Chocolate amargo,Cereal,Suave,Dulce,Suave,
AC1171	Mar 2012	TICOAH12008	Colombia	Tolima	Ibague	100% ARABICA COLOMBIA	0	tostado molido y verde molido	h	0	Centro:Ibague, Icononzo Tolima, Almendra estandar	4.0	6.0	6.0	6.0	6.0	6.5	7.0	6.0	6.5	7.0	61.0	Carbonoso,Herbal,Dulce,Floral,Dulce,Floral,
AC1171	Mar 2012	TICOAH12008	Colombia	Tolima	Ibague	100% ARABICA COLOMBIA	0	tostado molido y verde molido	h	0	Centro:Ibague, Icononzo Tolima, Almendra estandar	4.0	6.0	6.0	6.0	6.0	6.5	7.0	6.0	6.5	7.0	61.0	Carbonoso,Herbal,Dulce,Floral,Dulce,Floral,
AC1171	Mar 2012	TICOAH12008	Colombia	Tolima	Ibague	100% ARABICA COLOMBIA	0	tostado molido y verde molido	h	0	Centro:Ibague, Icononzo Tolima, Almendra estandar	4.0	6.0	6.0	6.0	6.0	6.5	7.0	6.0	6.5	7.0	61.0	Carbonoso,Herbal,Dulce,Floral,Dulce,Floral,
AC1198	290312	BRAAS12062	Brazil	NA	NA	Arabica	0	verde molido y tostado molido fino	s	0	Alfenas, beneficio seco	3.5	3.5	3.5	4.0	4.0	4.0	5.0	4.0	4.0	4.0	39.5	Cereal,Chocolate amargo,Cereal,Amargo,Astringente,Amargo,
AC1198	290312	BRAAS12062	Brazil	NA	NA	Arabica	0	verde molido y tostado molido fino	s	0	Alfenas, beneficio seco	3.5	3.5	3.5	4.0	4.0	4.0	5.0	4.0	4.0	4.0	39.5	Cereal,Chocolate amargo,Cereal,Amargo,Astringente,Amargo,
AC1198	290312	BRAAS12062	Brazil	NA	NA	Arabica	0	verde molido y tostado molido fino	s	0	Alfenas, beneficio seco	3.5	3.5	3.5	4.0	4.0	4.0	5.0	4.0	4.0	4.0	39.5	Cereal,Chocolate amargo,Cereal,Amargo,Astringente,Amargo,
AC1199	290312	HACAH12052	Colombia	Huila	Acevedo	100% ARABICA COLOMBIA	0	tostado molido y verde molido	h	0	Neiva	5.0	5.0	4.5	5.0	4.5	4.5	5.0	4.5	5.0	4.5	47.5	Chocolate dulce,Astringente,Herbal,Amargo,
AC1199	290312	HACAH12052	Colombia	Huila	Acevedo	100% ARABICA COLOMBIA	0	tostado molido y verde molido	h	0	Neiva	5.0	5.0	4.5	5.0	4.5	4.5	5.0	4.5	5.0	4.5	47.5	Chocolate dulce,Astringente,Herbal,Amargo,
AC1199	290312	HACAH12052	Colombia	Huila	Acevedo	100% ARABICA COLOMBIA	0	tostado molido y verde molido	h	0	Neiva	5.0	5.0	4.5	5.0	4.5	4.5	5.0	4.5	5.0	4.5	47.5	Chocolate dulce,Astringente,Herbal,Amargo,
AC1200	290312	HISAH12054	Colombia	Huila	Isnos	100% ARABICA COLOMBIA	0	tostado molido y verde molido	h	0	Neiva, Pergamino especial, lotemm:11112204A/K02 x 275 s/s	4.5	4.0	4.0	4.0	4.0	4.5	4.5	4.0	4.5	4.0	42.0	Chocolate dulce,Dulce,Amargo,Amargo,
AC1200	290312	HISAH12054	Colombia	Huila	Isnos	100% ARABICA COLOMBIA	0	tostado molido y verde molido	h	0	Neiva, Pergamino especial, lotemm:11112204A/K02 x 275 s/s	4.5	4.0	4.0	4.0	4.0	4.5	4.5	4.0	4.5	4.0	42.0	Chocolate dulce,Dulce,Amargo,Amargo,
AC1200	290312	HISAH12054	Colombia	Huila	Isnos	100% ARABICA COLOMBIA	0	tostado molido y verde molido	h	0	Neiva, Pergamino especial, lotemm:11112204A/K02 x 275 s/s	4.5	4.0	4.0	4.0	4.0	4.5	4.5	4.0	4.5	4.0	42.0	Chocolate dulce,Dulce,Amargo,Amargo,
AC1201	290312	HPAAH12051	Colombia	Huila	Palestina	100% ARABICA COLOMBIA	0	tostado molido y verde molido	h	0	Neiva, Pergamino especial, lotemm:11112104AD/K02 x 299 s/s	5.5	5.5	5.0	5.0	5.0	5.5	5.5	5.0	5.0	5.0	52.0	Chocolate dulce,Floral,Suave,Limpio,
AC1201	290312	HPAAH12051	Colombia	Huila	Palestina	100% ARABICA COLOMBIA	0	tostado molido y verde molido	h	0	Neiva, Pergamino especial, lotemm:11112104AD/K02 x 299 s/s	5.5	5.5	5.0	5.0	5.0	5.5	5.5	5.0	5.0	5.0	52.0	Chocolate dulce,Floral,Suave,Limpio,
AC1201	290312	HPAAH12051	Colombia	Huila	Palestina	100% ARABICA COLOMBIA	0	tostado molido y verde molido	h	0	Neiva, Pergamino especial, lotemm:11112104AD/K02 x 299 s/s	5.5	5.5	5.0	5.0	5.0	5.5	5.5	5.0	5.0	5.0	52.0	Chocolate dulce,Floral,Suave,Limpio,
AC1204	290312	BRAAS12063	Brazil	NA	NA	Arabica	0	verde molido y tostado molido fino	s	0	Alfenas, beneficio semiseco	4.0	3.5	3.5	4.0	3.5	4.0	5.0	3.5	4.0	4.0	39.0	Chocolate amargo,Cereal,Amargo,Amargo,Astringente,
AC1204	290312	BRAAS12063	Brazil	NA	NA	Arabica	0	verde molido y tostado molido fino	s	0	Alfenas, beneficio semiseco	4.0	3.5	3.5	4.0	3.5	4.0	5.0	3.5	4.0	4.0	39.0	Chocolate amargo,Cereal,Amargo,Amargo,Astringente,
AC1204	290312	BRAAS12063	Brazil	NA	NA	Arabica	0	verde molido y tostado molido fino	s	0	Alfenas, beneficio semiseco	4.0	3.5	3.5	4.0	3.5	4.0	5.0	3.5	4.0	4.0	39.0	Chocolate amargo,Cereal,Amargo,Amargo,Astringente,
AC1205	290312	HSMAH12053	Colombia	Huila	Santa María	100% ARABICA COLOMBIA	0	tostado molido y verde molido	h	0	Neiva, Pergamino especial, Lotemm: 11112104A/K02	4.0	3.5	3.5	4.0	3.0	4.0	4.0	3.5	4.0	4.0	37.5	Frutal,Herbal,Astringente,Frutal,Pulpa,
AC1205	290312	HSMAH12053	Colombia	Huila	Santa María	100% ARABICA COLOMBIA	0	tostado molido y verde molido	h	0	Neiva, Pergamino especial, Lotemm: 11112104A/K02	4.0	3.5	3.5	4.0	3.0	4.0	4.0	3.5	4.0	4.0	37.5	Frutal,Herbal,Astringente,Frutal,Pulpa,
AC1205	290312	HSMAH12053	Colombia	Huila	Santa María	100% ARABICA COLOMBIA	0	tostado molido y verde molido	h	0	Neiva, Pergamino especial, Lotemm: 11112104A/K02	4.0	3.5	3.5	4.0	3.0	4.0	4.0	3.5	4.0	4.0	37.5	Frutal,Herbal,Astringente,Frutal,Pulpa,
AC1206	290312	HPAAH12049	Colombia	Huila	Paicol	100% ARABICA COLOMBIA	0	tostado molido y verde molido	h	0	Neiva, Pergamino especial, Lotemm: 21112201IA/K02 x 190 s/s	5.0	5.0	5.0	5.0	4.5	4.5	5.0	5.0	5.0	5.0	49.0	Floral,Chocolate amargo,Floral,Floral,
AC1206	290312	HPAAH12049	Colombia	Huila	Paicol	100% ARABICA COLOMBIA	0	tostado molido y verde molido	h	0	Neiva, Pergamino especial, Lotemm: 21112201IA/K02 x 190 s/s	5.0	5.0	5.0	5.0	4.5	4.5	5.0	5.0	5.0	5.0	49.0	Floral,Chocolate amargo,Floral,Floral,
AC1206	290312	HPAAH12049	Colombia	Huila	Paicol	100% ARABICA COLOMBIA	0	tostado molido y verde molido	h	0	Neiva, Pergamino especial, Lotemm: 21112201IA/K02 x 190 s/s	5.0	5.0	5.0	5.0	4.5	4.5	5.0	5.0	5.0	5.0	49.0	Floral,Chocolate amargo,Floral,Floral,
AC1207	290312	MCIAH12041	Colombia	Magdalena	Cienaga	100% ARABICA COLOMBIA	0	verde molido	h	0	San Pedro, Altura 1360 msnm	4.5	4.0	4.0	5.0	4.0	4.0	5.0	3.5	5.0	4.0	43.0	Chocolate dulce,Metalico,					1360
AC1207	290312	MCIAH12041	Colombia	Magdalena	Cienaga	100% ARABICA COLOMBIA	0	verde molido	h	0	San Pedro, Altura 1360 msnm	4.5	4.0	4.0	5.0	4.0	4.0	5.0	3.5	5.0	4.0	43.0	Chocolate dulce,Metalico,					1360
AC1207	290312	MCIAH12041	Colombia	Magdalena	Cienaga	100% ARABICA COLOMBIA	0	verde molido	h	0	San Pedro, Altura 1360 msnm	4.5	4.0	4.0	5.0	4.0	4.0	5.0	3.5	5.0	4.0	43.0	Chocolate dulce,Metalico,					1360
AC1208	290312	HCOAH12050	Colombia	Huila	Colombia	100% ARABICA COLOMBIA	0	tostado molido y verde molido	h	0	Neiva	5.0	4.5	4.5	4.5	4.5	4.0	4.5	4.5	4.5	4.5	45.0	Floral,Chocolate amargo,Herbal,Herbal,
AC1208	290312	HCOAH12050	Colombia	Huila	Colombia	100% ARABICA COLOMBIA	0	tostado molido y verde molido	h	0	Neiva	5.0	4.5	4.5	4.5	4.5	4.0	4.5	4.5	4.5	4.5	45.0	Floral,Chocolate amargo,Herbal,Herbal,
AC1208	290312	HCOAH12050	Colombia	Huila	Colombia	100% ARABICA COLOMBIA	0	tostado molido y verde molido	h	0	Neiva	5.0	4.5	4.5	4.5	4.5	4.0	4.5	4.5	4.5	4.5	45.0	Floral,Chocolate amargo,Herbal,Herbal,
AC1211	290312	MCIAH12042	Colombia	Magdalena	Cienaga	100% ARABICA COLOMBIA	0	tostado molido y verde molido	h	0	San Pedro, Altura 1600 msnm	5.0	6.0	6.0	6.0	5.0	6.0	6.0	6.0	5.5	6.0	57.5	Cereal,Frutal,Suave,Limpio,					1600
AC1211	290312	MCIAH12042	Colombia	Magdalena	Cienaga	100% ARABICA COLOMBIA	0	tostado molido y verde molido	h	0	San Pedro, Altura 1600 msnm	5.0	6.0	6.0	6.0	5.0	6.0	6.0	6.0	5.5	6.0	57.5	Cereal,Frutal,Suave,Limpio,					1600
AC1211	290312	MCIAH12042	Colombia	Magdalena	Cienaga	100% ARABICA COLOMBIA	0	tostado molido y verde molido	h	0	San Pedro, Altura 1600 msnm	5.0	6.0	6.0	6.0	5.0	6.0	6.0	6.0	5.5	6.0	57.5	Cereal,Frutal,Suave,Limpio,					1600
AC1212	290312	MSMAH12043	Colombia	Magdalena	Santa Marta	100% ARABICA COLOMBIA	0	verde molido	h	0	Minca, Altura 1300 msnm	6.0	5.0	4.5	5.0	5.0	5.0	6.0	5.5	7.0	5.5	54.5	Frutal,Frutal,Cereal,Frutal,					1300
AC1212	290312	MSMAH12043	Colombia	Magdalena	Santa Marta	100% ARABICA COLOMBIA	0	verde molido	h	0	Minca, Altura 1300 msnm	6.0	5.0	4.5	5.0	5.0	5.0	6.0	5.5	7.0	5.5	54.5	Frutal,Frutal,Cereal,Frutal,					1300
AC1212	290312	MSMAH12043	Colombia	Magdalena	Santa Marta	100% ARABICA COLOMBIA	0	verde molido	h	0	Minca, Altura 1300 msnm	6.0	5.0	4.5	5.0	5.0	5.0	6.0	5.5	7.0	5.5	54.5	Frutal,Frutal,Cereal,Frutal,					1300
AC1213	290312	BRAAS12064	Brazil	NA	NA	Arabica	0	verde molido y tostado molido fino	s	0	Alfenas, lavado	4.5	3.0	3.0	3.5	3.0	3.5	5.0	3.5	3.0	3.5	35.5	Chocolate amargo,Tabaco,Harina,Harina,Astringente,
AC1213	290312	BRAAS12064	Brazil	NA	NA	Arabica	0	verde molido y tostado molido fino	s	0	Alfenas, lavado	4.5	3.0	3.0	3.5	3.0	3.5	5.0	3.5	3.0	3.5	35.5	Chocolate amargo,Tabaco,Harina,Harina,Astringente,
AC1213	290312	BRAAS12064	Brazil	NA	NA	Arabica	0	verde molido y tostado molido fino	s	0	Alfenas, lavado	4.5	3.0	3.0	3.5	3.0	3.5	5.0	3.5	3.0	3.5	35.5	Chocolate amargo,Tabaco,Harina,Harina,Astringente,
AC1216	290312	HNAAH12057	Colombia	Huila	Nataga	100% ARABICA COLOMBIA	0	tostado molido y verde molido	h	0	Neiva, Pergamino especial, Lotemm:11112204A/K02 Neiva x 100 s/s
AC1216	290312	HNAAH12057	Colombia	Huila	Nataga	100% ARABICA COLOMBIA	0	tostado molido y verde molido	h	0	Neiva, Pergamino especial, Lotemm:11112204A/K02 Neiva x 100 s/s
AC1216	290312	HNAAH12057	Colombia	Huila	Nataga	100% ARABICA COLOMBIA	0	tostado molido y verde molido	h	0	Neiva, Pergamino especial, Lotemm:11112204A/K02 Neiva x 100 s/s
AC1217	290312	HTEAH12048	Colombia	Huila	Tesalia	100% ARABICA COLOMBIA	0	tostado molido y verde molido	h	0	Neiva, Pergamino especial, Lotemm:11112104AD/K02 Neiva x 22 s/s	5.0	4.0	4.0	4.5	4.0	4.0	4.5	4.0	4.5	4.0	42.5	Chocolate amargo,Herbal,Amargo,Astringente,Amargo,
AC1217	290312	HTEAH12048	Colombia	Huila	Tesalia	100% ARABICA COLOMBIA	0	tostado molido y verde molido	h	0	Neiva, Pergamino especial, Lotemm:11112104AD/K02 Neiva x 22 s/s	5.0	4.0	4.0	4.5	4.0	4.0	4.5	4.0	4.5	4.0	42.5	Chocolate amargo,Herbal,Amargo,Astringente,Amargo,
AC1217	290312	HTEAH12048	Colombia	Huila	Tesalia	100% ARABICA COLOMBIA	0	tostado molido y verde molido	h	0	Neiva, Pergamino especial, Lotemm:11112104AD/K02 Neiva x 22 s/s	5.0	4.0	4.0	4.5	4.0	4.0	4.5	4.0	4.5	4.0	42.5	Chocolate amargo,Herbal,Amargo,Astringente,Amargo,
AC1227	Jun2012	VIERS11107	Vietnam	NA	NA	Robusta	100	tostado molido	s	0	Vietnam Variedad G1/2% Sc-16	2.0	3.0	3.0	3.5	3.0	3.0	5.0	3.5	3.0	3.0	32.0	Harina,Astringente,Cereal,Amargo,Astringente,
AC1227	Jun2012	VIERS11107	Vietnam	NA	NA	Robusta	100	tostado molido	s	0	Vietnam Variedad G1/2% Sc-16	2.0	3.0	3.0	3.5	3.0	3.0	5.0	3.5	3.0	3.0	32.0	Harina,Astringente,Cereal,Amargo,Astringente,
AC1227	Jun2012	VIERS11107	Vietnam	NA	NA	Robusta	100	tostado molido	s	0	Vietnam Variedad G1/2% Sc-16	2.0	3.0	3.0	3.5	3.0	3.0	5.0	3.5	3.0	3.0	32.0	Harina,Astringente,Cereal,Amargo,Astringente,
AC1229	Jun2012	PANAH12122	Panama	NA	NA	Arabica	0	tostado molido fino	h	0	Panama Geisha	5.5	6.0	5.5	5.5	5.0	6.0	6.5	6.0	5.5	6.0	57.5	Dulce,Dulce,Suave,								GEISHA
AC1229	Jun2012	PANAH12122	Panama	NA	NA	Arabica	0	tostado molido fino	h	0	Panama Geisha	5.5	6.0	5.5	5.5	5.0	6.0	6.5	6.0	5.5	6.0	57.5	Dulce,Dulce,Suave,								GEISHA
AC1229	Jun2012	PANAH12122	Panama	NA	NA	Arabica	0	tostado molido fino	h	0	Panama Geisha	5.5	6.0	5.5	5.5	5.0	6.0	6.5	6.0	5.5	6.0	57.5	Dulce,Dulce,Suave,								GEISHA
AC1234	Jun2012	TANRS11078	Tanzania	NA	NA	Robusta	100	verde molido y tostado molido fino	s	0		3.0	4.5	3.5	4.5	4.0	4.0	4.0	3.5	4.5	3.5	39.0	Harina,Harina,Citrico,Citrico,Amargo,
AC1234	Jun2012	TANRS11078	Tanzania	NA	NA	Robusta	100	verde molido y tostado molido fino	s	0		3.0	4.5	3.5	4.5	4.0	4.0	4.0	3.5	4.5	3.5	39.0	Harina,Harina,Citrico,Citrico,Amargo,
AC1234	Jun2012	TANRS11078	Tanzania	NA	NA	Robusta	100	verde molido y tostado molido fino	s	0		3.0	4.5	3.5	4.5	4.0	4.0	4.0	3.5	4.5	3.5	39.0	Harina,Harina,Citrico,Citrico,Amargo,
AC1241	Jun2012	NBUAH12031	Colombia	Narino	Buesaco	100% ARABICA COLOMBIA	0	verde molido y tostado molido fino	h	0	Almendra Especial, 50 s/s	6.0	5.5	5.0	5.5	4.5	5.0	6.0	5.0	5.5	5.0	53.0	Dulce,Caramelo,Dulce,Astringente,Astringente,
AC1241	Jun2012	NBUAH12031	Colombia	Narino	Buesaco	100% ARABICA COLOMBIA	0	verde molido y tostado molido fino	h	0	Almendra Especial, 50 s/s	6.0	5.5	5.0	5.5	4.5	5.0	6.0	5.0	5.5	5.0	53.0	Dulce,Caramelo,Dulce,Astringente,Astringente,
AC1241	Jun2012	NBUAH12031	Colombia	Narino	Buesaco	100% ARABICA COLOMBIA	0	verde molido y tostado molido fino	h	0	Almendra Especial, 50 s/s	6.0	5.5	5.0	5.5	4.5	5.0	6.0	5.0	5.5	5.0	53.0	Dulce,Caramelo,Dulce,Astringente,Astringente,
AC1242	Jun2012	NUNAH12032	Colombia	Narino	Union	100% ARABICA COLOMBIA	0	verde molido y tostado molido fino	h	0	Almendra especial, 250 s/s	4.5	5.0	4.5	5.0	4.5	5.0	5.0	5.0	5.5	5.0	49.0	Chocolate amargo,Mieloso,Amargo,
AC1242	Jun2012	NUNAH12032	Colombia	Narino	Union	100% ARABICA COLOMBIA	0	verde molido y tostado molido fino	h	0	Almendra especial, 250 s/s	4.5	5.0	4.5	5.0	4.5	5.0	5.0	5.0	5.5	5.0	49.0	Chocolate amargo,Mieloso,Amargo,
AC1242	Jun2012	NUNAH12032	Colombia	Narino	Union	100% ARABICA COLOMBIA	0	verde molido y tostado molido fino	h	0	Almendra especial, 250 s/s	4.5	5.0	4.5	5.0	4.5	5.0	5.0	5.0	5.5	5.0	49.0	Chocolate amargo,Mieloso,Amargo,
AC1243	Jun2012	NTAAH12033	Colombia	Narino	Taminango	100% ARABICA COLOMBIA	0	verde molido y tostado molido fino	h	0	Almendra Especial, 275 s/s	6.0	5.0	4.5	5.0	4.5	5.0	5.0	5.0	5.0	5.0	50.0	Dulce,Frutal,Amargo,Dulce,Amargo,
AC1243	Jun2012	NTAAH12033	Colombia	Narino	Taminango	100% ARABICA COLOMBIA	0	verde molido y tostado molido fino	h	0	Almendra Especial, 275 s/s	6.0	5.0	4.5	5.0	4.5	5.0	5.0	5.0	5.0	5.0	50.0	Dulce,Frutal,Amargo,Dulce,Amargo,
AC1243	Jun2012	NTAAH12033	Colombia	Narino	Taminango	100% ARABICA COLOMBIA	0	verde molido y tostado molido fino	h	0	Almendra Especial, 275 s/s	6.0	5.0	4.5	5.0	4.5	5.0	5.0	5.0	5.0	5.0	50.0	Dulce,Frutal,Amargo,Dulce,Amargo,
AC1246	Jun2012	NTBAH12036	Colombia	Narino	Tablon	100% ARABICA COLOMBIA	0	verde molido y tostado molido fino	h	0	Almendra Especial, 83 s/s	4.5	4.5	4.5	4.5	4.5	4.5	4.5	5.0	5.0	4.5	46.0	Herbal,Chocolate dulce,Dulce,Amargo,Herbal,Amargo,
AC1246	Jun2012	NTBAH12036	Colombia	Narino	Tablon	100% ARABICA COLOMBIA	0	verde molido y tostado molido fino	h	0	Almendra Especial, 83 s/s	4.5	4.5	4.5	4.5	4.5	4.5	4.5	5.0	5.0	4.5	46.0	Herbal,Chocolate dulce,Dulce,Amargo,Herbal,Amargo,
AC1246	Jun2012	NTBAH12036	Colombia	Narino	Tablon	100% ARABICA COLOMBIA	0	verde molido y tostado molido fino	h	0	Almendra Especial, 83 s/s	4.5	4.5	4.5	4.5	4.5	4.5	4.5	5.0	5.0	4.5	46.0	Herbal,Chocolate dulce,Dulce,Amargo,Herbal,Amargo,
AC1247	Jun2012	NROAH12037	Colombia	Narino	Rosario	100% ARABICA COLOMBIA	0	verde molido y tostado molido fino	h	0	Almendra Especial, 40 s/s	5.0	5.0	5.0	6.0	5.0	5.0	4.5	5.5	5.0	5.5	51.5	Inmaduro,Chocolate dulce,Dulce,Astringente,Dulce,
AC1247	Jun2012	NROAH12037	Colombia	Narino	Rosario	100% ARABICA COLOMBIA	0	verde molido y tostado molido fino	h	0	Almendra Especial, 40 s/s	5.0	5.0	5.0	6.0	5.0	5.0	4.5	5.5	5.0	5.5	51.5	Inmaduro,Chocolate dulce,Dulce,Astringente,Dulce,
AC1247	Jun2012	NROAH12037	Colombia	Narino	Rosario	100% ARABICA COLOMBIA	0	verde molido y tostado molido fino	h	0	Almendra Especial, 40 s/s	5.0	5.0	5.0	6.0	5.0	5.0	4.5	5.5	5.0	5.5	51.5	Inmaduro,Chocolate dulce,Dulce,Astringente,Dulce,
AC1248	Jun2012	NSJAH12038	Colombia	Narino	San Jose	100% ARABICA COLOMBIA	0	verde molido y tostado molido fino	h	0	Almendra Especial, 152 s/s	6.5	7.0	6.5	7.0	6.5	7.0	7.0	7.0	8.0	7.5	70.0	Frutal,Frutal,Frutal,Inmaduro,
AC1248	Jun2012	NSJAH12038	Colombia	Narino	San Jose	100% ARABICA COLOMBIA	0	verde molido y tostado molido fino	h	0	Almendra Especial, 152 s/s	6.5	7.0	6.5	7.0	6.5	7.0	7.0	7.0	8.0	7.5	70.0	Frutal,Frutal,Frutal,Inmaduro,
AC1248	Jun2012	NSJAH12038	Colombia	Narino	San Jose	100% ARABICA COLOMBIA	0	verde molido y tostado molido fino	h	0	Almendra Especial, 152 s/s	6.5	7.0	6.5	7.0	6.5	7.0	7.0	7.0	8.0	7.5	70.0	Frutal,Frutal,Frutal,Inmaduro,
AC1250	Jun2012	VIERS11068	Vietnam	NA	NA	Robusta	100	verde molido y tostado molido fino	s	0	Robusta	3.0	3.0	2.5	4.0	3.0	3.5	4.0	3.5	3.0	3.0	32.5	Harina,Amargo,Amargo,Harina,
AC1250	Jun2012	VIERS11068	Vietnam	NA	NA	Robusta	100	verde molido y tostado molido fino	s	0	Robusta	3.0	3.0	2.5	4.0	3.0	3.5	4.0	3.5	3.0	3.0	32.5	Harina,Amargo,Amargo,Harina,
AC1250	Jun2012	VIERS11068	Vietnam	NA	NA	Robusta	100	verde molido y tostado molido fino	s	0	Robusta	3.0	3.0	2.5	4.0	3.0	3.5	4.0	3.5	3.0	3.0	32.5	Harina,Amargo,Amargo,Harina,
AC1251	Jun2012	CAMRS11069	Cameroon	NA	NA	Robusta	100	verde molido y tostado molido fino	s	0	Robusta GII	2.0	2.0	2.0	2.0	2.0	2.5	4.0	2.0	1.5	2.0	22.0	Harina,Harina,Sucio,Tierra,
AC1251	Jun2012	CAMRS11069	Cameroon	NA	NA	Robusta	100	verde molido y tostado molido fino	s	0	Robusta GII	2.0	2.0	2.0	2.0	2.0	2.5	4.0	2.0	1.5	2.0	22.0	Harina,Harina,Sucio,Tierra,
AC1251	Jun2012	CAMRS11069	Cameroon	NA	NA	Robusta	100	verde molido y tostado molido fino	s	0	Robusta GII	2.0	2.0	2.0	2.0	2.0	2.5	4.0	2.0	1.5	2.0	22.0	Harina,Harina,Sucio,Tierra,
AC1252	Jun2012	TOGRS11070	Togo	NA	NA	Robusta	100	verde molido y tostado molido fino	s	0	Robusta GI	2.0	2.0	2.5	2.0	2.0	2.5	4.0	2.5	2.0	2.5	24.0	Harina,Harina,Sucio,Amargo,Metalico,
AC1252	Jun2012	TOGRS11070	Togo	NA	NA	Robusta	100	verde molido y tostado molido fino	s	0	Robusta GI	2.0	2.0	2.5	2.0	2.0	2.5	4.0	2.5	2.0	2.5	24.0	Harina,Harina,Sucio,Amargo,Metalico,
AC1252	Jun2012	TOGRS11070	Togo	NA	NA	Robusta	100	verde molido y tostado molido fino	s	0	Robusta GI	2.0	2.0	2.5	2.0	2.0	2.5	4.0	2.5	2.0	2.5	24.0	Harina,Harina,Sucio,Amargo,Metalico,
AC1256	Jun2012	INDRH11073	India	NA	NA	Robusta	100	verde molido y tostado molido fino	h	0	Robusta Washed	2.5	2.5	2.0	2.0	2.0	2.0	4.0	2.5	2.5	2.0	24.0	Harina,Amargo,Amargo,
AC1256	Jun2012	INDRH11073	India	NA	NA	Robusta	100	verde molido y tostado molido fino	h	0	Robusta Washed	2.5	2.5	2.0	2.0	2.0	2.0	4.0	2.5	2.5	2.0	24.0	Harina,Amargo,Amargo,
AC1256	Jun2012	INDRH11073	India	NA	NA	Robusta	100	verde molido y tostado molido fino	h	0	Robusta Washed	2.5	2.5	2.0	2.0	2.0	2.0	4.0	2.5	2.5	2.0	24.0	Harina,Amargo,Amargo,
AC1258	Jun2012	UGARS11075	Uganda	NA	NA	Robusta	100	verde molido y tostado molido fino	s	0	Natural Robusta	2.0	4.0	4.0	4.0	3.5	4.0	4.0	4.0	4.5	4.0	38.0	Harina,Limpio,Limpio,
AC1258	Jun2012	UGARS11075	Uganda	NA	NA	Robusta	100	verde molido y tostado molido fino	s	0	Natural Robusta	2.0	4.0	4.0	4.0	3.5	4.0	4.0	4.0	4.5	4.0	38.0	Harina,Limpio,Limpio,
AC1258	Jun2012	UGARS11075	Uganda	NA	NA	Robusta	100	verde molido y tostado molido fino	s	0	Natural Robusta	2.0	4.0	4.0	4.0	3.5	4.0	4.0	4.0	4.5	4.0	38.0	Harina,Limpio,Limpio,
AC1260	Jun2012	SUMRS11077	Indonesia	Sumatra	NA	Robusta	100	verde molido y tostado molido fino	s	0		3.0	3.5	3.5	4.0	3.0	3.0	4.0	3.5	3.5	3.0	34.0	Harina,Limpio,Amargo,Limpio,
AC1260	Jun2012	SUMRS11077	Indonesia	Sumatra	NA	Robusta	100	verde molido y tostado molido fino	s	0		3.0	3.5	3.5	4.0	3.0	3.0	4.0	3.5	3.5	3.0	34.0	Harina,Limpio,Amargo,Limpio,
AC1260	Jun2012	SUMRS11077	Indonesia	Sumatra	NA	Robusta	100	verde molido y tostado molido fino	s	0		3.0	3.5	3.5	4.0	3.0	3.0	4.0	3.5	3.5	3.0	34.0	Harina,Limpio,Amargo,Limpio,
AC1290	Jul2012	VIERS11100	Vietnam	NA	NA	Robusta	100	verde molido y tostado molido fino	s	0	Robusta, G2 / 5% BB	3.0	2.0	2.0	2.0	2.0	2.0	5.0	2.5	2.5	2.0	25.0	Harina,Harina,Amargo,Harina,
AC1290	Jul2012	VIERS11100	Vietnam	NA	NA	Robusta	100	verde molido y tostado molido fino	s	0	Robusta, G2 / 5% BB	3.0	2.0	2.0	2.0	2.0	2.0	5.0	2.5	2.5	2.0	25.0	Harina,Harina,Amargo,Harina,
AC1290	Jul2012	VIERS11100	Vietnam	NA	NA	Robusta	100	verde molido y tostado molido fino	s	0	Robusta, G2 / 5% BB	3.0	2.0	2.0	2.0	2.0	2.0	5.0	2.5	2.5	2.0	25.0	Harina,Harina,Amargo,Harina,
AC1291	Jul2012	CRIAH12101	Costa Rica	NA	NA	Arabica	0	verde molido y tostado molido fino	h	0		4.0	4.0	4.0	4.5	4.0	4.0	4.5	4.0	4.0	4.0	41.0	Cereal,Chocolate dulce,Inmaduro,Astringente,Herbal,Astringente,Herbal,Inmaduro,
AC1291	Jul2012	CRIAH12101	Costa Rica	NA	NA	Arabica	0	verde molido y tostado molido fino	h	0		4.0	4.0	4.0	4.5	4.0	4.0	4.5	4.0	4.0	4.0	41.0	Cereal,Chocolate dulce,Inmaduro,Astringente,Herbal,Astringente,Herbal,Inmaduro,
AC1291	Jul2012	CRIAH12101	Costa Rica	NA	NA	Arabica	0	verde molido y tostado molido fino	h	0		4.0	4.0	4.0	4.5	4.0	4.0	4.5	4.0	4.0	4.0	41.0	Cereal,Chocolate dulce,Inmaduro,Astringente,Herbal,Astringente,Herbal,Inmaduro,
AC1294	Jul2012	INDRS11105	India	NA	NA	Robusta	100	verde molido y tostado molido fino	s	0	G-AB	2.5	2.0	2.0	4.0	2.0	2.5	5.0	2.0	2.5	2.5	27.0	Harina,Harina,
AC1294	Jul2012	INDRS11105	India	NA	NA	Robusta	100	verde molido y tostado molido fino	s	0	G-AB	2.5	2.0	2.0	4.0	2.0	2.5	5.0	2.0	2.5	2.5	27.0	Harina,Harina,
AC1294	Jul2012	INDRS11105	India	NA	NA	Robusta	100	verde molido y tostado molido fino	s	0	G-AB	2.5	2.0	2.0	4.0	2.0	2.5	5.0	2.0	2.5	2.5	27.0	Harina,Harina,
AC1295	Jul2012	UGARS11106	Uganda	NA	NA	Robusta	100	verde molido y tostado molido fino	s	0	Sc - 15	3.0	3.0	3.0	3.5	2.0	2.0	5.0	2.0	2.0	2.5	28.0	Harina,Herbal,Harina,Herbal,
AC1295	Jul2012	UGARS11106	Uganda	NA	NA	Robusta	100	verde molido y tostado molido fino	s	0	Sc - 15	3.0	3.0	3.0	3.5	2.0	2.0	5.0	2.0	2.0	2.5	28.0	Harina,Herbal,Harina,Herbal,
AC1295	Jul2012	UGARS11106	Uganda	NA	NA	Robusta	100	verde molido y tostado molido fino	s	0	Sc - 15	3.0	3.0	3.0	3.5	2.0	2.0	5.0	2.0	2.0	2.5	28.0	Harina,Herbal,Harina,Herbal,
AC1296	Jul2012	UGARS11108	Uganda	NA	NA	Robusta	100	verde molido y tostado molido fino	s	0	Robusta G-1/2% SC-K	3.0	2.0	2.5	2.0	1.5	2.0	4.0	2.5	2.0	2.0	23.5	Anuesado,Harina,Harina,
AC1296	Jul2012	UGARS11108	Uganda	NA	NA	Robusta	100	verde molido y tostado molido fino	s	0	Robusta G-1/2% SC-K	3.0	2.0	2.5	2.0	1.5	2.0	4.0	2.5	2.0	2.0	23.5	Anuesado,Harina,Harina,
AC1296	Jul2012	UGARS11108	Uganda	NA	NA	Robusta	100	verde molido y tostado molido fino	s	0	Robusta G-1/2% SC-K	3.0	2.0	2.5	2.0	1.5	2.0	4.0	2.5	2.0	2.0	23.5	Anuesado,Harina,Harina,
AC1297	Jul2012	GUAAH11109	Guatemala	NA	NA	Arabica	0	verde molido y tostado molido fino	h	0		4.5	5.5	5.5	5.5	6.0	5.5	5.0	6.0	7.0	6.5	57.0	Dulce,Caramelo,Caramelo,
AC1297	Jul2012	GUAAH11109	Guatemala	NA	NA	Arabica	0	verde molido y tostado molido fino	h	0		4.5	5.5	5.5	5.5	6.0	5.5	5.0	6.0	7.0	6.5	57.0	Dulce,Caramelo,Caramelo,
AC1297	Jul2012	GUAAH11109	Guatemala	NA	NA	Arabica	0	verde molido y tostado molido fino	h	0		4.5	5.5	5.5	5.5	6.0	5.5	5.0	6.0	7.0	6.5	57.0	Dulce,Caramelo,Caramelo,
AC1302	Jul2012	PERAH12114	Peru	NA	NA	Arabica	0	verde molido y tostado molido fino	h	0	HB	2.5	4.0	4.0	6.0	4.0	4.0	5.0	3.5	5.0	3.5	41.5	Dulce,Madera,Madera,Astringente,Madera,
AC1302	Jul2012	PERAH12114	Peru	NA	NA	Arabica	0	verde molido y tostado molido fino	h	0	HB	2.5	4.0	4.0	6.0	4.0	4.0	5.0	3.5	5.0	3.5	41.5	Dulce,Madera,Madera,Astringente,Madera,
AC1302	Jul2012	PERAH12114	Peru	NA	NA	Arabica	0	verde molido y tostado molido fino	h	0	HB	2.5	4.0	4.0	6.0	4.0	4.0	5.0	3.5	5.0	3.5	41.5	Dulce,Madera,Madera,Astringente,Madera,
AC1309	Jul2012	BRAAS11121	Brazil	NA	NA	Arabica	0	verde molido y tostado molido fino	s	0		4.5	4.5	4.5	4.5	4.0	4.5	4.5	4.0	4.5	4.0	43.5	Picante,Inmaduro,Astringente,Astringente,Inmaduro,
AC1309	Jul2012	BRAAS11121	Brazil	NA	NA	Arabica	0	verde molido y tostado molido fino	s	0		4.5	4.5	4.5	4.5	4.0	4.5	4.5	4.0	4.5	4.0	43.5	Picante,Inmaduro,Astringente,Astringente,Inmaduro,
AC1309	Jul2012	BRAAS11121	Brazil	NA	NA	Arabica	0	verde molido y tostado molido fino	s	0		4.5	4.5	4.5	4.5	4.0	4.5	4.5	4.0	4.5	4.0	43.5	Picante,Inmaduro,Astringente,Astringente,Inmaduro,
AC1315	Jul2012	SZAAH12144	Colombia	Santander	Zapatoca	100% ARABICA COLOMBIA	0	verde molido y tostado molido fino	h	0		4.5	4.5	4.5	5.0	4.5	4.5	5.0	4.5	5.0	4.5	46.5	Cereal,Dulce,Dulce,Astringente,Dulce,
AC1315	Jul2012	SZAAH12144	Colombia	Santander	Zapatoca	100% ARABICA COLOMBIA	0	verde molido y tostado molido fino	h	0		4.5	4.5	4.5	5.0	4.5	4.5	5.0	4.5	5.0	4.5	46.5	Cereal,Dulce,Dulce,Astringente,Dulce,
AC1315	Jul2012	SZAAH12144	Colombia	Santander	Zapatoca	100% ARABICA COLOMBIA	0	verde molido y tostado molido fino	h	0		4.5	4.5	4.5	5.0	4.5	4.5	5.0	4.5	5.0	4.5	46.5	Cereal,Dulce,Dulce,Astringente,Dulce,
AC1316	Jul2012	SSVAH12145	Colombia	Santander	San Vicente	100% ARABICA COLOMBIA	0	verde molido y tostado molido fino	h	0		5.5	5.0	4.0	5.0	4.0	4.0	5.0	4.0	5.0	4.0	45.5	Chocolate dulce,Dulce,Astringente,Seco,
AC1316	Jul2012	SSVAH12145	Colombia	Santander	San Vicente	100% ARABICA COLOMBIA	0	verde molido y tostado molido fino	h	0		5.5	5.0	4.0	5.0	4.0	4.0	5.0	4.0	5.0	4.0	45.5	Chocolate dulce,Dulce,Astringente,Seco,
AC1316	Jul2012	SSVAH12145	Colombia	Santander	San Vicente	100% ARABICA COLOMBIA	0	verde molido y tostado molido fino	h	0		5.5	5.0	4.0	5.0	4.0	4.0	5.0	4.0	5.0	4.0	45.5	Chocolate dulce,Dulce,Astringente,Seco,
AC1317	Jul2012	SSGAH12146	Colombia	Santander	San Gil	100% ARABICA COLOMBIA	0	verde molido y tostado molido fino	h	0		4.5	4.5	4.5	5.0	4.5	4.5	5.0	4.5	5.5	4.5	47.0	Chocolate dulce,Astringente,Dulce,Astringente,
AC1317	Jul2012	SSGAH12146	Colombia	Santander	San Gil	100% ARABICA COLOMBIA	0	verde molido y tostado molido fino	h	0		4.5	4.5	4.5	5.0	4.5	4.5	5.0	4.5	5.5	4.5	47.0	Chocolate dulce,Astringente,Dulce,Astringente,
AC1317	Jul2012	SSGAH12146	Colombia	Santander	San Gil	100% ARABICA COLOMBIA	0	verde molido y tostado molido fino	h	0		4.5	4.5	4.5	5.0	4.5	4.5	5.0	4.5	5.5	4.5	47.0	Chocolate dulce,Astringente,Dulce,Astringente,
AC1318	Jul2012	SSUAH12147	Colombia	Santander	Suaita	100% ARABICA COLOMBIA	0	verde molido y tostado molido fino	h	0		4.5	5.0	4.5	5.5	5.0	5.0	5.0	4.5	6.0	5.0	50.0	Chocolate dulce,Dulce,Astringente,Astringente,
AC1318	Jul2012	SSUAH12147	Colombia	Santander	Suaita	100% ARABICA COLOMBIA	0	verde molido y tostado molido fino	h	0		4.5	5.0	4.5	5.5	5.0	5.0	5.0	4.5	6.0	5.0	50.0	Chocolate dulce,Dulce,Astringente,Astringente,
AC1318	Jul2012	SSUAH12147	Colombia	Santander	Suaita	100% ARABICA COLOMBIA	0	verde molido y tostado molido fino	h	0		4.5	5.0	4.5	5.5	5.0	5.0	5.0	4.5	6.0	5.0	50.0	Chocolate dulce,Dulce,Astringente,Astringente,
AC1319	Jul2012	SBAAH12148	Colombia	Santander	Barbosa	100% ARABICA COLOMBIA	0	verde molido y tostado molido fino	h	0		6.0	6.0	5.0	6.0	5.0	5.5	6.0	5.5	6.5	6.0	57.5	Chocolate dulce,Dulce,Citrico,Citrico,Astringente,
AC1319	Jul2012	SBAAH12148	Colombia	Santander	Barbosa	100% ARABICA COLOMBIA	0	verde molido y tostado molido fino	h	0		6.0	6.0	5.0	6.0	5.0	5.5	6.0	5.5	6.5	6.0	57.5	Chocolate dulce,Dulce,Citrico,Citrico,Astringente,
AC1319	Jul2012	SBAAH12148	Colombia	Santander	Barbosa	100% ARABICA COLOMBIA	0	verde molido y tostado molido fino	h	0		6.0	6.0	5.0	6.0	5.0	5.5	6.0	5.5	6.5	6.0	57.5	Chocolate dulce,Dulce,Citrico,Citrico,Astringente,
AC1320	Jul2012	SSOAH12149	Colombia	Santander	Socorro	100% ARABICA COLOMBIA	0	verde molido y tostado molido fino	h	0		5.0	4.5	4.5	4.5	4.5	4.5	5.0	4.5	5.5	4.5	47.0	Dulce,Inmaduro,Astringente,Dulce,Astringente,Dulce,
AC1320	Jul2012	SSOAH12149	Colombia	Santander	Socorro	100% ARABICA COLOMBIA	0	verde molido y tostado molido fino	h	0		5.0	4.5	4.5	4.5	4.5	4.5	5.0	4.5	5.5	4.5	47.0	Dulce,Inmaduro,Astringente,Dulce,Astringente,Dulce,
AC1320	Jul2012	SSOAH12149	Colombia	Santander	Socorro	100% ARABICA COLOMBIA	0	verde molido y tostado molido fino	h	0		5.0	4.5	4.5	4.5	4.5	4.5	5.0	4.5	5.5	4.5	47.0	Dulce,Inmaduro,Astringente,Dulce,Astringente,Dulce,
AC1321	Jul2012	SOIAH12150	Colombia	Santander	Oiba	100% ARABICA COLOMBIA	0	verde molido y tostado molido fino	h	0		6.0	5.0	5.0	7.0	5.0	5.5	5.5	5.5	6.5	6.5	57.5	Chocolate dulce,Citrico,Citrico,
AC1321	Jul2012	SOIAH12150	Colombia	Santander	Oiba	100% ARABICA COLOMBIA	0	verde molido y tostado molido fino	h	0		6.0	5.0	5.0	7.0	5.0	5.5	5.5	5.5	6.5	6.5	57.5	Chocolate dulce,Citrico,Citrico,
AC1321	Jul2012	SOIAH12150	Colombia	Santander	Oiba	100% ARABICA COLOMBIA	0	verde molido y tostado molido fino	h	0		6.0	5.0	5.0	7.0	5.0	5.5	5.5	5.5	6.5	6.5	57.5	Chocolate dulce,Citrico,Citrico,
AC1322	Jul2012	SRIAH12151	Colombia	Santander	Rionegro	100% ARABICA COLOMBIA	0	verde molido y tostado molido fino	h	0		5.5	5.5	5.5	5.0	5.5	6.0	6.5	6.5	6.0	6.5	58.5	Chocolate dulce,Suave,Suave,
AC1322	Jul2012	SRIAH12151	Colombia	Santander	Rionegro	100% ARABICA COLOMBIA	0	verde molido y tostado molido fino	h	0		5.5	5.5	5.5	5.0	5.5	6.0	6.5	6.5	6.0	6.5	58.5	Chocolate dulce,Suave,Suave,
AC1322	Jul2012	SRIAH12151	Colombia	Santander	Rionegro	100% ARABICA COLOMBIA	0	verde molido y tostado molido fino	h	0		5.5	5.5	5.5	5.0	5.5	6.0	6.5	6.5	6.0	6.5	58.5	Chocolate dulce,Suave,Suave,
AC1325	Jul2012	PERAH11154	Peru	Villa Rica	NA	Arabica	0	verde molido y tostado molido fino	h	0	Finca Santa Teresa	4.0	3.5	3.0	5.0	3.0	3.0	5.0	3.5	5.0	2.5	37.5	Dulce,Cereal,Madera,Astringente,Madera,
AC1325	Jul2012	PERAH11154	Peru	Villa Rica	NA	Arabica	0	verde molido y tostado molido fino	h	0	Finca Santa Teresa	4.0	3.5	3.0	5.0	3.0	3.0	5.0	3.5	5.0	2.5	37.5	Dulce,Cereal,Madera,Astringente,Madera,
AC1325	Jul2012	PERAH11154	Peru	Villa Rica	NA	Arabica	0	verde molido y tostado molido fino	h	0	Finca Santa Teresa	4.0	3.5	3.0	5.0	3.0	3.0	5.0	3.5	5.0	2.5	37.5	Dulce,Cereal,Madera,Astringente,Madera,
AC1326	Jul2012	CRIAH12155	Costa Rica	NA	NA	Arabica	0	verde molido y tostado molido fino	h	0	Calidad HB / EP	5.0	4.0	4.0	4.0	4.0	4.0	4.5	4.0	4.0	4.0	41.5	Dulce,Inmaduro,Astringente,
AC1326	Jul2012	CRIAH12155	Costa Rica	NA	NA	Arabica	0	verde molido y tostado molido fino	h	0	Calidad HB / EP	5.0	4.0	4.0	4.0	4.0	4.0	4.5	4.0	4.0	4.0	41.5	Dulce,Inmaduro,Astringente,
AC1326	Jul2012	CRIAH12155	Costa Rica	NA	NA	Arabica	0	verde molido y tostado molido fino	h	0	Calidad HB / EP	5.0	4.0	4.0	4.0	4.0	4.0	4.5	4.0	4.0	4.0	41.5	Dulce,Inmaduro,Astringente,
AC1327	Jul2012	PERAH12156	Peru	NA	NA	Arabica	0	verde molido y tostado molido fino	h	0		5.5	5.5	5.0	5.5	5.0	5.5	5.5	5.0	6.0	5.5	54.0	Picante,Dulce,
AC1327	Jul2012	PERAH12156	Peru	NA	NA	Arabica	0	verde molido y tostado molido fino	h	0		5.5	5.5	5.0	5.5	5.0	5.5	5.5	5.0	6.0	5.5	54.0	Picante,Dulce,
AC1327	Jul2012	PERAH12156	Peru	NA	NA	Arabica	0	verde molido y tostado molido fino	h	0		5.5	5.5	5.0	5.5	5.0	5.5	5.5	5.0	6.0	5.5	54.0	Picante,Dulce,
AC1328	Jul2012	GUAAH12157	Guatemala	Ojercaibal	NA	Arabica	0	verde molido y tostado molido fino	h	0	Calidad SHB/EP	5.5	4.5	4.5	4.5	4.5	5.0	5.0	4.5	5.5	4.5	48.0	Inmaduro,Dulce,Dulce,Astringente,Dulce,
AC1328	Jul2012	GUAAH12157	Guatemala	Ojercaibal	NA	Arabica	0	verde molido y tostado molido fino	h	0	Calidad SHB/EP	5.5	4.5	4.5	4.5	4.5	5.0	5.0	4.5	5.5	4.5	48.0	Inmaduro,Dulce,Dulce,Astringente,Dulce,
AC1328	Jul2012	GUAAH12157	Guatemala	Ojercaibal	NA	Arabica	0	verde molido y tostado molido fino	h	0	Calidad SHB/EP	5.5	4.5	4.5	4.5	4.5	5.0	5.0	4.5	5.5	4.5	48.0	Inmaduro,Dulce,Dulce,Astringente,Dulce,
AC1332	Jul2012	INDRS10071	India	NA	NA	Robusta	100	verde molido y tostado molido fino	s	0	Cherry AB	2.0	1.5	2.0	2.0	1.5	1.5	4.0	2.5	2.0	2.0	21.0	Harina,Amargo,Metalico,
AC1332	Jul2012	INDRS10071	India	NA	NA	Robusta	100	verde molido y tostado molido fino	s	0	Cherry AB	2.0	1.5	2.0	2.0	1.5	1.5	4.0	2.5	2.0	2.0	21.0	Harina,Amargo,Metalico,
AC1332	Jul2012	INDRS10071	India	NA	NA	Robusta	100	verde molido y tostado molido fino	s	0	Cherry AB	2.0	1.5	2.0	2.0	1.5	1.5	4.0	2.5	2.0	2.0	21.0	Harina,Amargo,Metalico,
AC1334	Jul2012	VIERS11074	Vietnam	NA	NA	Robusta	100	verde molido y tostado molido fino	s	0		2.0	3.0	2.5	3.0	2.0	2.5	4.0	2.5	2.5	2.0	26.0	Tierra,Harina,Sucio,Astringente,Amargo,
AC1334	Jul2012	VIERS11074	Vietnam	NA	NA	Robusta	100	verde molido y tostado molido fino	s	0		2.0	3.0	2.5	3.0	2.0	2.5	4.0	2.5	2.5	2.0	26.0	Tierra,Harina,Sucio,Astringente,Amargo,
AC1334	Jul2012	VIERS11074	Vietnam	NA	NA	Robusta	100	verde molido y tostado molido fino	s	0		2.0	3.0	2.5	3.0	2.0	2.5	4.0	2.5	2.5	2.0	26.0	Tierra,Harina,Sucio,Astringente,Amargo,
AC1336	Jul2012	BRAAS12065	Brazil	NA	NA	Arabica	0	verde molido y tostado molido fino	s	0	Alfenas (sul de Minas), Bourbon semiseca	4.0	4.0	4.0	4.0	4.0	4.0	4.5	4.0	4.0	4.0	40.5	Chocolate amargo,Amargo,Astringente,Amargo,								BOURBON
AC1336	Jul2012	BRAAS12065	Brazil	NA	NA	Arabica	0	verde molido y tostado molido fino	s	0	Alfenas (sul de Minas), Bourbon semiseca	4.0	4.0	4.0	4.0	4.0	4.0	4.5	4.0	4.0	4.0	40.5	Chocolate amargo,Amargo,Astringente,Amargo,								BOURBON
AC1336	Jul2012	BRAAS12065	Brazil	NA	NA	Arabica	0	verde molido y tostado molido fino	s	0	Alfenas (sul de Minas), Bourbon semiseca	4.0	4.0	4.0	4.0	4.0	4.0	4.5	4.0	4.0	4.0	40.5	Chocolate amargo,Amargo,Astringente,Amargo,								BOURBON
AC1337	Jul2012	BRAAS10080	Brazil	NA	NA	Arabica	0	verde molido y tostado molido fino	s	0	Cerrado tipo 4/5	3.0	3.5	3.5	4.0	3.5	3.5	4.0	3.0	3.5	3.0	34.5	Tierra,Herbal,Amargo,Amargo,Inmaduro,
AC1337	Jul2012	BRAAS10080	Brazil	NA	NA	Arabica	0	verde molido y tostado molido fino	s	0	Cerrado tipo 4/5	3.0	3.5	3.5	4.0	3.5	3.5	4.0	3.0	3.5	3.0	34.5	Tierra,Herbal,Amargo,Amargo,Inmaduro,
AC1337	Jul2012	BRAAS10080	Brazil	NA	NA	Arabica	0	verde molido y tostado molido fino	s	0	Cerrado tipo 4/5	3.0	3.5	3.5	4.0	3.5	3.5	4.0	3.0	3.5	3.0	34.5	Tierra,Herbal,Amargo,Amargo,Inmaduro,
AC1338	Jul2012	BRAAS10081	Brazil	NA	NA	Arabica	0	verde molido y tostado molido fino	s	0	Cerrado tipo 2	3.0	4.0	4.0	4.5	4.0	4.0	4.0	4.0	4.5	4.0	40.0	Inmaduro,Herbal,Astringente,Dulce,Dulce,
AC1338	Jul2012	BRAAS10081	Brazil	NA	NA	Arabica	0	verde molido y tostado molido fino	s	0	Cerrado tipo 2	3.0	4.0	4.0	4.5	4.0	4.0	4.0	4.0	4.5	4.0	40.0	Inmaduro,Herbal,Astringente,Dulce,Dulce,
AC1338	Jul2012	BRAAS10081	Brazil	NA	NA	Arabica	0	verde molido y tostado molido fino	s	0	Cerrado tipo 2	3.0	4.0	4.0	4.5	4.0	4.0	4.0	4.0	4.5	4.0	40.0	Inmaduro,Herbal,Astringente,Dulce,Dulce,
AC1339	Jul2012	BRAAS10082	Brazil	Mopiana	NA	Arabica	0	verde molido y tostado molido fino	s	0	Mogiana Tipo 2	3.0	4.5	4.0	4.5	4.0	4.0	4.0	4.5	4.5	4.5	41.5	Inmaduro,Herbal,Limpio,Dulce,Limpio,								MOGIANA
AC1339	Jul2012	BRAAS10082	Brazil	Mopiana	NA	Arabica	0	verde molido y tostado molido fino	s	0	Mogiana Tipo 2	3.0	4.5	4.0	4.5	4.0	4.0	4.0	4.5	4.5	4.5	41.5	Inmaduro,Herbal,Limpio,Dulce,Limpio,								MOGIANA
AC1339	Jul2012	BRAAS10082	Brazil	Mopiana	NA	Arabica	0	verde molido y tostado molido fino	s	0	Mogiana Tipo 2	3.0	4.5	4.0	4.5	4.0	4.0	4.0	4.5	4.5	4.5	41.5	Inmaduro,Herbal,Limpio,Dulce,Limpio,								MOGIANA
AC1342	Jul2012	CMFRS10072	Costa de Marfil	NA	NA	Robusta	100	verde molido y tostado molido fino	s	0	Robusta G PN	2.0	1.5	1.5	1.5	1.5	1.5	4.0	1.5	1.5	1.5	18.0	Harina,Tierra,Tierra,
AC1342	Jul2012	CMFRS10072	Costa de Marfil	NA	NA	Robusta	100	verde molido y tostado molido fino	s	0	Robusta G PN	2.0	1.5	1.5	1.5	1.5	1.5	4.0	1.5	1.5	1.5	18.0	Harina,Tierra,Tierra,
AC1342	Jul2012	CMFRS10072	Costa de Marfil	NA	NA	Robusta	100	verde molido y tostado molido fino	s	0	Robusta G PN	2.0	1.5	1.5	1.5	1.5	1.5	4.0	1.5	1.5	1.5	18.0	Harina,Tierra,Tierra,
AC1345	80812	GUAAH12163	Guatemala	Antigua	NA	Arabica	0	verde molido y tostado molido fino	h	0		5.0	5.5	5.0	6.5	5.0	5.0	6.0	5.0	6.0	5.5	54.5	Floral,Amargo,Mieloso,Amargo,Mieloso,
AC1345	80812	GUAAH12163	Guatemala	Antigua	NA	Arabica	0	verde molido y tostado molido fino	h	0		5.0	5.5	5.0	6.5	5.0	5.0	6.0	5.0	6.0	5.5	54.5	Floral,Amargo,Mieloso,Amargo,Mieloso,
AC1345	80812	GUAAH12163	Guatemala	Antigua	NA	Arabica	0	verde molido y tostado molido fino	h	0		5.0	5.5	5.0	6.5	5.0	5.0	6.0	5.0	6.0	5.5	54.5	Floral,Amargo,Mieloso,Amargo,Mieloso,
AC1346	80812	GUAAH12164	Guatemala	Pacamara	NA	Arabica	0	verde molido y tostado molido fino	h	0		7.0	8.5	8.5	8.5	8.5	8.5	8.5	8.0	8.0	8.5	82.5	Citrico,Floral,Citrico,Floral,Floral,Citrico,
AC1346	80812	GUAAH12164	Guatemala	Pacamara	NA	Arabica	0	verde molido y tostado molido fino	h	0		7.0	8.5	8.5	8.5	8.5	8.5	8.5	8.0	8.0	8.5	82.5	Citrico,Floral,Citrico,Floral,Floral,Citrico,
AC1347	80812	GUAAH12165	Guatemala	Maracaturra	NA	Arabica	0	verde molido y tostado molido fino	h	0		6.0	8.0	7.5	8.0	7.0	7.5	8.0	7.0	8.0	8.0	75.0	Dulce,Madera,Floral,Citrico,Floral,Citrico,Madera,
AC1347	80812	GUAAH12165	Guatemala	Maracaturra	NA	Arabica	0	verde molido y tostado molido fino	h	0		6.0	8.0	7.5	8.0	7.0	7.5	8.0	7.0	8.0	8.0	75.0	Dulce,Madera,Floral,Citrico,Floral,Citrico,Madera,
AC1347	80812	GUAAH12165	Guatemala	Maracaturra	NA	Arabica	0	verde molido y tostado molido fino	h	0		6.0	8.0	7.5	8.0	7.0	7.5	8.0	7.0	8.0	8.0	75.0	Dulce,Madera,Floral,Citrico,Floral,Citrico,Madera,
AC1348	80812	GUAAH12166	Guatemala	Hueltuetenango	NA	Arabica	0	verde molido y tostado molido fino	h	0		5.5	7.0	6.5	7.0	5.5	6.0	6.5	6.5	6.0	6.5	63.0	Chocolate dulce,Suave,Suave,Inmaduro,
AC1348	80812	GUAAH12166	Guatemala	Hueltuetenango	NA	Arabica	0	verde molido y tostado molido fino	h	0		5.5	7.0	6.5	7.0	5.5	6.0	6.5	6.5	6.0	6.5	63.0	Chocolate dulce,Suave,Suave,Inmaduro,
AC1348	80812	GUAAH12166	Guatemala	Hueltuetenango	NA	Arabica	0	verde molido y tostado molido fino	h	0		5.5	7.0	6.5	7.0	5.5	6.0	6.5	6.5	6.0	6.5	63.0	Chocolate dulce,Suave,Suave,Inmaduro,
AC1349	80812	GUAAH12167	Guatemala	Atitlan	NA	Arabica	0	verde molido y tostado molido fino	h	0		6.5	7.5	7.0	8.0	7.0	8.0	8.0	7.5	7.0	8.0	74.5	Chocolate dulce,Suave,Limpio,Limpio,Suave,
AC1349	80812	GUAAH12167	Guatemala	Atitlan	NA	Arabica	0	verde molido y tostado molido fino	h	0		6.5	7.5	7.0	8.0	7.0	8.0	8.0	7.5	7.0	8.0	74.5	Chocolate dulce,Suave,Limpio,Limpio,Suave,
AC1349	80812	GUAAH12167	Guatemala	Atitlan	NA	Arabica	0	verde molido y tostado molido fino	h	0		6.5	7.5	7.0	8.0	7.0	8.0	8.0	7.5	7.0	8.0	74.5	Chocolate dulce,Suave,Limpio,Limpio,Suave,
AC1353	80812	CTIAH12172	Colombia	Cauca	Timbio	100% ARABICA COLOMBIA	0	verde molido y tostado molido fino	h	0	Altura 1850msnm,var. Castillo, Pedro Piamba	4.5	6.0	5.5	7.5	6.0	6.0	5.5	5.0	6.5	6.0	58.5	Moho,Picante,Astringente,					1850			CASTILLO(100)
AC1353	80812	CTIAH12172	Colombia	Cauca	Timbio	100% ARABICA COLOMBIA	0	verde molido y tostado molido fino	h	0	Altura 1850msnm,var. Castillo, Pedro Piamba	4.5	6.0	5.5	7.5	6.0	6.0	5.5	5.0	6.5	6.0	58.5	Moho,Picante,Astringente,					1850			CASTILLO(100)
AC1353	80812	CTIAH12172	Colombia	Cauca	Timbio	100% ARABICA COLOMBIA	0	verde molido y tostado molido fino	h	0	Altura 1850msnm,var. Castillo, Pedro Piamba	4.5	6.0	5.5	7.5	6.0	6.0	5.5	5.0	6.5	6.0	58.5	Moho,Picante,Astringente,					1850			CASTILLO(100)
AC1354	80812	CPIAH12173	Colombia	Cauca	Piendamo	100% ARABICA COLOMBIA	0	verde molido y tostado molido fino	h	0	Altura 1700msnm,var. Castillo, Ya Vuelvo, Juan A. Sarria	4.5	5.5	5.0	6.0	5.0	4.5	5.0	5.0	6.0	5.5	52.0	Chocolate amargo,Mieloso,Astringente,Mieloso,Astringente,					1700			CASTILLO(100)
AC1354	80812	CPIAH12173	Colombia	Cauca	Piendamo	100% ARABICA COLOMBIA	0	verde molido y tostado molido fino	h	0	Altura 1700msnm,var. Castillo, Ya Vuelvo, Juan A. Sarria	4.5	5.5	5.0	6.0	5.0	4.5	5.0	5.0	6.0	5.5	52.0	Chocolate amargo,Mieloso,Astringente,Mieloso,Astringente,					1700			CASTILLO(100)
AC1354	80812	CPIAH12173	Colombia	Cauca	Piendamo	100% ARABICA COLOMBIA	0	verde molido y tostado molido fino	h	0	Altura 1700msnm,var. Castillo, Ya Vuelvo, Juan A. Sarria	4.5	5.5	5.0	6.0	5.0	4.5	5.0	5.0	6.0	5.5	52.0	Chocolate amargo,Mieloso,Astringente,Mieloso,Astringente,					1700			CASTILLO(100)
AC1355	80812	CPIAH12174	Colombia	Cauca	Piendamo	100% ARABICA COLOMBIA	0	verde molido y tostado molido fino	h	0	Altura 1700msnm,var. Castillo, La Fortuna, Ofir Morera	4.5	5.0	5.0	6.0	4.0	4.5	4.5	4.0	5.5	5.0	48.0	Chocolate amargo,Mieloso,Astringente,Mieloso,Astringente,					1700			CASTILLO(100)
AC1355	80812	CPIAH12174	Colombia	Cauca	Piendamo	100% ARABICA COLOMBIA	0	verde molido y tostado molido fino	h	0	Altura 1700msnm,var. Castillo, La Fortuna, Ofir Morera	4.5	5.0	5.0	6.0	4.0	4.5	4.5	4.0	5.5	5.0	48.0	Chocolate amargo,Mieloso,Astringente,Mieloso,Astringente,					1700			CASTILLO(100)
AC1355	80812	CPIAH12174	Colombia	Cauca	Piendamo	100% ARABICA COLOMBIA	0	verde molido y tostado molido fino	h	0	Altura 1700msnm,var. Castillo, La Fortuna, Ofir Morera	4.5	5.0	5.0	6.0	4.0	4.5	4.5	4.0	5.5	5.0	48.0	Chocolate amargo,Mieloso,Astringente,Mieloso,Astringente,					1700			CASTILLO(100)
AC1356	80812	CPIAH12175	Colombia	Cauca	Piendamo	100% ARABICA COLOMBIA	0	verde molido y tostado molido fino	h	0	Altura 1650msnm,var. Castillo, Las Veraneras, Norberto Mosquera	5.5	6.5	6.0	6.5	6.0	6.0	6.0	6.0	6.0	6.0	60.5	Dulce,Citrico,Suave,Citrico,Citrico,					1650			CASTILLO(100)
AC1356	80812	CPIAH12175	Colombia	Cauca	Piendamo	100% ARABICA COLOMBIA	0	verde molido y tostado molido fino	h	0	Altura 1650msnm,var. Castillo, Las Veraneras, Norberto Mosquera	5.5	6.5	6.0	6.5	6.0	6.0	6.0	6.0	6.0	6.0	60.5	Dulce,Citrico,Suave,Citrico,Citrico,					1650			CASTILLO(100)
AC1356	80812	CPIAH12175	Colombia	Cauca	Piendamo	100% ARABICA COLOMBIA	0	verde molido y tostado molido fino	h	0	Altura 1650msnm,var. Castillo, Las Veraneras, Norberto Mosquera	5.5	6.5	6.0	6.5	6.0	6.0	6.0	6.0	6.0	6.0	60.5	Dulce,Citrico,Suave,Citrico,Citrico,					1650			CASTILLO(100)
AC1358	80812	CPIAH12177	Colombia	Cauca	Piendamo	100% ARABICA COLOMBIA	0	verde molido y tostado molido fino	h	0	Altura 1650msnm,var. Castillo, Fredy C. Mosquera	5.5	5.5	5.5	6.5	5.5	6.0	6.0	6.0	6.5	6.0	59.0	Chocolate dulce,Dulce,Dulce,					1650			CASTILLO(100)
AC1358	80812	CPIAH12177	Colombia	Cauca	Piendamo	100% ARABICA COLOMBIA	0	verde molido y tostado molido fino	h	0	Altura 1650msnm,var. Castillo, Fredy C. Mosquera	5.5	5.5	5.5	6.5	5.5	6.0	6.0	6.0	6.5	6.0	59.0	Chocolate dulce,Dulce,Dulce,					1650			CASTILLO(100)
AC1358	80812	CPIAH12177	Colombia	Cauca	Piendamo	100% ARABICA COLOMBIA	0	verde molido y tostado molido fino	h	0	Altura 1650msnm,var. Castillo, Fredy C. Mosquera	5.5	5.5	5.5	6.5	5.5	6.0	6.0	6.0	6.5	6.0	59.0	Chocolate dulce,Dulce,Dulce,					1650			CASTILLO(100)
AC1375	180213	BRAA?12187	Brazil	NA	NA	Arabica	0	tostado molido fino	unknown	0	Bourbon rojo	4.5	4	4	4.5	4	4	5	4	4	4	42	cereal, limpio								BOURBON
AC1375	180213	BRAA?12187	Brazil	NA	NA	Arabica	0	tostado molido fino	unknown	0	Bourbon rojo	4.5	4	4	4.5	4	4	5	4	4	4	42	cereal, limpio								BOURBON
AC1375	180213	BRAA?12187	Brazil	NA	NA	Arabica	0	tostado molido fino	unknown	0	Bourbon rojo	4.5	4	4	4.5	4	4	5	4	4	4	42	cereal, limpio								BOURBON
AC1376	180213	CRIAH12188	Costa Rica	NA	NA	Arabica	0	tostado molido fino	h	0	Borbon amarillo	3.5	4.5	4.5	5.5	4.5	4.5	5	4.5	5.5	5	47	dulce, seco								BOURBON
AC1376	180213	CRIAH12188	Costa Rica	NA	NA	Arabica	0	tostado molido fino	h	0	Borbon amarillo	3.5	4.5	4.5	5.5	4.5	4.5	5	4.5	5.5	5	47	dulce, seco								BOURBON
AC1376	180213	CRIAH12188	Costa Rica	NA	NA	Arabica	0	tostado molido fino	h	0	Borbon amarillo	3.5	4.5	4.5	5.5	4.5	4.5	5	4.5	5.5	5	47	dulce, seco								BOURBON
AC1377	180213	PERAH12189	Peru	NA	NA	Arabica	0	tostado molido fino	h	0	Tipo MCM	5	4	4.5	5	4.5	4.5	5	5	5	5	47,5	dulce, horse
AC1377	180213	PERAH12189	Peru	NA	NA	Arabica	0	tostado molido fino	h	0	Tipo MCM	5	4	4.5	5	4.5	4.5	5	5	5	5	47,5	dulce, horse
AC1377	180213	PERAH12189	Peru	NA	NA	Arabica	0	tostado molido fino	h	0	Tipo MCM	5	4	4.5	5	4.5	4.5	5	5	5	5	47,5	dulce, horse
AC1379	180213	CRIAH12191	Costa Rica	NA	NA	Arabica	0	tostado molido fino	h	0	Strictly High Ground	5	5	5	5	5	5.5	5.5	6	5	5.5	52,5	suave, limpia
AC1379	180213	CRIAH12191	Costa Rica	NA	NA	Arabica	0	tostado molido fino	h	0	Strictly High Ground	5	5	5	5	5	5.5	5.5	6	5	5.5	52,5	suave, limpia
AC1379	180213	CRIAH12191	Costa Rica	NA	NA	Arabica	0	tostado molido fino	h	0	Strictly High Ground	5	5	5	5	5	5.5	5.5	6	5	5.5	52,5	suave, limpia
AC1380	180213	BRAAH12192	Brazil	NA	NA	Arabica	0	tostado molido fino	h	0	Bourbon. Muestra antigua BRAAH12012	3	5	5	5	4.5	5	5	4.5	4.5	5.5	47	floral
AC1380	180213	BRAAH12192	Brazil	NA	NA	Arabica	0	tostado molido fino	h	0	Bourbon. Muestra antigua BRAAH12012	3	5	5	5	4.5	5	5	4.5	4.5	5.5	47	floral
AC1380	180213	BRAAH12192	Brazil	NA	NA	Arabica	0	tostado molido fino	h	0	Bourbon. Muestra antigua BRAAH12012	3	5	5	5	4.5	5	5	4.5	4.5	5.5	47	floral
AC1382	180213	GUAAH12194	Guatemala	Hueltuetenango	NA	Arabica	0	tostado molido fino	h	0	Huehuetenango. Bourbon	4.5	6	6	6	5	6	5.5	5.5	6	6	56,5	dulce, balance								BOURBON
AC1382	180213	GUAAH12194	Guatemala	Hueltuetenango	NA	Arabica	0	tostado molido fino	h	0	Huehuetenango. Bourbon	4.5	6	6	6	5	6	5.5	5.5	6	6	56,5	dulce, balance								BOURBON
AC1382	180213	GUAAH12194	Guatemala	Hueltuetenango	NA	Arabica	0	tostado molido fino	h	0	Huehuetenango. Bourbon	4.5	6	6	6	5	6	5.5	5.5	6	6	56,5	dulce, balance								BOURBON
AC1387	180213	PERAH12199	Peru	NA	NA	Arabica	0	tostado molido fino	h	0		3.5	2	2	3	2	2	4	2.5	3	2	26	seca, fermento, herbal
AC1387	180213	PERAH12199	Peru	NA	NA	Arabica	0	tostado molido fino	h	0		3.5	2	2	3	2	2	4	2.5	3	2	26	seca, fermento, herbal
AC1387	180213	PERAH12199	Peru	NA	NA	Arabica	0	tostado molido fino	h	0		3.5	2	2	3	2	2	4	2.5	3	2	26	seca, fermento, herbal
AC1388	180213	PERAH12200	Peru	NA	NA	Arabica	0	tostado molido fino	h	0		3	4	4	4	4	4	5	4	4	4	40	seco, herbal, inmaduro
AC1388	180213	PERAH12200	Peru	NA	NA	Arabica	0	tostado molido fino	h	0		3	4	4	4	4	4	5	4	4	4	40	seco, herbal, inmaduro
AC1388	180213	PERAH12200	Peru	NA	NA	Arabica	0	tostado molido fino	h	0		3	4	4	4	4	4	5	4	4	4	40	seco, herbal, inmaduro
AC1389	180213	VIERS12201	Vietnam	NA	NA	Robusta	100	tostado molido fino	s	0	Green Coffee Robusta	2.5	3	3	4	3	3	4	3	3	3	31,5	harina
AC1389	180213	VIERS12201	Vietnam	NA	NA	Robusta	100	tostado molido fino	s	0	Green Coffee Robusta	2.5	3	3	4	3	3	4	3	3	3	31,5	harina
AC1389	180213	VIERS12201	Vietnam	NA	NA	Robusta	100	tostado molido fino	s	0	Green Coffee Robusta	2.5	3	3	4	3	3	4	3	3	3	31,5	harina
AC1394	180213	GUALH12206	Guatemala	NA	NA	Arabica	0	tostado molido fino	h	0	Laurina	4	4	4	4	4	4.5	6	6	4	4	44,5	insipida, limpia								LAURINA
AC1394	180213	GUALH12206	Guatemala	NA	NA	Arabica	0	tostado molido fino	h	0	Laurina	4	4	4	4	4	4.5	6	6	4	4	44,5	insipida, limpia								LAURINA
AC1394	180213	GUALH12206	Guatemala	NA	NA	Arabica	0	tostado molido fino	h	0	Laurina	4	4	4	4	4	4.5	6	6	4	4	44,5	insipida, limpia								LAURINA
AC1395	180213	GUALH12207	Guatemala	NA	NA	Arabica	0	tostado molido fino	h	0	Laurina	4	5	4.5	5.5	4	4	5	5	4.5	5	46,5	insipida, limpia								LAURINA
AC1395	180213	GUALH12207	Guatemala	NA	NA	Arabica	0	tostado molido fino	h	0	Laurina	4	5	4.5	5.5	4	4	5	5	4.5	5	46,5	insipida, limpia								LAURINA
AC1395	180213	GUALH12207	Guatemala	NA	NA	Arabica	0	tostado molido fino	h	0	Laurina	4	5	4.5	5.5	4	4	5	5	4.5	5	46,5	insipida, limpia								LAURINA
AC1403	190313	PERAH12212	Peru	NA	NA	Arabica	0	tostado molido fino	h	0	G1
AC1403	190313	PERAH12212	Peru	NA	NA	Arabica	0	tostado molido fino	h	0	G1
AC1403	190313	PERAH12212	Peru	NA	NA	Arabica	0	tostado molido fino	h	0	G1
AC1404	190313	GUAAH12213	Guatemala	NA	NA	Arabica	0	tostado molido fino	h	0	SHG
AC1404	190313	GUAAH12213	Guatemala	NA	NA	Arabica	0	tostado molido fino	h	0	SHG
AC1404	190313	GUAAH12213	Guatemala	NA	NA	Arabica	0	tostado molido fino	h	0	SHG
AC1405	190313	GUAAH12214	Guatemala	NA	NA	Arabica	0	tostado molido fino	h	0
AC1405	190313	GUAAH12214	Guatemala	NA	NA	Arabica	0	tostado molido fino	h	0
AC1405	190313	GUAAH12214	Guatemala	NA	NA	Arabica	0	tostado molido fino	h	0
AC1406	190313	BRAA?12215	Brazil	NA	NA	Arabica	0	tostado molido fino	unknown	0
AC1406	190313	BRAA?12215	Brazil	NA	NA	Arabica	0	tostado molido fino	unknown	0
AC1406	190313	BRAA?12215	Brazil	NA	NA	Arabica	0	tostado molido fino	unknown	0
AC1407	190313	PERAH12216	Peru	NA	NA	Arabica	0	tostado molido fino	h	0
AC1407	190313	PERAH12216	Peru	NA	NA	Arabica	0	tostado molido fino	h	0
AC1407	190313	PERAH12216	Peru	NA	NA	Arabica	0	tostado molido fino	h	0
AC1409	190313	CRIAH12218	Costa Rica	NA	NA	Arabica	0	tostado molido fino	h	0
AC1409	190313	CRIAH12218	Costa Rica	NA	NA	Arabica	0	tostado molido fino	h	0
AC1409	190313	CRIAH12218	Costa Rica	NA	NA	Arabica	0	tostado molido fino	h	0
AC1412	190313	PERAH12221	Peru	NA	NA	Arabica	0	tostado molido fino	h	0
AC1412	190313	PERAH12221	Peru	NA	NA	Arabica	0	tostado molido fino	h	0
AC1412	190313	PERAH12221	Peru	NA	NA	Arabica	0	tostado molido fino	h	0
AC1413	190313	GUAAH12222	Guatemala	NA	NA	Arabica	0	tostado molido fino	h	0
AC1413	190313	GUAAH12222	Guatemala	NA	NA	Arabica	0	tostado molido fino	h	0
AC1413	190313	GUAAH12222	Guatemala	NA	NA	Arabica	0	tostado molido fino	h	0
AC1414	190313	VIERS12223	Vietnam	NA	NA	Robusta	100	tostado molido fino	s	0	polished
AC1414	190313	VIERS12223	Vietnam	NA	NA	Robusta	100	tostado molido fino	s	0	polished
AC1414	190313	VIERS12223	Vietnam	NA	NA	Robusta	100	tostado molido fino	s	0	polished
AC1420	90413	PERAH12230	Peru	NA	NA	Arabica	0	tostado molido fino	h	0	Perú	4.5	3.5	3.5	4	4	4.5	4	4	4.5	4	40.5	astringente, inmaduro
AC1420	90413	PERAH12230	Peru	NA	NA	Arabica	0	tostado molido fino	h	0	Perú	4.5	3.5	3.5	4	4	4.5	4	4	4.5	4	40.5	astringente, inmaduro
AC1420	90413	PERAH12230	Peru	NA	NA	Arabica	0	tostado molido fino	h	0	Perú	4.5	3.5	3.5	4	4	4.5	4	4	4.5	4	40.5	astringente, inmaduro
AC1421	90413	GUAAH12231	Guatemala	NA	NA	Arabica	0	tostado molido fino	h	0	Guatemala Arabica	4	4	3.5	4	3.5	4	4	3.5	4.5	3.5	38.5	reposo, citrico
AC1421	90413	GUAAH12231	Guatemala	NA	NA	Arabica	0	tostado molido fino	h	0	Guatemala Arabica	4	4	3.5	4	3.5	4	4	3.5	4.5	3.5	38.5	reposo, citrico
AC1421	90413	GUAAH12231	Guatemala	NA	NA	Arabica	0	tostado molido fino	h	0	Guatemala Arabica	4	4	3.5	4	3.5	4	4	3.5	4.5	3.5	38.5	reposo, citrico
AC1424	90413	CRIAH12234	Costa Rica	NA	NA	Arabica	0	tostado molido fino	h	0	Costa Rica	5.5	4.5	4	4.5	4	4	4.5	4	4	4	43	platano verde, vegetal seco
AC1424	90413	CRIAH12234	Costa Rica	NA	NA	Arabica	0	tostado molido fino	h	0	Costa Rica	5.5	4.5	4	4.5	4	4	4.5	4	4	4	43	platano verde, vegetal seco
AC1424	90413	CRIAH12234	Costa Rica	NA	NA	Arabica	0	tostado molido fino	h	0	Costa Rica	5.5	4.5	4	4.5	4	4	4.5	4	4	4	43	platano verde, vegetal seco
AC1427	90413	PERAH13238	Peru	NA	NA	Arabica	0	tostado molido fino	h	0	Perú	4	3.5	3.5	4	4	3.5	4	3.5	3.5	3.5	37	astringente
AC1427	90413	PERAH13238	Peru	NA	NA	Arabica	0	tostado molido fino	h	0	Perú	4	3.5	3.5	4	4	3.5	4	3.5	3.5	3.5	37	astringente
AC1427	90413	PERAH13238	Peru	NA	NA	Arabica	0	tostado molido fino	h	0	Perú	4	3.5	3.5	4	4	3.5	4	3.5	3.5	3.5	37	astringente
AC1428	90413	PERAH13239	Peru	NA	NA	Arabica	0	tostado molido fino	h	0	Perú	4	4	4	4	4	4	4.5	4	3.5	4	40	amargo
AC1428	90413	PERAH13239	Peru	NA	NA	Arabica	0	tostado molido fino	h	0	Perú	4	4	4	4	4	4	4.5	4	3.5	4	40	amargo
AC1428	90413	PERAH13239	Peru	NA	NA	Arabica	0	tostado molido fino	h	0	Perú	4	4	4	4	4	4	4.5	4	3.5	4	40	amargo
AC1431	90413	GUAAH13235	Guatemala	NA	NA	Arabica	0	tostado molido fino	h	0	Guatemala; Huehue	7	5	4.5	4.5	4.5	4.5	5	4.5	4.5	4.5	48.5	cereal
AC1431	90413	GUAAH13235	Guatemala	NA	NA	Arabica	0	tostado molido fino	h	0	Guatemala; Huehue	7	5	4.5	4.5	4.5	4.5	5	4.5	4.5	4.5	48.5	cereal
AC1431	90413	GUAAH13235	Guatemala	NA	NA	Arabica	0	tostado molido fino	h	0	Guatemala; Huehue	7	5	4.5	4.5	4.5	4.5	5	4.5	4.5	4.5	48.5	cereal
AC1432	90413	GUAAH13236	Guatemala	NA	NA	Arabica	0	tostado molido fino	h	0	Guatemala, Antigua	5	6	6	6	6.5	6.5	6	6	6.5	6.5	61	citrico
AC1432	90413	GUAAH13236	Guatemala	NA	NA	Arabica	0	tostado molido fino	h	0	Guatemala, Antigua	5	6	6	6	6.5	6.5	6	6	6.5	6.5	61	citrico
AC1432	90413	GUAAH13236	Guatemala	NA	NA	Arabica	0	tostado molido fino	h	0	Guatemala, Antigua	5	6	6	6	6.5	6.5	6	6	6.5	6.5	61	citrico
AC1436	150413	CPOAH13245	Colombia	Cauca	Popayan	100% ARABICA COLOMBIA	0	tostado molido fino	h	0	Colombia - Cauca/Meseta Caucana	4	4	4.5	5	4.5	4	4.5	4.5	6.5	4.5	46	frutal, inmaduro
AC1436	150413	CPOAH13245	Colombia	Cauca	Popayan	100% ARABICA COLOMBIA	0	tostado molido fino	h	0	Colombia - Cauca/Meseta Caucana	4	4	4.5	5	4.5	4	4.5	4.5	6.5	4.5	46	frutal, inmaduro
AC1436	150413	CPOAH13245	Colombia	Cauca	Popayan	100% ARABICA COLOMBIA	0	tostado molido fino	h	0	Colombia - Cauca/Meseta Caucana	4	4	4.5	5	4.5	4	4.5	4.5	6.5	4.5	46	frutal, inmaduro
AC1437	150413	CINAH13246	Colombia	Cauca	Inza	100% ARABICA COLOMBIA	0	tostado molido fino	h	0	Colombia-Cauca/Inzá	5.5	7	6.5	6.5	6.5	7	7	6.5	7	7.5	67	floral, dulce
AC1437	150413	CINAH13246	Colombia	Cauca	Inza	100% ARABICA COLOMBIA	0	tostado molido fino	h	0	Colombia-Cauca/Inzá	5.5	7	6.5	6.5	6.5	7	7	6.5	7	7.5	67	floral, dulce
AC1437	150413	CINAH13246	Colombia	Cauca	Inza	100% ARABICA COLOMBIA	0	tostado molido fino	h	0	Colombia-Cauca/Inzá	5.5	7	6.5	6.5	6.5	7	7	6.5	7	7.5	67	floral, dulce
AC1441	150413	CSSAH13250	Colombia	Cauca	San Sebastian	100% ARABICA COLOMBIA	0	tostado molido fino	h	0	Colombia-Cauca/San Sebastián	3.5	4	4	4	4	4.5	4	4	4.5	4	40.5	Madera
AC1441	150413	CSSAH13250	Colombia	Cauca	San Sebastian	100% ARABICA COLOMBIA	0	tostado molido fino	h	0	Colombia-Cauca/San Sebastián	3.5	4	4	4	4	4.5	4	4	4.5	4	40.5	Madera
AC1441	150413	CSSAH13250	Colombia	Cauca	San Sebastian	100% ARABICA COLOMBIA	0	tostado molido fino	h	0	Colombia-Cauca/San Sebastián	3.5	4	4	4	4	4.5	4	4	4.5	4	40.5	Madera
AC1445	150413	MSMAH13254	Colombia	Magdalena	Santa Marta	100% ARABICA COLOMBIA	0	tostado molido fino	h	0	Santa Marta / vereda el oriente, 1133msnm, castillo	4.5	4.5	4.5	5	4	4.5	5	4.5	5	4.5	46	herbal					1133			CASTILLO(100)
AC1445	150413	MSMAH13254	Colombia	Magdalena	Santa Marta	100% ARABICA COLOMBIA	0	tostado molido fino	h	0	Santa Marta / vereda el oriente, 1133msnm, castillo	4.5	4.5	4.5	5	4	4.5	5	4.5	5	4.5	46	herbal					1133			CASTILLO(100)
AC1445	150413	MSMAH13254	Colombia	Magdalena	Santa Marta	100% ARABICA COLOMBIA	0	tostado molido fino	h	0	Santa Marta / vereda el oriente, 1133msnm, castillo	4.5	4.5	4.5	5	4	4.5	5	4.5	5	4.5	46	herbal					1133			CASTILLO(100)
AC1199	290312	HACAH12052	Colombia	Huila	Acevedo	100% ARABICA COLOMBIA	0	tostado molido y verde molido	h	0	Neiva	5.0	5.0	4.5	5.0	4.5	4.5	5.0	4.5	5.0	4.5	47.5	Chocolate dulce,Astringente,Herbal,Amargo,
AC1199	290312	HACAH12052	Colombia	Huila	Acevedo	100% ARABICA COLOMBIA	0	tostado molido y verde molido	h	0	Neiva	5.0	5.0	4.5	5.0	4.5	4.5	5.0	4.5	5.0	4.5	47.5	Chocolate dulce,Astringente,Herbal,Amargo,
AC1199	290312	HACAH12052	Colombia	Huila	Acevedo	100% ARABICA COLOMBIA	0	tostado molido y verde molido	h	0	Neiva	5.0	5.0	4.5	5.0	4.5	4.5	5.0	4.5	5.0	4.5	47.5	Chocolate dulce,Astringente,Herbal,Amargo,
AC1242	Jun2012	NUNAH12032	Colombia	Narino	Union	100% ARABICA COLOMBIA	0	verde molido y tostado molido fino	h	0	Almendra especial, 250 s/s	4.5	5.0	4.5	5.0	4.5	5.0	5.0	5.0	5.5	5.0	49.0	Chocolate amargo,Mieloso,Amargo,
AC1242	Jun2012	NUNAH12032	Colombia	Narino	Union	100% ARABICA COLOMBIA	0	verde molido y tostado molido fino	h	0	Almendra especial, 250 s/s	4.5	5.0	4.5	5.0	4.5	5.0	5.0	5.0	5.5	5.0	49.0	Chocolate amargo,Mieloso,Amargo,
AC1242	Jun2012	NUNAH12032	Colombia	Narino	Union	100% ARABICA COLOMBIA	0	verde molido y tostado molido fino	h	0	Almendra especial, 250 s/s	4.5	5.0	4.5	5.0	4.5	5.0	5.0	5.0	5.5	5.0	49.0	Chocolate amargo,Mieloso,Amargo,
[truncated: 4 more columns]
