# Supplementary material for: Comparison of Attenuated Total Reflectance Mid-Infrared, Near Infrared, and 1H-Nuclear Magnetic Resonance Spectroscopies for the Determination of Coffee's Geographical Origin
Source: Int J Anal Chem. 2017 Nov 1;2017:7210463. doi: 10.1155/2017/7210463 (PMC5672123; doi:10.1155/2017/7210463)
Supplement: Supplementary file 1 — The supplementary material contains the original spectra and the necessary R scripts, as a zip file, to reproduce the results presented in this manuscript. [file 7210463.f1.zip › coffee-profiler-master/data/mIRspectra.csv]

839306880 839402496 839488000 839544128 839555904 839526720 839474880 839428032 839410624 839432128 839481152 839532672 839560448 839551552 839513920 839479232 839492096 839603072 839838464 840186624 840596672 841013888 841407104 841781760 842166272 842592384 843083584 843642944 844254144 844883584 845498432 846072448 846593152 847060416 847478592 847853120 848186880 848484672 848755648 849012288…
837026880 837220352 837428160 837634880 837820416 837968448 838069312 838122880 838133568 838108800 838051008 837960000 837836608 837687680 837533312 837413952 837380224 837491008 837782144 838241984 838808192 839401984 839966144 840482112 840964864 841442112 841939648 842469760 843030272 843605568 844178944 844737728 845277312 845800000 846308352 846800000 847269440 847707776 848110016 848475264…
832905216 833197888 833453760 833655232 833789312 833851264 833849728 833800384 833724032 833638144 833550464 833462144 833373312 833291648 833239360 833255168 833384768 833667200 834106432 834656448 835233280 835760640 836207552 836592000 836961088 837367424 837850816 838425920 839080640 839779840 840481728 841149184 841760256 842310656 842807104 843259840 843676288 844062976 844423616 844761344…
845413760 845589952 845744320 845861120 845927360 845940416 845910784 845856064 845793472 845732928 845668800 845589568 845485312 845359680 845237760 845168704 845212224 845423808 845817024 846343360 846901568 847394112 847773824 848054912 848288896 848536256 848847424 849247616 849735872 850287680 850870464 851454464 852021504 852566080 853086976 853580928 854040000 854452800 854810624 855113344…
833596736 833649280 833667136 833635456 833546048 833401664 833211968 832992192 832758464 832523904 832296704 832084032 831899264 831762368 831707136 831773248 831993024 832372416 832865856 833384704 833826816 834137856 834329984 834468544 834632192 834884416 835264896 835778112 836399488 837083520 837781760 838457024 839086912 839665984 840193728 840669760 841089920 841451264 841756160 842012800…
816782656 816904896 816980416 817021120 817033536 817024320 816998592 816961920 816917824 816866944 816807488 816737280 816660544 816593216 816566464 816627328 816823296 817187712 817708224 818317504 818912384 819411840 819793344 820091904 820373312 820702528 821129472 821674432 822328192 823055104 823811328 824554368 825255936 825905536 826502656 827051264 827554560 828016000 828439616 828831232…
853613312 853629312 853651072 853675776 853694208 853696768 853675904 853628608 853553088 853449536 853317440 853157184 852975488 852787776 852624192 852529152 852551744 852732672 853080768 853557760 854088896 854599744 855051520 855443200 855803840 856169984 856569664 857015232 857499520 858001856 858500352 858979904 859434816 859869376 860288000 860690688 861071808 861420160 861726464 861988160…
849678656 849787072 849888384 849988544 850088448 850188352 850287040 850382848 850472128 850541376 850574016 850550592 850459264 850305728 850118464 849952192 849875136 849961728 850253888 850735680 851334528 851957696 852539776 853059136 853534912 854002816 854499712 855044800 855636288 856253120 856864448 857442624 857969280 858438592 858853312 859219968 859544896 859834496 860096832 860340672…
819119424 819328256 819515840 819657728 819739904 819763776 819747392 819717504 819700480 819706496 819727040 819740992 819728000 819683904 819630912 819616576 819703680 819951616 820379200 820948864 821574784 822169408 822688128 823137024 823559040 824005248 824518656 825117504 825793536 826517504 827253120 827970112 828651072 829290560 829889024 830445120 830954048 831409664 831809408 832156800…
862338112 862129920 861929792 861780288 861703488 861705408 861779200 861909632 862072704 862234560 862360896 862420288 862393344 862279488 862097920 861889024 861707008 861616128 861669248 861880576 862224320 862650688 863116736 863603200 864112256 864651264 865221696 865809152 866384640 866911680 867363328 867732032 868032064 868293376 868550400 868831552 869150784 869507776 869890944 870283072…
873177472 873367616 873522816 873620864 873646912 873599104 873489216 873338240 873169024 873001792 872845504 872703552 872579584 872482880 872435456 872470336 872620032 872903232 873302336 873758720 874194688 874553536 874825536 875042624 875253888 875503232 875820032 876207168 876648768 877113088 877568576 877992448 878376128 878721088 879033408 879317760 879574336 879801792 880002432 880180160…
811808320 811763200 811666944 811526848 811355456 811168448 810981504 810806272 810646976 810499008 810354944 810209280 810068736 809956352 809911104 809983296 810214720 810617600 811148480 811715392 812209152 812568640 812804288 812983232 813191296 813499072 813948224 814539776 815239424 815986304 816720576 817398976 818003648 818541248 819029184 819482560 819906944 820299520 820654080 820967232…
844147008 844220096 844289856 844343104 844366464 844352768 844304064 844231552 844146496 844054784 843951488 843824896 843663552 843467584 843253952 843062656 842945728 842961024 843143104 843480128 843916416 844383040 844835072 845263232 845687168 846136384 846633536 847183488 847773440 848375552 848962112 849513408 850021568 850489856 850923392 851325312 851693376 852025856 852323904 852594816…
806243264 806399936 806571456 806748864 806908736 807022784 807071232 807052864 806977664 806862272 806719232 806552192 806363648 806162432 805974272 805849472 805852224 806046016 806458176 807052672 807735296 808405248 809003456 809528512 810020928 810533568 811110912 811771392 812505408 813279936 814057472 814807680 815518144 816189888 816830016 817439808 818012160 818533312 818990656 819379904…
840693888 841000896 841270144 841492416 841665408 841800384 841921536 842051456 842203264 842367808 842516736 842612544 842626432 842552576 842417280 842280320 842222912 842332672 842666176 843210368 843886272 844587776 845239424 845814272 846330880 846827008 847338944 847888000 848476352 849089024 849704384 850301824 850867520 851395648 851884992 852333824 852742464 853112384 853449728 853764352…
820446400 820623040 820922176 821240448 821481088 821582720 821539072 821394752 821218816 821071232 820976128 820917760 820857088 820761408 820622656 820473728 820382464 820434432 820686720 821129600 821681536 822231872 822706496 823090112 823424896 823778240 824218496 824785408 825478592 826254912 827047872 827791872 828441472 828987520 829449664 829863296 830261056 830661952 831066752 831459584…
810095808 810466624 810846336 811190656 811456064 811610944 811642432 811558976 811385728 811154240 810889792 810612800 810339520 810089408 809896320 809809728 809882560 810153792 810616448 811205888 811817600 812361728 812803776 813167552 813511552 813898112 814376448 814965376 815653696 816405568 817177728 817931200 818639424 819289152 819873344 820387520 820828480 821199296 821513984 821795520…
772524032 772578944 772628928 772681472 772729664 772762432 772774592 772765760 772739392 772694848 772621248 772502528 772325888 772095936 771845568 771640640 771566592 771713344 772127232 772778560 773563072 774356736 775078656 775709248 776281536 776847744 777457344 778134592 778875200 779652352 780431360 781184768 781898880 782573568 783215232 783828480 784412032 784963456 785483392 785977280…
767878656 767862336 767895040 767981184 768098304 768213376 768292672 768314496 768274048 768173248 768016576 767807168 767551040 767264768 766986304 766780800 766726464 766900992 767334592 767983168 768737280 769476480 770128128 770683648 771187776 771702656 772284800 772961344 773724224 774534848 775343936 776108544 776804736 777430272 777996672 778519104 779008704 779472576 779917056 780348352…
801475904 801444544 801432064 801435776 801437120 801407552 801322560 801169024 800950272 800681536 800382208 800073344 799777152 799515712 799319360 799226368 799269440 799463424 799784704 800170688 800542016 800847040 801083584 801294464 801542528 801881920 802345280 802931840 803609472 804326016 805030208 805685440 806276672 806807552 807286784 807721408 808112576 808459264 808764544 809038336…
806379136 806351680 806320704 806293184 806257856 806199040 806108096 805986688 805845952 805699584 805551616 805399104 805235648 805063488 804901632 804790976 804780096 804917248 805215808 805639680 806115904 806575104 806985408 807362112 807748928 808191616 808721920 809342656 810027520 810732224 811413120 812041536 812610496 813129024 813610688 814063808 814488000 814877312 815229248 815547712…
833080704 833143680 833156992 833116864 833024832 832883840 832711488 832530048 832361536 832217536 832094272 831974464 831838080 831677568 831504448 831354688 831277824 831324672 831518848 831837376 832218752 832594880 832927872 833216768 833491904 833792576 834151552 834582080 835075520 835606080 836144000 836664832 837155072 837612736 838038464 838432000 838790720 839112384 839398912 839658432…
785316096 785505664 785665600 785798016 785896256 785952704 785969600 785956928 785928704 785891520 785838976 785752704 785615744 785424896 785204096 785010560 784920448 785015808 785342272 785878784 786540864 787224256 787859968 788429120 788959168 789495232 790078720 790730432 791444416 792194880 792949504 793681152 794375744 795030848 795648192 796228608 796769856 797269440 797728832 798155392…
791341888 791492032 791686080 791893952 792076096 792199104 792248320 792229632 792163072 792065344 791943296 791788800 791591360 791349888 791088576 790860736 790737856 790794432 791066816 791528256 792093440 792665664 793187008 793653312 794102528 794586048 795145600 795794752 796514880 797265024 797998656 798682816 799304256 799868544 800388992 800874880 801328512 801746752 802129600 802482752…
841985152 842157760 842308288 842425088 842493376 842501888 842450944 842355904 842236544 842113024 841995712 841883776 841772288 841663232 841572160 841533952 841595392 841799168 842157696 842633344 843146432 843622080 844026368 844375552 844714752 845092288 845543296 846077888 846680960 847317632 847950336 848551744 849107264 849618560 850089792 850523072 850915776 851263552 851566912 851834240…
851094272 851203392 851309504 851414080 851511680 851593920 851656128 851696704 851714048 851702528 851654784 851563520 851429696 851267008 851106112 850995840 850989376 851133760 851438976 851862720 852321984 852738112 853080832 853365568 853637952 853946560 854325440 854784320 855308864 855864768 856414784 856930496 857397248 857816000 858194688 858540480 858858240 859150784 859421248 859676992…
826235584 826314368 826373312 826403584 826395520 826341696 826239872 826095424 825916736 825711488 825484864 825242176 824993984 824762048 824584576 824512576 824596352 824867392 825304192 825829952 826333184 826733696 827018880 827236096 827457984 827749952 828154624 828678592 829298240 829966080 830632384 831260736 831833984 832352064 832822976 833251584 833638464 833981376 834282688 834549696…
835751808 835911424 836082304 836239808 836351808 836391616 836346368 836220608 836033344 835807424 835560448 835304128 835048320 834808128 834614016 834512768 834557312 834789376 835203328 835733824 836271424 836722304 837055488 837299328 837514432 837761920 838085184 838496768 838980992 839501312 840019456 840507136 840952768 841359424 841735488 842084672 842406848 842699072 842962496 843204352…
813192448 813342464 813505408 813685312 813869568 814038528 814174784 814268928 814314816 814306496 814236928 814098752 813894784 813640640 813375872 813163072 813076352 813188032 813528896 814062336 814691008 815310848 815865024 816354880 816820096 817305664 817843392 818438336 819071168 819707840 820317376 820884096 821410048 821909120 822393024 822865536 823318848 823740992 824123200 824464640…
774078528 774217088 774344704 774445824 774491072 774456384 774330880 774121536 773849472 773537536 773202432 772851968 772495040 772148352 771849344 771661440 771656768 771897600 772393216 773075200 773817216 774503872 775089216 775600832 776106944 776675264 777349696 778134912 778997568 779878144 780720192 781485504 782164160 782766976 783312512 783814528 784277632 784702016 785091776 785457472…
8.26958e-09 8.28445e-09 8.29911e-09 8.31142e-09 8.31945e-09 8.32212e-09 8.3197e-09 8.31365e-09 8.30609e-09 8.29885e-09 8.29268e-09 8.28729e-09 8.28176e-09 8.27543e-09 8.26859e-09 8.26293e-09 8.26114e-09 8.26641e-09 8.28074e-09 8.30356e-09 8.33177e-09 8.36136e-09 8.38965e-09 8.41604e-09 8.44174e-09 8.46858e-09 8.49809e-09 8.53076e-09 8.56591e-09 8.60205e-09 8.63761e-09 8.67159e-09 8.70391e-09 8.73…
1.4468e-09 1.44616e-09 1.4458e-09 1.44563e-09 1.44544e-09 1.44498e-09 1.44416e-09 1.44304e-09 1.44181e-09 1.44062e-09 1.43948e-09 1.43826e-09 1.4367e-09 1.43466e-09 1.43216e-09 1.42951e-09 1.42727e-09 1.42616e-09 1.42679e-09 1.42927e-09 1.43316e-09 1.43768e-09 1.44217e-09 1.44633e-09 1.4502e-09 1.45405e-09 1.45818e-09 1.46273e-09 1.46772e-09 1.473e-09 1.47838e-09 1.4837e-09 1.48888e-09 1.49391e-0…
1.10202e-08 1.10177e-08 1.1019e-08 1.10243e-08 1.10319e-08 1.10389e-08 1.10424e-08 1.10408e-08 1.10337e-08 1.10219e-08 1.10066e-08 1.09893e-08 1.0971e-08 1.09534e-08 1.09386e-08 1.09302e-08 1.0932e-08 1.09476e-08 1.09774e-08 1.10177e-08 1.1061e-08 1.10997e-08 1.11303e-08 1.11531e-08 1.11716e-08 1.11905e-08 1.12136e-08 1.12432e-08 1.12795e-08 1.13208e-08 1.13649e-08 1.14092e-08 1.14524e-08 1.14935…
834599552 834835712 835098240 835358656 835579584 835728896 835788032 835758848 835657984 835507200 835324032 835117120 834892416 834660800 834449024 834303616 834279616 834430400 834770368 835260416 835814720 836344960 836801408 837181760 837519360 837857600 838232512 838658624 839128640 839619200 840104704 840567872 841004096 841418752 841819328 842207744 842579648 842927808 843247168 843538944…
774021504 774222208 774410624 774583296 774724480 774819712 774863808 774865472 774840576 774799872 774740416 774648000 774506304 774315904 774103872 773932480 773885440 774049920 774469376 775112256 775877632 776646720 777344128 777956160 778520448 779093760 779728064 780447360 781245248 782087680 782932992 783744192 784499968 785195328 785833216 786417216 786948864 787430016 787867072 788271552…
843447296 843428928 843408384 843385856 843351360 843296448 843215808 843113856 842998720 842877056 842748032 842603520 842437056 842249280 842058496 841901376 841825024 841874368 842067968 842379456 842748288 843109760 843429632 843710528 843982528 844280320 844631744 845044864 845507904 845994176 846477376 846938176 847369216 847772736 848151424 848503936 848824832 849107392 849351360 849564672…
865993792 865993408 865970752 865932288 865878400 865806592 865718784 865622656 865528256 865441600 865359360 865269632 865159296 865023488 864872576 864735616 864654464 864673664 864817280 865068032 865372864 865672832 865936192 866164800 866387456 866637376 866940032 867303168 867714624 868148736 868577984 868982016 869353536 869693888 870008448 870298624 870562368 870796096 871000064 871178752…
828636224 828802816 828976576 829141440 829274112 829353408 829370048 829332288 829257792 829163392 829055616 828928448 828770816 828578496 828364864 828167296 828041600 828051008 828233664 828576896 829015104 829466112 829877440 830239104 830574976 830921472 831308544 831746432 832227264 832727040 833222656 833697728 834150720 834586176 835009920 835421504 835812160 836172608 836498112 836791808…
797797952 797783808 797791168 797821568 797850880 797848064 797784448 797649280 797448896 797200448 796922304 796628160 796332608 796053376 795824896 795700224 795737664 795983552 796431360 797009536 797596672 798090944 798457664 798730496 798983872 799293760 799717312 800273984 800945152 801682176 802427904 803134528 803775104 804344320 804848256 805293376 805683584 806020416 806310336 806566016…
830623488 830532864 830454720 830369792 830258688 830109888 829926976 829725184 829521728 829325952 829133248 828927680 828694592 828431552 828156352 827912512 827753664 827732608 827871488 828143936 828482880 828820928 829124864 829400768 829683200 830009792 830404416 830865536 831367936 831869568 832333056 832735168 833073472 833361408 833617344 833855872 834084800 834307200 834526912 834751296…
872611776 872521280 872486976 872497728 872525952 872543168 872528256 872478656 872403968 872321792 872241664 872162176 872072960 871959936 871817408 871653568 871492736 871371136 871323008 871361920 871472320 871622592 871783360 871943744 872112320 872307456 872549952 872852544 873214720 873623168 874057152 874492864 874908800 875289856 875624064 875904768 876129216 876303104 876440704 876561216…
824783168 824701440 824672896 824707840 824789376 824886144 824964224 825001152 824985280 824911488 824776896 824577728 824313600 823995968 823656768 823353792 823160960 823158592 823388928 823828864 824389440 824960192 825465408 825882112 826236032 826571776 826935744 827356480 827840192 828372224 828927872 829481536 830013056 830510400 830965568 831372224 831726208 832028672 832290112 832526784…
819700608 819899904 820071552 820202560 820276544 820282880 820223680 820115648 819981056 819840000 819699264 819553216 819392448 819216896 819044032 818917952 818896896 819040064 819371584 819854656 820397248 820903680 821324480 821666240 821977472 822315072 822727104 823235072 823831488 824483200 825149760 825794240 826393536 826940992 827437440 827885056 828285376 828639936 828954624 829240512…
757741696 757676928 757598784 757502528 757374976 757204224 756986624 756731264 756455488 756175744 755901248 755634624 755378752 755145856 754967168 754893568 754980288 755267264 755738880 756318336 756888448 757360384 757718912 758016576 758338240 758761472 759339520 760082624 760961280 761916800 762886208 763821248 764697280 765510720 766265472 766961344 767590272 768142976 768617408 769022656…
824794816 824886528 824997248 825107968 825193920 825236864 825225984 825161664 825045696 824880704 824666624 824405376 824108416 823798976 823518400 823323520 823271488 823406400 823728192 824183744 824681024 825144064 825545728 825904000 826260544 826651904 827097792 827596032 828129472 828674496 829213440 829738624 830247808 830739008 831203584 831626944 831998144 832316992 832598016 832864320…
802186816 802362688 802550912 802737344 802899072 803019008 803094080 803132416 803148224 803144448 803110720 803026112 802873216 802651008 802387648 802146432 802012160 802080064 802406464 802970176 803671360 804385536 805031744 805595008 806110976 806633088 807208640 807857920 808573120 809322688 810069120 810779648 811438272 812041984 812593856 813096256 813548352 813950528 814309696 814638720…
828257984 828628672 828954560 829143360 829144128 828955840 828628672 828242816 827880256 827599488 827413184 827297088 827206848 827108864 826993152 826885248 826837824 826916672 827162176 827558976 828035520 828503104 828908608 829249216 829560768 829890688 830278656 830740352 831264896 831820672 832370368 832886400 833359808 833797632 834215872 834628288 835039168 835442880 835827392 836180160…
916506944 916495424 916486656 916483904 916482688 916474816 916454336 916417984 916365056 916295296 916207168 916099520 915974592 915841728 915720512 915641344 915635776 915729728 915920896 916171776 916420160 916614208 916737216 916806400 916858752 916930688 917049920 917226176 917452480 917708992 917972864 918226624 918460480 918673792 918866240 919036352 919179200 919287872 919360896 919403840…
823990400 824003840 823999488 823966208 823892416 823772800 823611584 823419968 823212608 823002560 822796352 822596032 822406592 822238784 822116160 822073280 822141696 822339328 822649984 823023744 823395328 823718976 823989504 824238272 824513728 824857024 825293184 825819456 826410688 827027072 827632192 828202432 828731456 829225088 829690560 830130944 830543808 830924224 831272064 831594304…
842039424 842021248 842021248 842029056 842026432 841996096 841927488 841820736 841683520 841527680 841362368 841192704 841024768 840866240 840736256 840662144 840673088 840789952 841009216 841298240 841606016 841892672 842147200 842387520 842648576 842960960 843343872 843795904 844296064 844811648 845313472 845783936 846220544 846632000 847029120 847418240 847797248 848158464 848494784 848801408…
801735936 801622528 801507136 801403456 801308032 801206976 801087040 800942976 800777600 800597824 800410176 800216896 800022208 799835904 799682112 799599232 799630720 799811904 800143488 800583872 801059904 801506240 801897344 802248384 802602304 803004160 803486400 804055872 804695488 805369920 806042624 806689024 807297600 807871168 808415360 808932352 809418112 809868032 810281600 810664896…
857721920 857891456 857971520 857957184 857848768 857657792 857410880 857143040 856889600 856676480 856509568 856377280 856262144 856152896 856056384 856001152 856027072 856176192 856460928 856846144 857256768 857620928 857906432 858128512 858331840 858567360 858876544 859278592 859766144 860311040 860876928 861428864 861941696 862404928 862811840 863159360 863444928 863668672 863838336 863969984…
771763392 772088640 772386944 772625344 772778624 772837888 772812672 772725120 772598016 772447104 772271168 772063552 771823808 771570176 771350848 771244224 771335424 771689216 772299584 773065536 773821888 774430528 774848640 775128320 775376896 775706624 776207424 776921856 777837632 778893312 780001984 781074496 782037952 782853120 783507264 784008768 784383488 784671040 784922624 785188800…
771115584 771255360 771363968 771428672 771432192 771361216 771218560 771023104 770801728 770579584 770366208 770159744 769955392 769760064 769603648 769543360 769646912 769972032 770518272 771209536 771911680 772507904 772956672 773295104 773603904 773966464 774446848 775067648 775813120 776635904 777480576 778301056 779072768 779790656 780458624 781077824 781644608 782152704 782601152 782997888…
796702144 796822272 796928704 797004032 797020160 796953024 796795072 796561280 796284480 795999680 795728832 795476736 795236480 795002944 794786560 794621184 794555520 794643392 794908608 795322368 795809536 796292160 796730752 797135168 797546624 798012032 798563840 799207808 799922048 800667392 801406400 802116096 802792256 803442688 804074880 804685568 805260416 805781696 806237568 806629760…
848648000 848672576 848706304 848737856 848749632 848725440 848655552 848541312 848390528 848209408 847999808 847760320 847490432 847198272 846908736 846666048 846523648 846535104 846721792 847056640 847467968 847881152 848257152 848600000 848943424 849325248 849770048 850278144 850825600 851373760 851885376 852339328 852733760 853081408 853400256 853701696 853988096 854256128 854502080 854726592…
844921408 845079552 845246336 845404800 845529664 845602048 845614976 845578304 845512320 845436928 845357888 845270400 845161408 845024512 844869824 844732352 844663488 844723968 844950656 845330304 845797376 846271232 846698624 847070016 847411264 847759040 848145856 848585920 849071936 849581632 850090048 850579520 851045376 851492160 851925248 852345024 852744832 853113472 853444672 853739840…
829131136 829206144 829269760 829303616 829289920 829216064 829082112 828899200 828686144 828459456 828228352 827997120 827770688 827561920 827400064 827328256 827391360 827616256 827984000 828425728 828845440 829171136 829390400 829544448 829699584 829918592 830245376 830689408 831230528 831824320 832424320 832994048 833515840 833988736 834419776 834813056 835169088 835484864 835761088 836003584…
848913472 848975360 849027712 849059392 849054464 849001216 848898560 848756160 848589760 848414976 848238592 848060928 847884224 847716416 847582336 847522304 847577664 847779456 848116928 848532096 848937920 849264576 849492672 849651392 849797184 849984768 850255808 850623936 851076288 851580800 852100800 852607040 853083392 853526144 853934848 854307648 854639488 854925056 855166080 855372096…
833559488 833717952 833883648 834049280 834194944 834300480 834355648 834363264 834336576 834289152 834222976 834129536 833994880 833810944 833588608 833364864 833195584 833149696 833277056 833576064 833992896 834449856 834891584 835301696 835702080 836127488 836610176 837162368 837772288 838407040 839028352 839605184 840123584 840585984 841004544 841392640 841759168 842108672 842444608 842770368…
881653952 881600704 881540288 881470976 881386496 881278656 881139456 880965504 880759808 880526208 880270080 879998400 879719744 879449216 879213184 879047040 878988352 879065856 879276608 879581312 879914048 880216192 880461760 880660800 880845248 881050752 881304064 881614464 881974016 882363456 882761536 883154816 883538240 883914560 884285632 884649664 884999040 885325312 885623872 885895488…
809283648 809329728 809333952 809299776 809228544 809121792 808992256 808858048 808739328 808641344 808551104 808438976 808273792 808041856 807758464 807476800 807277632 807255040 807471936 807924672 808539968 809215616 809875264 810492608 811087808 811698240 812357120 813073152 813828608 814582528 815294720 815938240 816508864 817021120 817497664 817956992 818406848 818846144 819269760 819675008…
816358720 817026432 817607872 818041088 818273024 818270976 818031488 817588416 817004544 816357376 815711296 815110976 814582656 814142080 813816768 813653568 813711424 814041280 814642624 815439616 816295040 817072576 817696448 818160064 818510528 818812416 819126656 819489984 819914048 820391232 820906048 821448000 822013504 822604992 823221568 823851008 824472000 825056448 825580992 826032960…
849971008 849950720 849920512 849870144 849785920 849656000 849475648 849252224 848998016 848729856 848460096 848199680 847960192 847756480 847613696 847565632 847641728 847854080 848171456 848524352 848823680 849016064 849105856 849142272 849192192 849308288 849524544 849844160 850245376 850689024 851136448 851562048 851954176 852315456 852651520 852963712 853248320 853499648 853717056 853906048…
821568192 821790208 822030656 822270656 822480704 822635712 822724288 822750784 822725376 822653184 822526784 822329280 822045568 821678336 821259456 820860672 820578752 820527552 820782912 821333632 822070400 822843328 823542144 824125440 824616384 825065088 825521728 826016384 826553216 827114688 827675264 828212800 828716416 829187520 829630528 830047104 830436480 830795584 831124864 831432128…
840756672 840774016 840775232 840760640 840721792 840653888 840557760 840442944 840319680 840194560 840063808 839916928 839746688 839556416 839370560 839233984 839201536 839324032 839614720 840029312 840478720 840879744 841198208 841453248 841697216 841984704 842355584 842820352 843361728 843939584 844510272 845040576 845515840 845937792 846316928 846661312 846972736 847250624 847495680 847714944…
806132480 806455296 806776256 807082368 807350720 807560320 807701952 807780480 807805632 807783104 807707840 807564160 807339840 807037376 806688768 806363328 806153088 806163648 806461952 807030848 807766720 808534784 809239040 809849472 810394752 810928064 811499072 812133760 812827840 813549632 814260608 814927360 815533312 816080192 816579456 817043072 817479040 817890560 818281344 818655040…
837639552 837670272 837693312 837710272 837714624 837695168 837645568 837563392 837451840 837311872 837141824 836938304 836702784 836445760 836195904 835998400 835905152 835962432 836182272 836526592 836918016 837283392 837591040 837854528 838116608 838420992 838799744 839259712 839784640 840339200 840888384 841405312 841878272 842307008 842695616 843046848 843360000 843635008 843877824 844099136…
786856256 787126912 787328512 787436352 787419520 787257856 786960448 786569344 786147072 785752192 785413376 785123072 784848192 784556800 784236544 783912192 783642048 783503616 783552384 783785728 784133120 784502400 784834304 785123968 785412736 785756672 786203520 786769088 787437568 788165120 788904320 789622400 790308864 790972544 791626688 792274368 792905216 793499904 794042304 794528448…
842707456 842985536 843217856 843394176 843513536 843583168 843615936 843624256 843616000 843590592 843541120 843460992 843353088 843233280 843136512 843114368 843222656 843505728 843966720 844554624 845174720 845742208 846218560 846615936 846977088 847348992 847766464 848242432 848767040 849314112 849855488 850370048 850849088 851295552 851715648 852112896 852485824 852828608 853135936 853407424…
840921024 840915648 840847168 840707840 840501184 840241984 839950784 839648448 839352640 839074112 838816192 838580992 838377408 838222400 838147520 838191424 838385536 838737728 839204544 839701696 840130368 840434368 840619520 840741120 840870272 841064576 841358848 841756992 842236992 842760000 843287360 843792448 844264512 844705344 845120064 845508928 845867840 846189184 846469696 846712320…
747158272 747418368 747642112 747836224 748005056 748154624 748297856 748447872 748608064 748764352 748887232 748940416 748901184 748774720 748604288 748474496 748491968 748765568 749349120 750202496 751194688 752177280 753062208 753841024 754568128 755314816 756142784 757078016 758110400 759197696 760288896 761342016 762332096 763255360 764114752 764909568 765635072 766281792 766846848 767335744…
850099136 845981952 841299456 836740096 833025536 830763776 830324096 831689472 834460928 837921536 841297792 843914688 845360640 845536320 844573312 842787328 840591808 838522048 837127488 836808640 837711424 839678272 842386112 845467136 848578176 851391360 853526144 854618176 854396032 852795392 850067520 846771392 843679296 841500480 840738752 841532672 843632000 846467584 849317952 851565376…
831403328 831546496 831666560 831753664 831797696 831795328 831753856 831688896 831616768 831545856 831471808 831384256 831274240 831148480 831033856 830981568 831052352 831302208 831744768 832333248 832968768 833556288 834050496 834462784 834840192 835234688 835687808 836214592 836807168 837438784 838077696 838698048 839285504 839835200 840345152 840811456 841228544 841593088 841907968 842183360…
848752832 849720064 850971456 852358400 853722432 854915392 855811968 856334912 856457152 856201280 855630016 854830464 853896320 852909760 851957184 851135936 850550400 850311936 850486656 851047808 851861248 852747008 853565376 854250112 854803264 855259648 855655872 856013056 856334208 856612096 856843584 857041088 857238208 857476352 857792384 858202112 858690624 859216000 859720064 860150656…
831365760 831588032 831826304 832066240 832286592 832467264 832593920 832663808 832680576 832649408 832569984 832438784 832253696 832022144 831772224 831556864 831447232 831521536 831825728 832344448 832996736 833676608 834306432 834856960 835344512 835809024 836291072 836815808 837385920 837984640 838581056 839147328 839662912 840121856 840526208 840885952 841209664 841507328 841789632 842063616…
848988480 849244736 849499648 849738368 849942464 850100544 850209984 850278144 850317504 850334464 850324992 850278336 850182272 850036864 849862144 849705344 849629568 849706880 849980864 850437312 851003648 851585600 852114944 852569856 852968064 853347392 853745856 854186432 854673152 855193024 855724096 856245824 856744384 857215168 857656768 858068928 858447744 858789120 859091392 859357056…
841749696 841946880 842062976 842090048 842026624 841882240 841676608 841436480 841191232 840965760 840773312 840620800 840512704 840459648 840484032 840619456 840894912 841316864 841845184 842394880 842864832 843189632 843366592 843445440 843498240 843591360 843773696 844066688 844463488 844937408 845456512 845991744 846526208 847052608 847566976 848061248 848523008 848935744 849285824 849568000…
812704256 812812608 812910144 812993600 813050624 813070208 813051328 813001664 812933952 812854848 812759488 812633152 812463360 812250432 812018112 811819456 811724864 811807488 812106112 812589184 813163200 813724416 814214464 814634688 815030336 815454848 815948800 816525440 817167488 817835840 818490688 819103616 819667264 820190720 820686784 821161408 821612288 822029248 822406848 822746560…
828033280 828097472 828167680 828230592 828264512 828252032 828188096 828084288 827958592 827827072 827692480 827546624 827378112 827185088 826988096 826834432 826787776 826916672 827251712 827759872 828345408 828904896 829378112 829764992 830106880 830455936 830855424 831323648 831853056 832416256 832981824 833526208 834041216 834529472 834998400 835449728 835878848 836277184 836638848 836964352…
830737088 830822656 830908032 830978560 831015040 831004928 830948992 830860032 830755904 830647104 830530112 830392448 830222720 830022784 829820096 829666496 829627904 829767360 830103296 830587840 831118464 831595584 831974336 832273792 832551424 832868224 833271168 833775040 834362688 834994368 835624320 836218176 836759744 837249920 837695232 838100864 838465792 838786560 839064704 839308480…
1.20257e-08 1.20344e-08 1.20445e-08 1.2054e-08 1.20609e-08 1.20643e-08 1.20645e-08 1.2063e-08 1.20616e-08 1.20611e-08 1.20607e-08 1.20584e-08 1.20518e-08 1.20397e-08 1.20228e-08 1.20042e-08 1.19893e-08 1.19845e-08 1.19951e-08 1.20218e-08 1.20607e-08 1.21048e-08 1.21488e-08 1.219e-08 1.22292e-08 1.22688e-08 1.2311e-08 1.23567e-08 1.24056e-08 1.24558e-08 1.25051e-08 1.25521e-08 1.25964e-08 1.26386e…
1.09277e-08 1.09301e-08 1.09314e-08 1.09305e-08 1.09262e-08 1.0918e-08 1.09058e-08 1.08906e-08 1.08738e-08 1.08566e-08 1.08394e-08 1.08221e-08 1.08044e-08 1.07867e-08 1.07706e-08 1.07589e-08 1.07547e-08 1.0761e-08 1.07779e-08 1.08025e-08 1.08292e-08 1.08532e-08 1.08728e-08 1.08897e-08 1.09074e-08 1.09296e-08 1.09586e-08 1.09946e-08 1.10359e-08 1.10796e-08 1.11224e-08 1.11624e-08 1.11989e-08 1.123…
1.13227e-08 1.13224e-08 1.13226e-08 1.1323e-08 1.13229e-08 1.13209e-08 1.13161e-08 1.13086e-08 1.1299e-08 1.12885e-08 1.12778e-08 1.12668e-08 1.12557e-08 1.12447e-08 1.12352e-08 1.12297e-08 1.12314e-08 1.12433e-08 1.12663e-08 1.12981e-08 1.13334e-08 1.13674e-08 1.13979e-08 1.14259e-08 1.14548e-08 1.14877e-08 1.1527e-08 1.15728e-08 1.16236e-08 1.16761e-08 1.17271e-08 1.17744e-08 1.18171e-08 1.1855…
800219968 800347904 800479296 800617088 800750656 800865792 800963456 801058880 801173248 801315520 801470080 801600128 801659456 801618816 801478400 801282304 801112960 801080832 801279552 801732032 802374016 803090816 803784704 804410752 804981056 805536832 806123584 806767744 807471040 808210048 808951232 809664832 810333696 810956544 811538560 812084608 812596288 813072000 813514112 813929856…
818639936 818773440 818914240 819038400 819111616 819104128 819006592 818834432 818620992 818400192 818191680 817995520 817799296 817595392 817395200 817239296 817191552 817323776 817675200 818218304 818860224 819489728 820040960 820505216 820920512 821341312 821813440 822356800 822962624 823598784 824228160 824821760 825368704 825874048 826348736 826800384 827228608 827628992 827998656 828340544…
801005888 800951360 800913088 800877760 800821056 800716480 800550528 800327104 800067008 799794176 799525312 799267328 799021888 798794944 798607424 798500288 798520768 798706560 799053184 799497088 799937536 800291904 800538816 800716096 800895168 801145728 801518656 802028992 802656768 803352576 804062784 804743168 805370816 805943296 806466880 806947328 807384640 807777024 808125888 808441408…
798121536 798351360 798568576 798752384 798876800 798922752 798885376 798778560 798628032 798458624 798284352 798106752 797921088 797728128 797546560 797415616 797387392 797512448 797808448 798244544 798748224 799244160 799692672 800098432 800497408 800933696 801441472 802030080 802684928 803373568 804061248 804724992 805356160 805958400 806536384 807088832 807605376 808072896 808483264 808838016…
861763904 861742144 861702592 861634816 861527808 861370368 861160192 860906048 860624448 860335872 860058304 859803776 859581440 859401344 859278080 859230144 859274432 859412032 859618432 859847616 860047424 860189376 860280448 860356544 860463744 860638912 860902016 861248640 861654528 862083648 862503616 862895616 863255168 863589184 863906176 864208064 864490560 864746240 864969728 865163584…
825617536 825744832 825849152 825919424 825940096 825899200 825794880 825638976 825451520 825251840 825049984 824847808 824645056 824447104 824275520 824168960 824171456 824318464 824608000 824994176 825399680 825759488 826051200 826297920 826549504 826856320 827253504 827746432 828311616 828906112 829486208 830022336 830503616 830937344 831336512 831711104 832063808 832392576 832695552 832975360…
860012544 860008832 860003584 859988224 859944896 859858368 859715392 859515776 859269696 858995456 858713536 858445184 858211008 858031872 857934720 857948992 858094208 858367680 858723072 859080064 859351296 859494784 859528064 859513088 859520960 859608640 859808512 860122816 860527936 860983296 861449344 861897408 862315776 862705600 863071808 863414400 863727936 864004288 864240768 864442304…
794672256 794694016 794708160 794707328 794677056 794602560 794476288 794301824 794087424 793844736 793582912 793307776 793031296 792776256 792580864 792500992 792592832 792890368 793371328 793950016 794502080 794938560 795247040 795481920 795727488 796058432 796521856 797122176 797827520 798578176 799316032 800000832 800619136 801181248 801704896 802201216 802670464 803104832 803497344 803846976…
835138752 835109568 835091648 835084928 835075904 835051968 835005184 834935296 834848128 834745792 834624512 834475968 834296128 834093312 833896192 833755328 833728320 833866880 834179584 834614336 835073344 835467200 835761728 835980928 836182656 836426688 836757760 837188800 837703296 838262528 838822912 839352064 839836480 840278784 840687936 841070464 841424896 841744704 842026432 842270976…
831052224 831232192 831411456 831595136 831771712 831925504 832045440 832134272 832200704 832250240 832278976 832271040 832207360 832081216 831904768 831721344 831595712 831607232 831812032 832210624 832741184 833314752 833861312 834353536 834802688 835240832 835699136 836196224 836733568 837297600 837871232 838440832 838999552 839545536 840075776 840582144 841052672 841478272 841856384 842194368…
818769856 818796608 818840896 818891136 818925184 818923776 818882112 818810496 818727744 818645504 818557888 818445440 818282560 818058368 817787392 817518848 817326208 817295360 817480896 817872000 818389568 818930560 819424128 819851520 820241344 820639488 821089536 821610688 822196224 822815872 823432320 824015552 824549696 825034880 825476672 825880256 826245888 826572160 826861632 827122944…
803944960 804094720 804208896 804265984 804246656 804143040 803964928 803738112 803495872 803265280 803058176 802871872 802700288 802544256 802424576 802381376 802462336 802704832 803105536 803611392 804135808 804606144 804996864 805332352 805665344 806050048 806524352 807095488 807743744 808428032 809107008 809750976 810348416 810900800 811414336 811892544 812332736 812731264 813089600 813415680…
795098624 795469120 795761216 795996096 796191488 796358720 796505664 796634368 796738048 796800704 796800512 796717376 796546112 796305600 796046528 795854208 795827584 796064576 796605696 797401280 798317888 799209536 799988544 800643072 801220096 801783808 802389120 803060352 803788992 804539968 805271808 805953856 806574464 807141824 807672320 808181312 808675072 809152960 809610688 810045312…
796661440 796787584 796928576 797050112 797121408 797123712 797056512 796934464 796778112 796604160 796417664 796218112 796008384 795803584 795641280 795580288 795683392 795997760 796515264 797162560 797820864 798393408 798847360 799215616 799563904 799958144 800442560 801027904 801693376 802396864 803096000 803762816 804387904 804977280 805537472 806069504 806564032 807008256 807395776 807731456…
836286912 836486592 836711168 836948864 837176256 837369600 837515328 837611968 837669504 837699904 837709440 837698240 837663104 837607936 837550208 837527104 837588416 837786176 838146432 838646336 839219712 839790208 840313920 840788672 841244096 841718656 842244160 842832128 843472576 844138688 844799424 845430208 846018432 846561280 847058880 847509248 847907136 848247552 848532416 848771648…
867485760 867614528 867735040 867828032 867880000 867888000 867856320 867798016 867728128 867657728 867588672 867517824 867439104 867349824 867261440 867197568 867189952 867275072 867470336 867760704 868102656 868445632 868763200 869058240 869354624 869679424 870054912 870485760 870960384 871454080 871941696 872405184 872839232 873249216 873643904 874029952 874406208 874766336 875103744 875412352…
912074112 912158656 912185792 912161472 912098304 912016832 911938432 911879488 911843904 911823424 911799552 911753088 911674048 911566464 911453376 911374208 911370176 911477376 911701952 912008960 912332928 912616576 912837312 913009856 913170176 913354368 913589120 913883008 914225280 914592832 914959232 915303552 915614976 915892544 916139776 916360640 916558400 916736192 916899392 917055040…
825071936 825266816 825470528 825676224 825868096 826027072 826135488 826182400 826162880 826076032 825925952 825721024 825478464 825227072 825011264 824894848 824944384 825215296 825712064 826369024 827064448 827684544 828177728 828558592 828885504 829225664 829634624 830138944 830735040 831393600 832074048 832740608 833370304 833955904 834499904 835005440 835472256 835897600 836280512 836624448…
809497472 809469696 809421632 809351296 809257152 809144576 809024576 808914048 808825536 808763520 808720256 808682304 808641280 808602880 808594112 808660800 808850048 809192576 809671552 810216896 810729728 811140224 811439680 811679168 811933184 812270400 812737216 813342528 814060032 814836736 815615552 816351104 817019776 817619840 818157760 818640512 819068992 819441664 819760064 820033472…
831050816 831266048 831454592 831597952 831685632 831721472 831724288 831723776 831751040 831823360 831938880 832075584 832203392 832299072 832356800 832395712 832455552 832591296 832846912 833228160 833698816 834199296 834684288 835139072 835578944 836031616 836525184 837073728 837674112 838309568 838956864 839597952 840224384 840835968 841434944 842019904 842582016 843108608 843587328 844011904…
817056320 817264000 817457280 817637696 817802496 817946496 818066944 818163904 818234944 818273536 818268352 818206720 818084544 817914496 817733760 817606912 817613696 817834304 818306496 818994368 819790784 820574976 821270656 821864704 822392192 822905600 823453312 824061440 824731456 825443968 826171520 826888832 827578304 828231680 828842688 829402560 829901632 830331776 830695424 831003328…
858202496 858331520 858468032 858590144 858675200 858705920 858675904 858593728 858476928 858345728 858215488 858094272 857984512 857890496 857822464 857801792 857853824 858000192 858242880 858556608 858895168 859216448 859502720 859763712 860027392 860327168 860689408 861124736 861626048 862169024 862723840 863261824 863763136 864219712 864633088 865008896 865354752 865678656 865987776 866286336…
855918208 856028224 856144000 856240512 856294464 856292032 856232960 856127232 855991232 855837952 855673152 855498048 855316032 855139008 854993792 854921088 854964416 855155328 855488512 855914432 856356288 856747584 857063872 857323456 857570944 857855552 858214336 858661056 859184128 859750592 860322112 860865280 861360704 861804032 862201024 862559936 862886592 863184832 863457664 863707520…
811385408 811316736 811204608 811061888 810903040 810741952 810591424 810459072 810345536 810245952 810151488 810052864 809949248 809851968 809785984 809788224 809894720 810127424 810473024 810884096 811292480 811649088 811945408 812211968 812500096 812859712 813327104 813911808 814597312 815344704 816109312 816852736 817550272 818192128 818777920 819309568 819787456 820212544 820587328 820917440…
818431104 818572672 818702464 818815872 818903296 818958528 818981888 818981504 818965248 818936320 818887232 818807936 818692480 818550080 818413184 818338304 818392640 818637184 819088832 819697728 820359104 820970816 821484864 821915264 822315840 822745920 823251136 823844480 824508672 825200512 825873280 826491712 827042240 827531520 827975168 828387328 828774400 829135040 829467072 829771392…
859602688 859519872 859538560 859607040 859668736 859679616 859620160 859504000 859364160 859235840 859140096 859078272 859037312 859009152 859003456 859059072 859239040 859612288 860208192 860982144 861813824 862563008 863140032 863526464 863766528 863936320 864123136 864398272 864804096 865344512 865983936 866659264 867294848 867830144 868227968 868482752 868614784 868664832 868678080 868685376…
818571840 817711488 817040192 816800128 817115648 817953024 819117056 820317440 821251456 821702592 821623296 821123072 820415424 819718464 819209984 818975040 818986112 819099904 819098496 818797504 818136576 817234944 816318528 815643392 815410560 815740992 816682944 818192768 820142080 822324352 824518336 826533248 828249984 829641728 830747200 831633280 832353920 832936256 833379520 833676096…
821449984 821785024 822052160 822243200 822359104 822412480 822431616 822450944 822500352 822591040 822711040 822827904 822907392 822928832 822897728 822853440 822859392 822995904 823319104 823829184 824460672 825120064 825739968 826299264 826819904 827341824 827902592 828520832 829190272 829881664 830556032 831179264 831729920 832205120 832614528 832974400 833301248 833610368 833914368 834223424…
813607104 814521856 815456064 816519168 817784640 819286336 821019136 822941760 824981568 827047872 829062592 830977920 832792000 834546688 836299520 838093120 839912960 841648000 843096448 844051904 844412096 844252544 843773568 843209472 842736384 842448320 842373824 842485760 842727808 843034560 843353408 843651456 843909440 844108608 844217472 844186432 843966400 843521600 842851968 841997248…
804233984 804456128 804696896 804933824 805140224 805294464 805389696 805436416 805451200 805447744 805430016 805391168 805323648 805232000 805142336 805104192 805183872 805443648 805906688 806530752 807217344 807866112 808428096 808914688 809378368 809878016 810461184 811142720 811908672 812717824 813522368 814283584 814981312 815612544 816186496 816710592 817188864 817623296 818017792 818380416…
827395456 827424000 827437760 827431552 827390592 827299584 827151040 826953984 826728768 826501824 826293056 826110848 825958656 825840320 825770368 825781248 825912448 826197504 826637120 827181824 827746688 828254976 828675392 829024384 829352192 829711936 830145856 830670336 831273664 831922176 832576704 833205632 833792960 834338048 834847616 835326784 835774720 836185984 836556224 836885248…
823906624 824171392 824418048 824602496 824699392 824712064 824671488 824618176 824579904 824559296 824534784 824474944 824360128 824195456 824019072 823897408 823905152 824109696 824534464 825139392 825833920 826524992 827158528 827727808 828258112 828781440 829325312 829901376 830509568 831141056 831783616 832426624 833057792 833663040 834227584 834737344 835185472 835576384 835926464 836255296…
836322944 836492992 836661376 836812416 836931712 837011648 837056128 837078400 837093440 837107392 837113984 837096384 837038336 836935488 836802688 836679936 836622592 836692416 836926848 837316672 837803776 838316544 838806592 839264064 839710080 840177216 840692800 841266496 841888640 842534336 843174336 843785600 844356672 844885696 845373632 845820608 846224000 846581440 846895168 847173696…
809421312 809545984 809679488 809793856 809857088 809844608 809745280 809569792 809342528 809092032 808841152 808603776 808388160 808206336 808082752 808054720 808162368 808432320 808850112 809358016 809869888 810317632 810679680 810982976 811281984 811631040 812070016 812608768 813229760 813895168 814565760 815214144 815830464 816418368 816985856 817535168 818059904 818548672 818991040 819384000…
854779520 854824128 854863936 854884160 854868800 854805888 854692864 854534528 854342912 854133824 853917952 853704960 853503360 853324352 853186624 853116608 853139264 853270208 853500928 853794112 854099712 854379264 854622592 854850176 855096000 855392512 855760192 856198912 856690496 857203520 857708288 858183232 858618944 859018496 859387904 859731264 860049792 860342848 860611264 860858240…
826102272 826176192 826208704 826195584 826133440 826024000 825877376 825708544 825533952 825364160 825199296 825034560 824866880 824702592 824566336 824499072 824545344 824739712 825079424 825518784 825983552 826408832 826770624 827086848 827401408 827758784 828192448 828708800 829291840 829908544 830524288 831115008 831670592 832192448 832684864 833147712 833576000 833961856 834301760 834599552…
851310912 851463488 851616832 851756928 851866688 851933760 851955264 851936448 851888512 851821888 851742912 851653120 851555584 851458816 851384960 851370496 851456384 851678976 852046976 852528256 853059712 853579392 854054080 854485760 854902272 855337920 855819904 856358464 856942976 857546944 858139776 858695040 859197632 859645632 860044864 860405120 860733824 861037888 861323072 861593408…
844554496 844646016 844745024 844837888 844907968 844944000 844942464 844908288 844849600 844772416 844677568 844563008 844429120 844286336 844159936 844091776 844127872 844307648 844639616 845088576 845586688 846070464 846507520 846904512 847293184 847711552 848186944 848727296 849319168 849933632 850537856 851107072 851628288 852100160 852528064 852917376 853270976 853591488 853883392 854152064…
835420480 835512320 835612032 835703296 835768064 835796608 835788544 835753984 835706240 835652672 835590720 835509312 835398016 835258176 835110400 834998080 834978560 835111296 835426048 835903872 836477888 837068800 837624000 838129216 838603584 839078720 839583744 840131136 840715712 841316992 841911680 842480896 843016064 843516672 843986048 844424896 844831104 845201472 845536512 845840768…
835538688 835592256 835623168 835627264 835602176 835546880 835466944 835372480 835274176 835178176 835082368 834981696 834872000 834758272 834660928 834613504 834653568 834811200 835086336 835446144 835834560 836203584 836537984 836855872 837193216 837586048 838057088 838604352 839204864 839820416 840414144 840962688 841459264 841912256 842333888 842733696 843111424 843462592 843780736 844062016…
838671616 838900288 839136448 839375936 839601536 839798912 839958784 840083072 840178688 840250688 840294976 840301504 840261824 840179072 840077120 840006272 840028672 840209216 840581120 841121984 841760768 842412544 843020864 843570496 844082496 844591360 845127744 845704256 846312768 846928960 847526464 848085120 848598656 849070720 849508800 849917120 850295424 850639872 850949184 851227200…
834909504 835061824 835174464 835254912 835309632 835345920 835373888 835405760 835449344 835503168 835553792 835583104 835576320 835532352 835473920 835446656 835506752 835710848 836082368 836594368 837176896 837751360 838269632 838723968 839141248 839559936 840016256 840529152 841097088 841702144 842318016 842922624 843500928 844047680 844561280 845039872 845479744 845876288 846229696 846543552…
839046656 839283776 839480256 839631872 839741440 839819968 839883968 839948224 840017472 840080960 840116096 840095808 840005248 839850560 839665920 839511424 839460096 839583424 839911552 840410368 840986688 841543040 842027008 842442688 842833984 843252544 843740160 844310080 844948224 845617152 846275456 846892224 847453824 847963712 848433664 848872064 849278080 849645824 849967808 850241216…
833092352 833197312 833292992 833361728 833382464 833339584 833229312 833063296 832861760 832649088 832442048 832250304 832081216 831945728 831865920 831879040 832022144 832317632 832746112 833240000 833704000 834071360 834332224 834531392 834736512 835009856 835393664 835897600 836500032 837155904 837817152 838445312 839020096 839539008 840005632 840422592 840786304 841092544 841341568 841542592…
833486272 833616960 833731392 833820352 833871616 833880384 833855360 833816128 833782976 833765632 833756096 833731008 833665792 833549056 833393600 833242240 833160704 833225920 833489408 833943872 834517184 835113152 835664832 836152128 836599936 837047168 837530816 838069312 838657920 839273088 839885056 840468736 841011712 841513856 841981248 842419904 842832192 843216832 843573504 843904128…
831589184 831742272 831911232 832081536 832232192 832347520 832427008 832486400 832543552 832602688 832645120 832631616 832515328 832268224 831890560 831430848 830981504 830679424 830656064 830971072 831576896 832340544 833127296 833846912 834476416 835035328 835558912 836075776 836600576 837131328 837656384 838164928 838652864 839123968 839585024 840040064 840489600 840929728 841356800 841770112…
858071744 858126848 858162688 858153984 858080832 857933440 857712832 857434688 857120000 856791744 856468032 856163392 855891136 855668864 855525824 855497152 855613888 855885056 856268288 856679488 857015488 857216768 857291264 857298432 857314368 857401792 857600128 857913280 858319232 858773824 859234560 859671040 860071232 860438528 860781376 861103296 861399936 861664192 861890624 862081152…
850345536 850257728 850150592 850028736 849890112 849728704 849540992 849327552 849095872 848852544 848603840 848356800 848119104 847906496 847745152 847671360 847720576 847914432 848233472 848617024 848980416 849264576 849462720 849614336 849775552 849995904 850304896 850703104 851167936 851662144 852148992 852606784 853030464 853427264 853807040 854172288 854517120 854831232 855108480 855349824…
843824448 843855680 843845312 843789056 843683072 843532736 843352896 843164992 842993152 842849344 842732096 842627584 842521344 842410880 842313536 842269440 842329152 842538752 842906112 843382848 843880128 844315648 844655680 844919872 845159808 845427008 845761920 846176064 846655872 847169472 847682880 848172096 848628864 849058368 849468864 849863360 850237888 850583552 850895168 851174272…
833988288 834012544 834015808 833987520 833912064 833772352 833558592 833273408 832934720 832567232 832195136 831839808 831517056 831241856 831036096 830931264 830960896 831145856 831472192 831882560 832292160 832636160 832898880 833112512 833331456 833606976 833975040 834443520 834995264 835594624 836203840 836794816 837354048 837881088 838378368 838844096 839271424 839651584 839980928 840264256…
814148096 814192000 814206784 814192000 814140544 814045952 813908608 813737152 813546432 813350272 813155968 812964928 812779904 812610560 812482560 812437440 812521536 812768384 813171008 813670720 814174592 814609856 814958016 815253120 815555136 815918720 816379712 816940992 817578432 818247232 818903488 819516928 820076416 820586112 821054784 821486656 821880512 822232960 822546432 822829696…
829584704 828929280 828673728 828836608 829237824 829599104 829663232 829324032 828658240 827887168 827254336 826933760 826961344 827250880 827639488 827956224 828093440 828040448 827907392 827859520 828033280 828439936 828979776 829511552 829930112 830203328 830369536 830517184 830751168 831152960 831740672 832459776 833201728 833852160 834330752 834621248 834771968 834875648 835028672 835284928…
842122496 842219712 842293696 842346496 842374592 842370368 842334336 842274112 842201408 842124352 842039360 841936128 841801984 841635712 841455680 841305216 841243584 841334016 841608128 842035648 842532032 843001856 843391552 843702720 843977536 844268352 844619840 845050112 845549568 846084224 846614464 847108672 847553664 847954496 848326080 848680832 849023680 849350528 849654784 849930496…
784748928 784754624 784764032 784777280 784783616 784767232 784713536 784619456 784487360 784324480 784137856 783933504 783720320 783514816 783347904 783264000 783308416 783511168 783859840 784292352 784718848 785077056 785362176 785623936 785933120 786349824 786907712 787601536 788391936 789216640 790016832 790756096 791424704 792035904 792608320 793153408 793669760 794149504 794585472 794979712…
810826112 810997952 811184064 811362624 811504768 811588160 811604224 811558592 811465280 811335040 811170624 810968576 810729088 810465536 810214592 810039232 810012416 810202880 810627968 811230720 811892224 812497088 812992448 813393920 813759296 814150208 814612224 815157760 815768512 816406144 817031232 817619008 818164608 818677504 819170176 819646976 820101440 820522432 820900480 821235136…
834663232 834469760 834258624 834034432 833795392 833535680 833252800 832948864 832630080 832304768 831981504 831668544 831381120 831138304 830972416 830922112 831018304 831265280 831619392 831993856 832291008 832460160 832518848 832534400 832585856 832733504 833009728 833410880 833902272 834431232 834948096 835420608 835838144 836209152 836545728 836856320 837141888 837399424 837629376 837839232…
872793664 873000576 873208320 873384384 873496960 873526336 873474944 873363712 873225984 873092480 872980800 872892608 872822656 872767104 872737728 872761472 872875392 873113856 873477632 873923904 874377152 874769152 875079104 875329408 875569920 875848064 876199104 876630016 877123328 877642496 878146752 878606592 879010304 879362432 879677376 879967744 880241920 880501248 880746944 880979712…
823329472 823503104 823696896 823887360 824040896 824129792 824141568 824082112 823968640 823816960 823633664 823416384 823162176 822878464 822596160 822371200 822274240 822375360 822703040 823217792 823820032 824404288 824912640 825347392 825749824 826170944 826647872 827187968 827772160 828362432 828921920 829430144 829887296 830308288 830712000 831107712 831494272 831862720 832204160 832516160…
824977472 825078144 825112896 825077952 824969792 824790656 824553920 824283200 824004352 823737728 823487488 823248896 823014784 822788864 822595648 822480768 822498624 822691712 823057856 823534720 824021824 824434944 824751040 825005312 825262976 825585920 826015104 826553728 827173440 827822976 828452288 829029440 829548032 830019904 830462976 830887232 831289728 831659392 831986176 832267904…
793021440 793249600 793471616 793660224 793784960 793821952 793766144 793634944 793460096 793272704 793091328 792919104 792749184 792581184 792432384 792344384 792371776 792568064 792946880 793461504 794017344 794524992 794948800 795312576 795677248 796106496 796646592 797310016 798072896 798885504 799692736 800455104 801153536 801793088 802385536 802940800 803460032 803938368 804372928 804768000…
875622080 875992640 876294336 876519104 876658496 876709440 876680192 876587968 876453952 876297600 876132352 875962368 875792704 875631744 875499200 875425024 875439040 875557888 875764160 876006400 876213888 876341632 876387456 876388352 876395392 876454912 876595136 876820736 877116224 877454592 877812032 878175936 878547392 878933696 879337664 879748288 880142464 880489664 880766016 880964096…
892155968 892265344 892353088 892391872 892357696 892239104 892040128 891782272 891495296 891211072 890948800 890716928 890517504 890353472 890238400 890196992 890258240 890440896 890731648 891076672 891399552 891641408 891786944 891863808 891920832 892007936 892162496 892399616 892713216 893078016 893463232 893840640 894191616 894508352 894789056 895033472 895241344 895412160 895549376 895660224…
799021824 799183488 799304832 799375104 799388736 799350784 799279808 799203776 799146496 799113792 799091136 799047296 798950592 798788224 798576768 798370240 798247936 798300160 798584896 799090944 799732416 800398656 801016448 801570432 802094400 802640960 803257152 803963072 804750528 805582400 806413376 807204288 807931392 808589312 809184128 809723136 810211648 810654976 811059776 811436736…
757595392 757888640 758121920 758257920 758269760 758156416 757946944 757689216 757434688 757217792 757048320 756920000 756827712 756784576 756832192 757034944 757455168 758122944 758996480 759964352 760883456 761656512 762271104 762784128 763283456 763843072 764508288 765283648 766142592 767041536 767941376 768818048 769663872 770477824 771256960 771988928 772659456 773258240 773786496 774255808…
780521600 780675072 780803776 780895296 780935424 780914560 780837120 780720960 780588480 780455104 780320832 780173952 780001472 779803008 779602560 779454016 779424384 779578368 779939712 780467904 781069184 781649152 782158784 782606784 783041408 783518848 784083264 784749056 785499712 786294336 787090240 787855104 788575744 789256128 789905792 790530496 791127232 791689472 792210304 792689408…
780730368 780823680 780913472 780993024 781047360 781066368 781049600 781009344 780960896 780911104 780851840 780765888 780638720 780472768 780301056 780186688 780206528 780432128 780882368 781503808 782184128 782815232 783347520 783798912 784230656 784711232 785291392 785983936 786766528 787587456 788393728 789147968 789837312 790471680 791067072 791636224 792179520 792690112 793161536 793593152…
796672064 797156160 797369664 797318272 797010624 796472640 795751424 794910592 794014592 793114304 792230400 791357632 790481728 789596416 788727872 787947520 787360384 787096704 787248512 787810432 788664320 789642048 790615616 791535808 792422720 793321536 794269888 795273664 796306752 797317184 798256256 799094464 799830528 800484416 801082240 801643264 802175680 802680192 803157888 803613376…
823647744 823778816 823909632 824027840 824115456 824158016 824148544 824092416 823996992 823866880 823701248 823492864 823241600 822959680 822683840 822477888 822417344 822577536 822985088 823590592 824275712 824918528 825454720 825889408 826275840 826676544 827140736 827688384 828307392 828960576 829607360 830216128 830773760 831284992 831760320 832206592 832622848 833003328 833343680 833646080…
818907904 819085632 819278080 819463552 819612864 819704064 819728064 819693824 819619200 819519488 819400128 819254976 819079040 818875648 818670976 818517312 818482560 818635008 819003776 819548672 820166720 820748608 821237824 821639360 822002496 822385024 822833856 823366528 823972352 824615808 825256832 825864192 826423488 826936960 827413952 827861632 828281088 828669760 829025984 829352960…
845791424 845819072 845860160 845899456 845913088 845880640 845787840 845635136 845431488 845192960 844932416 844660352 844388352 844132416 843921664 843799360 843810368 843989184 844328640 844771648 845225600 845612800 845904256 846122816 846321792 846555840 846867264 847269440 847748032 848266304 848783744 849268096 849704896 850097664 850458816 850801536 851131520 851449600 851753600 852041920…
849003200 849058304 849085632 849087232 849060992 849006208 848924480 848823424 848710144 848590912 848466624 848336192 848202880 848076416 847982208 847955648 848035200 848245312 848576256 848979584 849381440 849725824 849999360 850230656 850468032 850757376 851131264 851595904 852134144 852710208 853286080 853830080 854324352 854764352 855152128 855490368 855782848 856032896 856250432 856448512…
792460224 792607488 792779840 792956480 793104256 793194944 793215104 793172672 793087872 792982848 792868736 792743680 792601536 792443520 792290432 792188928 792201536 792392512 792789824 793359616 794014208 794656320 795231232 795737792 796214528 796710080 797263936 797891072 798580352 799301312 800021696 800719296 801386560 802028480 802651648 803254976 803830400 804364032 804846528 805277568…
810620736 810831808 811066496 811285312 811449792 811538176 811555456 811523648 811470208 811406080 811321408 811193024 811001920 810751744 810482304 810273536 810225664 810441280 810968256 811760128 812684864 813592064 814389504 815059328 815641280 816191424 816759744 817370560 818024320 818702016 819381888 820045120 820680384 821281600 821840896 822346944 822790528 823170368 823499840 823801216…
825105344 825033472 825007168 825004800 824998016 824959488 824876608 824751808 824597824 824429760 824254848 824075328 823892672 823715648 823568192 823488896 823522432 823698624 824008128 824392768 824766912 825067136 825287168 825470016 825682688 825982976 826405824 826948544 827574592 828223552 828836928 829375296 829826752 830203776 830529984 830826176 831102464 831361600 831604544 831834112…
794415424 794478464 794551040 794608640 794616640 794545152 794378816 794125120 793809664 793463488 793113536 792778112 792471872 792212288 792031680 791977472 792100160 792430720 792946240 793562304 794158720 794645376 795004480 795284416 795564544 795917376 796391680 796996032 797704832 798466112 799226240 799945216 800605952 801208512 801761024 802269440 802734272 803155136 803538112 803896128…
844661056 844608704 844534272 844440064 844323136 844177920 844001984 843798528 843573504 843336000 843094016 842855552 842633920 842449408 842333504 842326656 842463680 842755200 843163200 843605248 843979648 844228608 844358528 844428928 844515776 844680256 844959616 845356160 845841664 846367808 846887424 847365504 847788608 848161344 848494592 848797248 849072768 849320128 849539136 849734400…
845421248 845823680 846207168 846546688 846817984 847006656 847117632 847170240 847188480 847188352 847166528 847104768 846982784 846793728 846556224 846325632 846183936 846230464 846532352 847083712 847791296 848525312 849189120 849745792 850215168 850641728 851071680 851533760 852034368 852560896 853092544 853611648 854108416 854582016 855033216 855458304 855848896 856194240 856489280 856736768…
808798848 808883840 808969856 809045312 809091008 809086976 809024384 808906304 808744128 808551360 808337344 808105024 807861504 807620800 807414336 807292864 807313472 807521728 807920256 808449024 809003200 809493504 809890304 810223360 810556672 810950016 811445632 812049536 812736832 813456576 814158080 814804288 815380224 815892160 816355520 816782976 817182336 817555136 817903680 818233344…
774845504 774927168 774985600 775009472 774986368 774910144 774789504 774642304 774491072 774347840 774208960 774060416 773888576 773694208 773504128 773372928 773366784 773548608 773934720 774477056 775077952 775643584 776132992 776564800 776994752 777481472 778066496 778757760 779531648 780342016 781143616 781904512 782615488 783281728 783910720 784503808 785051264 785541440 785967872 786336640…
831898880 832024000 832139456 832226880 832265472 832239552 832148800 832010112 831847104 831682560 831527104 831379072 831232192 831087808 830960448 830885376 830907264 831064448 831363200 831763712 832188032 832565440 832867520 833111680 833344448 833616960 833968896 834416064 834950208 835541056 836154624 836760896 837340416 837887296 838398272 838869248 839293120 839662784 839975808 840237440…
784665536 784755776 784809792 784822400 784784768 784696832 784572736 784437184 784315712 784222336 784151552 784082496 783994240 783880832 783763840 783693440 783734080 783945792 784343552 784878208 785451712 785972736 786403520 786768320 787129152 787550720 788083008 788741248 789505152 790329280 791162112 791961792 792707584 793395264 794029056 794612224 795142720 795620096 796049856 796445632…
837862656 837720640 837585536 837453632 837315968 837169024 837016128 836867840 836730752 836601792 836465984 836302464 836099392 835862592 835626496 835452736 835414912 835583104 835978752 836552064 837190272 837782144 838270976 838664576 839010624 839362624 839759232 840212160 840706944 841214272 841706304 842168640 842603008 843020544 843430784 843833216 844216640 844566528 844873024 845137664…
831680704 831817216 831944704 832051776 832120576 832135744 832092352 831998464 831873728 831737792 831603712 831473152 831344960 831222208 831122368 831082752 831151296 831373696 831760768 832268224 832806016 833287872 833674624 833981504 834258624 834560768 834932736 835393472 835935040 836528320 837137856 837733248 838297792 838826752 839320128 839776448 840188736 840549568 840855872 841113536…
830166656 830304384 830421376 830533440 830650688 830772928 830891584 830991424 831056000 831072256 831034304 830943808 830814592 830667520 830534848 830462144 830498112 830688320 831045888 831535040 832075648 832584512 833016832 833375808 833698496 834034368 834428352 834905792 835468608 836094272 836745728 837384512 837980672 838522176 839010496 839455040 839865792 840249280 840606016 840931648…
841009344 841135424 841233664 841296896 841314240 841278976 841193920 841073920 840938560 840803904 840673856 840540800 840392960 840226752 840055488 839914944 839854400 839924480 840147840 840501952 840922752 841340992 841718144 842054080 842379776 842733440 843146432 843626560 844158656 844709248 845242816 845734016 846172288 846563200 846917696 847245632 847550976 847834944 848099456 848348864…
898896704 898899456 898905280 898905152 898885568 898833536 898737024 898594304 898409408 898196160 897969792 897745792 897538432 897358720 897217152 897123776 897084480 897096320 897142336 897198656 897240064 897260032 897273024 897308352 897399744 897571200 897833280 898176064 898572480 898982720 899369920 899708864 899989696 900219200 900411456 900581184 900738880 900888832 901032512 901168512…
802932864 803019200 803127424 803244608 803346112 803409600 803426112 803403264 803355648 803291520 803205120 803078784 802895808 802657472 802391744 802161856 802048448 802131904 802447232 802958208 803563968 804153920 804662080 805084736 805464192 805859968 806323776 806880960 807525888 808226688 808943488 809641216 810296128 810899264 811446400 811932928 812354880 812710784 813010240 813269376…
861005952 862384640 863638912 864535616 865018112 865201344 865311744 865552384 866016320 866640256 867251968 867652736 867714560 867431872 866911104 866336576 865896000 865728000 865843584 866119872 866366784 866457664 866399552 866302208 866300736 866484480 866871168 867398400 867955264 868420864 868728576 868886464 868970688 869074496 869263168 869540736 869855936 870133568 870320128 870415680…
856285248 856379776 856453888 856505152 856526656 856514944 856469440 856396736 856308224 856211904 856110464 855998784 855869440 855720704 855562240 855421888 855338880 855362368 855522304 855809984 856176576 856557184 856910848 857230656 857538752 857866624 858241408 858672640 859150848 859649408 860138112 860593472 861004992 861375168 861713536 862027200 862318656 862586048 862827328 863044864…
862913024 862516800 862213824 862018304 861931840 861941440 862020928 862134144 862235520 862281216 862241344 862104640 861884160 861610240 861328128 861090368 860941696 860913856 861000768 861160512 861330432 861466688 861568064 861669184 861818496 862056896 862403200 862847168 863350592 863855424 864308224 864673152 864943104 865135552 865281216 865410560 865543744 865689536 865848064 866015552…
854002624 854070144 854141056 854230400 854340608 854466112 854596096 854720384 854829120 854912064 854959808 854965312 854928128 854857792 854775680 854718912 854727872 854841280 855075136 855409088 855793088 856177344 856536640 856878080 857228928 857619008 858068608 858579648 859136000 859708736 860268864 860796672 861285568 861740352 862168128 862573248 862954944 863307328 863626944 863913280…
830133952 830136512 830135936 830125824 830091584 830017856 829893248 829716672 829495360 829247744 828991552 828747840 828539584 828389824 828329984 828397824 828624448 829020480 829551872 830139520 830684800 831121216 831439360 831681536 831912640 832191168 832560448 833034240 833600448 834225536 834870528 835500928 836095168 836645952 837151168 837611264 838024960 838390272 838709952 838991040…
850496384 850513984 850531648 850543232 850548032 850548800 850551744 850560704 850570496 850567424 850533760 850457152 850337856 850193920 850062720 849997312 850053632 850276864 850671936 851193152 851753216 852270336 852702912 853054208 853358400 853657664 853989696 854377472 854827520 855332544 855874304 856431040 856980288 857503360 857985152 858415424 858791488 859117568 859406656 859672384…
831223296 831166592 831120448 831085632 831052608 831008832 830941056 830843904 830714432 830554368 830365120 830153024 829929216 829716352 829551744 829487744 829577856 829861632 830329344 830913792 831505024 832011776 832403264 832708608 832988224 833304384 833702592 834198848 834780800 835412608 836053440 836670464 837246720 837781056 838280704 838750208 839188032 839588480 839944384 840252928…
852809344 852372800 851993152 851650496 851325056 851014336 850735424 850516160 850383296 850338944 850358784 850399680 850415488 850380608 850298112 850203648 850154240 850215360 850423360 850759104 851149504 851505344 851772672 851943616 852046976 852124096 852213056 852336128 852498368 852693632 852911552 853148352 853412352 853717632 854081984 854517440 855026688 855605184 856244352 856935360…
858442176 856904128 855211968 853592832 852261888 851409024 851172160 851589760 852578752 853933824 855393600 856696704 857646592 858155136 858214208 857881920 857254080 856467712 855685248 855066624 854744640 854788864 855209344 855979008 857044352 858326656 859705344 861027072 862124736 862846208 863116992 862961216 862500480 861907776 861373120 861061184 861076224 861467520 862224256 863286080…
795062016 795584128 795922368 796191040 796442688 796611200 796537856 796088512 795251520 794197440 793208448 792582016 792512768 793034944 794048128 795364608 796788928 798139136 799295040 800195456 800801344 801069440 800952704 800431680 799562048 798491520 797465792 796765184 796627136 797169600 798326208 799877568 801534784 803082048 804427776 805615680 806749184 807901248 809034880 810004736…
801614464 801755904 801892992 801999808 802049088 802023040 801919424 801753408 801547392 801320896 801082752 800833280 800573248 800315776 800098112 799980288 800031936 800306368 800796352 801416000 802022848 802499008 802811136 803005056 803170560 803395968 803747200 804247616 804880000 805595008 806334400 807052160 807723840 808347008 808929280 809474240 809976832 810426048 810813504 811139520…
824315648 824377664 824450752 824520640 824564352 824561920 824501952 824384256 824217536 824011136 823772224 823506496 823223808 822942592 822699840 822549952 822551808 822750912 823142464 823656320 824174528 824596992 824888320 825080064 825238720 825430976 825708160 826090112 826567616 827108224 827674496 828236032 828776832 829294080 829789248 830258944 830694208 831083520 831419968 831705216…
835988992 836076288 836161664 836224832 836240064 836187264 836058624 835863744 835625472 835368960 835110976 834859264 834616320 834387520 834194176 834073856 834072768 834231232 834551232 834983296 835438336 835834624 836139648 836371968 836583104 836827904 837151424 837569792 838073152 838629376 839199936 839753856 840275520 840763776 841223360 841656704 842060096 842425216 842745984 843021248…
808023296 808097984 808165056 808209664 808215808 808171392 808075072 807938368 807777728 807604544 807421504 807223744 807006656 806777664 806564736 806416448 806390912 806538304 806863616 807314880 807795776 808220672 808558208 808834944 809110848 809448960 809896448 810466368 811140928 811874944 812619456 813334720 814001152 814616256 815185856 815713088 816195648 816628736 817011648 817351424…
781323776 781365312 781433536 781509248 781559680 781553472 781471040 781313472 781096704 780841472 780562432 780264640 779949312 779623232 779311616 779065728 778952128 779040704 779362432 779882176 780500672 781107200 781636608 782083840 782490688 782915136 783409472 784002176 784691776 785452032 786245504 787036288 787799680 788523968 789205248 789840576 790426688 790962688 791452736 791906112…
770385600 770422848 770498176 770600256 770688448 770715328 770648704 770484928 770246656 769971072 769688896 769420160 769175232 768963776 768811328 768764416 768880832 769211200 769758144 770454912 771182016 771833216 772365184 772805504 773222208 773685888 774249984 774930944 775710592 776544960 777385728 778196160 778958848 779672256 780338432 780952896 781505728 781985536 782391872 782738560…
755562944 755805440 756022848 756218368 756379072 756491072 756544640 756543936 756501056 756427904 756327040 756194432 756025472 755828224 755637056 755516160 755545344 755806400 756332992 757076672 757920320 758739776 759470848 760122688 760753600 761430336 762202368 763080960 764037952 765017088 765960640 766827840 767608960 768318016 768979392 769613312 770226240 770814976 771373120 771898752…
729833536 730012992 730168256 730285120 730340096 730311936 730190400 729982848 729710848 729401344 729075136 728744640 728417728 728107328 727842816 727677696 727676608 727900544 728364864 729016448 729742912 730436544 731049472 731601472 732155520 732780736 733529216 734417024 735423232 736497728 737584512 738639680 739638912 740578752 741461632 742286592 743046208 743732160 744342272 744886272…
792489472 792556160 792591488 792580544 792513856 792384960 792195328 791952512 791665216 791338624 790977088 790585920 790181248 789792832 789471744 789286656 789302912 789563392 790046848 790658816 791262080 791752832 792107840 792379008 792651776 793004608 793490688 794119744 794864320 795668352 796473088 797232448 797923328 798542720 799095680 799586048 800012864 800376192 800682304 800946880…
823938112 823912064 823835456 823710080 823540416 823337152 823121664 822918464 822748096 822615104 822508800 822406528 822290048 822158976 822035584 821967488 822011200 822216960 822591616 823082176 823594048 824043776 824402752 824698432 824987840 825327296 825753984 826274368 826866368 827488384 828099072 828670144 829193856 829678208 830136256 830577152 831002176 831407232 831787648 832141824…
777812288 778021952 778222656 778396992 778522112 778580608 778570304 778504128 778401920 778276800 778128000 777941120 777703872 777415296 777103680 776830016 776677120 776734720 777052480 777600576 778273984 778948800 779551104 780075776 780568448 781091264 781694592 782398208 783188800 784025088 784860992 785660160 786407104 787103552 787759936 788382272 788970240 789518784 790025856 790494976…
830993472 831126272 831270848 831408320 831516800 831577024 831582016 831541568 831471488 831387264 831296000 831194432 831076032 830942848 830810560 830715776 830708096 830838080 831131072 831569088 832095360 832642816 833168960 833665472 834152064 834658944 835210880 835815104 836461632 837124928 837779456 838406208 838997888 839556736 840086976 840589120 841058176 841487424 841873152 842216320…
868862912 869020288 869149184 869240320 869286528 869284672 869240192 869166464 869076160 868979520 868880384 868774336 868658752 868537152 868426432 868357696 868369344 868494208 868740480 869080256 869458176 869818048 870133504 870408256 870670720 870956096 871293312 871694016 872151360 872642432 873139520 873619776 874069184 874484800 874868544 875222784 875546880 875838528 876095808 876319552…
811881856 812016704 812114496 812167232 812168064 812116864 812024832 811911872 811798464 811695232 811599424 811495424 811367872 811213440 811052096 810931008 810912960 811061504 811406080 811919232 812523072 813127168 813676160 814159872 814607232 815061888 815563648 816131840 816763136 817434112 818114368 818778624 819411328 820008640 820570880 821097088 821582784 822023040 822416704 822768448…
796597376 796901760 797181376 797412480 797564288 797613632 797555264 797407744 797204608 796981952 796760512 796546176 796334208 796124352 795936064 795815552 795827008 796032960 796458304 797062848 797749952 798415296 798997056 799490432 799936128 800388480 800896128 801480384 802132928 802821952 803508992 804166464 804782464 805362112 805916672 806453248 806969920 807459456 807915392 808337344…
846941376 847025088 847099712 847154240 847176064 847159808 847109248 847035392 846951936 846867520 846778688 846676032 846549056 846396992 846235456 846099264 846032640 846078272 846254720 846542336 846887680 847236352 847557760 847854912 848153856 848484736 848869760 849313664 849802368 850309760 850809600 851283904 851724032 852131776 852507648 852849600 853150912 853406656 853617984 853793920…
825558720 825692352 825749952 825722112 825608768 825419968 825177664 824910656 824646592 824401344 824174336 823954368 823729536 823501504 823297664 823168896 823179648 823386432 823800640 824371328 824996288 825573888 826051264 826428992 826748800 827063616 827419456 827836736 828313344 828828096 829354688 829875200 830382912 830882048 831377344 831867136 832342016 832787776 833191744 833548288…
822927296 823041408 823147328 823236608 823291520 823297024 823245952 823144256 823006656 822848576 822676992 822490560 822284480 822061824 821843904 821673664 821608000 821705856 821993152 822443392 822979712 823516480 824002752 824433344 824837952 825256576 825722752 826246656 826816960 827405248 827980736 828523200 829027008 829497728 829944000 830371264 830776448 831155008 831504000 831825472…
834723136 834698880 834667264 834621568 834551296 834449984 834318144 834166592 834005760 833841856 833670400 833480128 833261312 833017344 832771968 832570624 832467584 832512640 832718656 833046976 833419968 833763584 834048064 834288960 834531264 834822784 835196544 835657216 836182464 836732608 837268352 837764736 838217152 838633984 839028160 839405568 839762560 840090496 840383168 840642624…
849227840 849249344 849351296 849485568 849573184 849552448 849406592 849173952 848925888 848723136 848585536 848491648 848399232 848279552 848140800 848032320 848027136 848191232 848534016 848988544 849438720 849793408 850037824 850227840 850445120 850752256 851175936 851695680 852262848 852822272 853341888 853823040 854293760 854781248 855291648 855802688 856276544 856679744 857004864 857271552…
848969408 849128448 849353408 849599680 849792960 849878784 849854400 849769728 849697344 849689472 849743040 849804864 849802304 849686272 849457024 849178368 848956480 848916864 849136896 849597248 850185024 850766528 851267648 851691008 852090176 852521536 853017024 853568320 854137408 854676544 855158016 855584704 855985472 856390400 856810304 857227456 857608704 857922304 858160704 858344640…
906636992 906587072 906569984 906547904 906465216 906289280 906029376 905737600 905482048 905311680 905229440 905199808 905173568 905118336 905038592 904974656 904979840 905095680 905308672 905550144 905725760 905786112 905751168 905695552 905699456 905812224 906040256 906348864 906680064 906977984 907218560 907415104 907605440 907823360 908077376 908343552 908584512 908766784 908884672 908961024…
800204864 800370304 800524416 800643904 800701440 800682752 800595648 800466368 800328512 800202944 800088896 799969088 799823744 799650048 799474240 799356288 799372224 799593344 800039168 800649472 801300736 801875904 802326784 802678912 803002944 803372928 803843904 804432576 805119104 805857408 806598208 807305216 807964992 808581312 809162624 809710912 810218688 810673664 811069568 811410496…
791055552 791262912 791429760 791548096 791612480 791619008 791572672 791484544 791370624 791244352 791111616 790970944 790818624 790657664 790508416 790410176 790416512 790584256 790939264 791453248 792044352 792621760 793133248 793580032 794001152 794448704 794967808 795580608 796280448 797037376 797810368 798563712 799274048 799936128 800551680 801123968 801651392 802129600 802555968 802933568…
843965376 844059392 843991424 843772672 843419648 842965184 842468480 842003648 841645184 841445184 841408448 841496064 841642368 841786112 841886464 841940480 841981376 842070720 842270080 842601216 843032960 843500288 843945792 844346304 844714368 845077888 845463488 845880640 846315776 846734464 847101440 847390592 847599808 847749888 847875648 848015744 848200704 848448384 848765440 849147136…
847307008 846792832 846530176 846485376 846578752 846734336 846911232 847112832 847357632 847646848 847945280 848189632 848315072 848292608 848135680 847903488 847675072 847521984 847466432 847468736 847454272 847379008 847263168 847185152 847235776 847480896 847942528 848590592 849356416 850153664 850915456 851608000 852226432 852777024 853253952 853630656 853876416 853972928 853936704 853817344…
847905984 848069248 848234432 848367680 848432320 848397952 848250496 847996032 847658816 847275136 846877696 846492928 846142912 845846080 845631040 845537856 845605824 845857472 846267008 846751552 847194816 847508672 847675456 847737984 847771712 847844416 848007872 848280000 848646336 849068480 849503488 849916608 850292352 850635712 850956928 851266880 851566784 851850176 852108672 852336512…
833887232 833886400 833880320 833873280 833852224 833797824 833696448 833549120 833371200 833186624 833016576 832873152 832761408 832684416 832653504 832691776 832828352 833087872 833467008 833924608 834391872 834812864 835171584 835492928 835823744 836207296 836672640 837223488 837840896 838487808 839126208 839729536 840286080 840797568 841270912 841710784 842116928 842488128 842826688 843140480…
855741376 856102144 856459072 856784768 857051456 857240384 857347200 857380608 857358848 857297728 857206144 857086592 856939840 856774912 856617152 856511360 856514176 856682048 857038272 857550784 858137024 858705664 859204480 859629056 860009984 860385792 860789632 861232960 861708672 862194816 862667072 863108672 863514304 863886208 864230144 864548416 864839424 865101376 865336320 865551168…
813627264 813821952 814000768 814156352 814274112 814340800 814350336 814308608 814228992 814125056 814003456 813865152 813709632 813545152 813397440 813312448 813347264 813556800 813957376 814508032 815117248 815694272 816197376 816639872 817073152 817552384 818121472 818792448 819547200 820341632 821125056 821856512 822514624 823098816 823620352 824092096 824523520 824920704 825290304 825639360…
742603904 747347840 751028352 752833472 752372544 749705344 745313216 739940672 734444992 729605504 725886080 723425920 722071296 721525888 721477888 721707008 722139520 722828992 723888000 725365824 727170432 729086976 730900800 732490752 733873856 735173504 736581632 738289088 740428864 743024832 745966080 749024000 751895616 754302528 756025152 756947264 757075712 756527872 755507072 754245312…
813142912 813336320 813571712 813801600 813971776 814041280 813994624 813846528 813632064 813388352 813137984 812887744 812634176 812380800 812152192 812000704 811992768 812187200 812593664 813151552 813748352 814283456 814721344 815096256 815484160 815959232 816568384 817310656 818139392 818977600 819755392 820432256 821009600 821518080 821995456 822464384 822922688 823352768 823736576 824071488…
799997632 800003456 800013056 800036096 800069248 800106176 800138688 800163136 800173568 800160128 800107328 800000128 799834112 799625728 799416960 799276416 799281280 799500096 799948416 800569280 801251456 801885888 802421888 802874176 803298048 803756160 804297024 804933824 805648128 806396544 807132352 807823552 808459520 809048704 809605760 810140224 810650432 811126720 811558976 811943232…
743297216 743438336 743604736 743776320 743920512 744008384 744029056 743992256 743920832 743832704 743732160 743607808 743445120 743246528 743043776 742905472 742924416 743194432 743758720 744572736 745511872 746436224 747265344 747989888 748659776 749342272 750092864 750932480 751846080 752789696 753714880 754587456 755396544 756153024 756875712 757576832 758257600 758909696 759522688 760091072…
767247296 767414528 767568576 767694656 767771328 767784960 767739840 767659072 767573248 767505728 767460096 767421888 767373120 767310208 767255936 767267776 767421568 767790016 768393344 769170368 769992320 770737472 771352832 771866688 772356800 772908608 773589184 774422400 775388864 776430272 777476672 778468928 779371776 780179904 780904064 781560896 782162240 782718336 783239616 783737472…
847669120 847790080 847871552 847897024 847853568 847736896 847555520 847328576 847078144 846824512 846577536 846337664 846104576 845884608 845698752 845589056 845605952 845796224 846170112 846683136 847244736 847767232 848211264 848588992 848946304 849333504 849788352 850322496 850921472 851549440 852167488 852745984 853270592 853744192 854176000 854574272 854942784 855281920 855592192 855878976…
766236928 766371712 766470272 766531136 766544768 766503040 766406016 766265024 766100096 765927488 765752960 765574208 765388032 765202560 765049536 764986752 765084224 765404416 765957056 766675520 767434560 768119808 768686208 769163904 769627328 770153728 770801600 771588288 772492096 773458560 774426240 775345792 776190784 776957824 777655360 778291840 778870784 779394816 779870784 780311488…
833611904 833660864 833718272 833777472 833821504 833836608 833816128 833764800 833694144 833613376 833525376 833427264 833316736 833201856 833107136 833076224 833160192 833401728 833803200 834311168 834830848 835280768 835631616 835911040 836173952 836477760 836862784 837340992 837896640 838493760 839092736 839662464 840187456 840667264 841107648 841512832 841883456 842219648 842524288 842804096…
791803520 792025472 792200832 792306048 792317952 792223808 792025920 791747968 791423424 791087616 790763840 790464128 790194880 789968768 789816448 789789184 789948416 790339520 790951488 791699968 792445504 793072960 793545088 793900864 794218880 794578880 795036992 795611968 796286912 797017216 797753600 798458496 799115072 799724480 800296384 800836992 801344000 801812800 802240896 802632320…
803004288 803041984 803100352 803174656 803246848 803294080 803299840 803258752 803176064 803059904 802918720 802757440 802584384 802415296 802282496 802234560 802327680 802606720 803073152 803667072 804283904 804832832 805280896 805655232 806016320 806424256 806920320 807516096 808192704 808909760 809624768 810306368 810940352 811528576 812077952 812590272 813062464 813488768 813867392 814205632…
808096320 807742912 807418112 807132288 806879488 806650112 806438848 806247168 806081024 805939392 805809152 805669120 805501504 805305664 805108864 804971776 804974080 805197696 805680000 806382144 807194688 807996032 808714112 809340224 809914496 810487616 811099840 811761728 812454592 813140160 813779648 814349376 814846720 815284736 815681856 816049600 816390912 816703232 816986176 817246528…
840715392 840602176 840479104 840347200 840201664 840041216 839868992 839695808 839532480 839385536 839252608 839124992 838997376 838875200 838779072 838747456 838819584 839021696 839339008 839710912 840052096 840302720 840457024 840559104 840676288 840870080 841182144 841621248 842162880 842758336 843353728 843906944 844395200 844818944 845188224 845517120 845814464 846085632 846335936 846570880…
796336448 796684736 796961664 797160256 797278144 797317632 797292608 797226048 797142720 797058496 796973952 796875712 796746368 796581824 796400192 796250944 796203520 796336192 796692352 797249024 797918272 798593664 799209920 799758208 800275392 800812480 801412096 802091008 802837504 803616384 804387904 805123392 805812288 806459264 807075648 807666944 808229312 808753408 809231232 809662016…
825743040 825860352 825967872 826038976 826042560 825951296 825753536 825459904 825099776 824714560 824339200 824000320 823714240 823492672 823352960 823321280 823425280 823677824 824054464 824490304 824898240 825219648 825448832 825627072 825816128 826069056 826419456 826869376 827394112 827949824 828493504 828995264 829445056 829847936 830215360 830555968 830871744 831162176 831428544 831674944…
809215744 809345984 809506752 809678848 809830272 809934848 809981760 809982656 809956864 809919872 809869568 809788352 809654464 809460736 809226624 809007424 808882752 808943488 809244288 809765312 810412992 811070336 811662144 812174912 812644224 813122816 813656000 814260992 814927040 815619712 816300864 816942976 817536640 818087680 818606208 819097536 819557248 819977216 820351872 820683392…
768333120 768363264 768399552 768438848 768458240 768430272 768333312 768164672 767932736 767655872 767349248 767024832 766696320 766384576 766128384 765987392 766024768 766288384 766769920 767391872 768028992 768582464 769024576 769399360 769788032 770264384 770877120 771629760 772485376 773377984 774243392 775037632 775745792 776379712 776958912 777498560 778002688 778469440 778899200 779299136…
1.12695e-08 1.12819e-08 1.12945e-08 1.13066e-08 1.13168e-08 1.1324e-08 1.13281e-08 1.13294e-08 1.13286e-08 1.13261e-08 1.13211e-08 1.13123e-08 1.12985e-08 1.12794e-08 1.12565e-08 1.12335e-08 1.12157e-08 1.12098e-08 1.12206e-08 1.12488e-08 1.12899e-08 1.13366e-08 1.13827e-08 1.14256e-08 1.14657e-08 1.15051e-08 1.15459e-08 1.15889e-08 1.16336e-08 1.16782e-08 1.17206e-08 1.17598e-08 1.17957e-08 1.18…
1.02511e-08 1.02572e-08 1.02638e-08 1.02703e-08 1.02755e-08 1.02781e-08 1.02776e-08 1.02743e-08 1.02691e-08 1.02627e-08 1.02552e-08 1.02458e-08 1.02341e-08 1.02202e-08 1.02056e-08 1.01938e-08 1.01894e-08 1.01975e-08 1.02207e-08 1.02574e-08 1.03012e-08 1.03448e-08 1.03833e-08 1.04159e-08 1.04448e-08 1.04733e-08 1.05043e-08 1.05392e-08 1.05777e-08 1.06179e-08 1.0658e-08 1.06961e-08 1.07314e-08 1.07…
1.28702e-08 1.2856e-08 1.28439e-08 1.28339e-08 1.28248e-08 1.28148e-08 1.28022e-08 1.27863e-08 1.27665e-08 1.27434e-08 1.27174e-08 1.26897e-08 1.2662e-08 1.26365e-08 1.26167e-08 1.26064e-08 1.26094e-08 1.26275e-08 1.26579e-08 1.26938e-08 1.27258e-08 1.27477e-08 1.27592e-08 1.27649e-08 1.27714e-08 1.27843e-08 1.28077e-08 1.28421e-08 1.28856e-08 1.29342e-08 1.29834e-08 1.30297e-08 1.30715e-08 1.310…
794551488 794696000 794834816 794948736 795019904 795042432 795024192 794985984 794948224 794918912 794886912 794829120 794723648 794568192 794390400 794249024 794218496 794370816 794730624 795256832 795852096 796417024 796901568 797314368 797705664 798135680 798654080 799279104 799998784 800776832 801570560 802347008 803087872 803788608 804448960 805064768 805627456 806128832 806568704 806956096…
801513088 801394112 801275584 801173568 801089344 801013696 800934592 800843840 800738752 800616576 800475712 800312704 800131008 799942720 799779072 799686720 799716288 799906368 800252928 800703232 801171008 801587648 801933120 802238400 802562560 802962752 803476032 804104384 804818048 805562432 806286528 806954816 807557952 808107200 808619840 809107840 809570624 809999552 810386752 810731648…
735162880 735534528 735891392 736195840 736407744 736507712 736508160 736450048 736384640 736345088 736326912 736291840 736185280 735970240 735647552 735276480 734964096 734854592 735067136 735627904 736451712 737388992 738312704 739166208 739965824 740768640 741638272 742613056 743695680 744851968 746028992 747174848 748253248 749250304 750166016 751005760 751774208 752475840 753118464 753713856…
836624320 836477056 836281152 836064384 835847168 835647680 835482304 835364928 835298560 835270208 835254656 835220096 835145408 835029952 834897856 834795008 834773376 834875136 835100224 835398720 835687872 835903616 836036864 836127552 836240384 836435840 836755200 837206016 837767104 838391616 839029440 839640896 840201920 840707712 841158848 841556160 841897664 842182528 842416704 842614720…
818003904 818038464 818029888 817967040 817841792 817651520 817402560 817108544 816787520 816454336 816119744 815792192 815482688 815212096 815016576 814943680 815039168 815324160 815763776 816269312 816726272 817059264 817268736 817414912 817581504 817837760 818226560 818749696 819375680 820050176 820719360 821347328 821922176 822449856 822943424 823408000 823839360 824226752 824562304 824845568…
850808640 851070784 851297536 851453184 851507904 851444480 851264832 850989696 850653184 850292352 849936960 849606400 849314048 849072320 848903808 848843008 848923712 849163968 849535872 849964096 850343872 850602176 850730560 850775424 850811840 850909440 851121536 851468864 851940864 852499968 853098304 853692544 854251072 854760512 855216320 855615680 855955264 856231552 856444544 856601408…
1.09125e-08 1.09149e-08 1.09174e-08 1.0918e-08 1.09148e-08 1.09061e-08 1.08919e-08 1.0873e-08 1.08514e-08 1.08295e-08 1.08088e-08 1.07899e-08 1.07732e-08 1.07588e-08 1.07479e-08 1.07426e-08 1.07454e-08 1.07582e-08 1.07803e-08 1.08077e-08 1.08342e-08 1.08551e-08 1.08692e-08 1.08791e-08 1.08894e-08 1.09044e-08 1.09272e-08 1.09588e-08 1.09978e-08 1.1041e-08 1.10851e-08 1.11276e-08 1.11674e-08 1.1204…
1.07842e-08 1.07998e-08 1.08171e-08 1.08332e-08 1.08451e-08 1.0851e-08 1.0851e-08 1.08473e-08 1.0843e-08 1.08406e-08 1.08406e-08 1.08415e-08 1.0841e-08 1.08372e-08 1.08299e-08 1.08211e-08 1.0815e-08 1.08168e-08 1.08304e-08 1.08557e-08 1.08886e-08 1.0923e-08 1.09549e-08 1.09835e-08 1.10107e-08 1.10398e-08 1.10733e-08 1.1112e-08 1.11548e-08 1.11991e-08 1.12417e-08 1.12806e-08 1.1315e-08 1.13459e-08…
1.17152e-08 1.17204e-08 1.17261e-08 1.17312e-08 1.17342e-08 1.1734e-08 1.17301e-08 1.17235e-08 1.17156e-08 1.17072e-08 1.16982e-08 1.16873e-08 1.16731e-08 1.16548e-08 1.16336e-08 1.16132e-08 1.15992e-08 1.1598e-08 1.16145e-08 1.16482e-08 1.16935e-08 1.17419e-08 1.1787e-08 1.18264e-08 1.18612e-08 1.18945e-08 1.19293e-08 1.19675e-08 1.20091e-08 1.20529e-08 1.2097e-08 1.21402e-08 1.21815e-08 1.22209…
873032512 873112128 873192320 873270208 873338496 873394944 873442816 873490880 873548352 873613376 873672704 873705984 873694080 873630272 873527808 873419264 873350144 873370944 873510528 873757312 874061568 874366400 874639360 874888256 875142592 875440768 875811008 876261760 876778560 877328960 877874816 878385792 878844544 879250112 879609280 879931392 880221376 880482944 880719936 880936576…
827893952 827917376 827940416 827942720 827903040 827808384 827659712 827473344 827271936 827075072 826890624 826716608 826548096 826389440 826260864 826199616 826251072 826448896 826788800 827216192 827644352 828006144 828288128 828527360 828784000 829112000 829542976 830075136 830677632 831299392 831890624 832419328 832875392 833268288 833614272 833927296 834212864 834474688 834718272 834953088…
842292608 842396928 842500224 842586304 842634816 842635392 842590784 842517312 842435456 842359552 842289536 842214720 842121728 842008064 841892416 841816320 841834048 841999360 842327488 842779520 843267392 843705984 844057664 844337856 844594240 844878208 845227200 845651776 846136448 846647552 847150016 847619648 848047936 848438848 848798912 849129664 849426432 849682560 849898816 850083968…
845786112 845923008 846048192 846158976 846246336 846303488 846330560 846336640 846334144 846328576 846314304 846276800 846199616 846077632 845926144 845784960 845714432 845784128 846039744 846472256 847014144 847576320 848097600 848562944 848996736 849437888 849922304 850466816 851066432 851697792 852330560 852940032 853511104 854040512 854528832 854975616 855377664 855732224 856042048 856317376…
835722368 835635520 835489664 835293440 835056128 834788352 834503104 834215680 833940608 833687488 833458112 833251968 833070848 832928000 832850944 832879488 833050304 833379776 833834176 834333056 834776000 835100864 835312896 835472256 835656640 835933504 836346112 836898816 837565248 838293248 839026560 839720384 840348608 840904896 841392128 841813824 842171008 842465792 842705088 842902016…
852848768 852725952 852607360 852488768 852357376 852203648 852022272 851816192 851593408 851360192 851120192 850875136 850631360 850403264 850219520 850121088 850147008 850321344 850625536 850995648 851344192 851611392 851792384 851931200 852090560 852321920 852657472 853095488 853608704 854151488 854680704 855169984 855613696 856022592 856412800 856793472 857164480 857517248 857843712 858140672…
768654272 768524416 768322688 768094208 767866688 767656128 767476224 767342976 767274304 767280896 767356544 767479424 767616704 767742976 767848832 767951040 768088320 768312768 768664448 769144896 769716736 770327616 770940928 771556992 772203136 772915776 773721600 774621760 775586880 776561216 777486656 778318848 779040576 779662912 780214592 780728000 781227648 781728256 782235136 782749312…
812355200 812639936 812881088 813069376 813194944 813254400 813255936 813214400 813149184 813071488 812979712 812863104 812711040 812524352 812327360 812169792 812116608 812235584 812560128 813064448 813669312 814282240 814844800 815345600 815813120 816288768 816809920 817396224 818043456 818730496 819430912 820121088 820787840 821425600 822031488 822600192 823123520 823593856 824009344 824374976…
846138176 846057792 845967040 845875840 845788864 845702976 845609536 845497536 845357184 845183424 844977088 844747328 844511936 844296704 844133248 844058752 844102400 844275712 844556672 844894656 845227136 845514752 845759040 845993664 846266176 846614144 847058880 847595072 848196736 848823488 849438848 850018944 850555776 851054912 851522880 851961792 852368448 852735168 853058176 853339904…
810348352 810669696 810973824 811241280 811463296 811641536 811790720 811928640 812066944 812198464 812300864 812344768 812309824 812197120 812039232 811901248 811869440 812036352 812458176 813116608 813919360 814748672 815526784 816235648 816905664 817583488 818308864 819096320 819934720 820788672 821618560 822394112 823101376 823743680 824332992 824880512 825392256 825869504 826312576 826722112…
868172544 868073152 867913280 867710336 867479488 867228928 866963328 866687104 866407488 866137152 865892352 865689536 865546432 865478336 865501504 865630976 865872064 866210496 866603072 866987072 867301568 867523584 867672704 867796160 867942656 868146752 868424896 868770880 869163968 869573824 869974336 870350848 870701056 871031360 871350272 871661824 871965504 872258304 872539008 872808832…
810053504 810414784 810688192 810860928 810940224 810944576 810900736 810833664 810759552 810679552 810584256 810457536 810290624 810087680 809877120 809711104 809659328 809796096 810163328 810739520 811438016 812152320 812811712 813401216 813951936 814511168 815123008 815807168 816558976 817345664 818126848 818866368 819544576 820162048 820731968 821271232 821790848 822293952 822777088 823233216…
798485184 798601984 798703296 798773120 798794176 798752448 798648960 798500032 798331200 798163968 798008192 797859328 797705088 797540288 797375424 797242752 797191488 797273536 797518080 797910016 798394368 798905152 799400768 799875840 800354304 800869312 801450048 802106496 802829760 803593600 804370048 805137984 805886464 806612544 807315072 807987584 808619264 809198080 809717888 810179904…
825165952 825313024 825488768 825682368 825869888 826026624 826138688 826209792 826251136 826275072 826283200 826264704 826207168 826107328 825981312 825873344 825843712 825956224 826245120 826690688 827222144 827757184 828242560 828669312 829068672 829486528 829965440 830527040 831167296 831858688 832564672 833252928 833902528 834506624 835067392 835585856 836061248 836491008 836874240 837216256…
835694400 835638912 835630784 835667968 835730112 835789440 835821632 835813504 835764160 835681088 835574720 835455168 835334400 835228224 835158208 835155840 835246336 835440960 835720320 836036928 836331008 836566784 836746368 836907648 837102208 837375488 837756224 838246912 838825856 839455872 840100160 840731456 841335744 841911744 842457984 842968704 843434688 843846464 844201344 844508160…
813374912 813503936 813674112 813863040 814037696 814168000 814237760 814248128 814213696 814150528 814064896 813952576 813802880 813609216 813382720 813159808 812998336 812973184 813144320 813522880 814065408 814696000 815346688 815981888 816602176 817226176 817874880 818557888 819268800 819987008 820689024 821358336 821989184 822587584 823163008 823722624 824267648 824793088 825292992 825761920…
763417536 763448384 763466240 763451328 763382592 763247296 763049344 762807616 762553024 762314560 762106368 761930112 761777024 761643648 761540288 761495424 761546432 761724992 762032576 762430336 762853760 763250496 763609664 763965248 764374720 764893504 765559232 766374912 767309440 768306048 769305728 770263744 771158080 771989568 772768192 773502528 774192640 774833536 775420736 775954304…
811717120 811725760 811672256 811564544 811416704 811251328 811099008 810991680 810950080 810973888 811040512 811111424 811150848 811141824 811095296 811051200 811065664 811195072 811464704 811851072 812290624 812717568 813099840 813447808 813800128 814198976 814675008 815233088 815853568 816502336 817147392 817771968 818378112 818977728 819580544 820182976 820766080 821303232 821772288 822166848…
818937664 819025408 819113152 819189120 819226240 819198208 819091264 818914048 818692480 818458496 818232960 818023360 817825792 817636928 817468480 817352320 817336960 817474368 817788416 818251904 818789760 819321472 819802560 820234752 820653376 821100096 821607360 822182592 822810432 823457472 824090944 824687360 825238720 825748160 826220096 826654080 827044736 827387008 827683840 827946496…
763555328 763563840 763574272 763599104 763627712 763639424 763616000 763549440 763443840 763306624 763142336 762949888 762732032 762500352 762291328 762166144 762198016 762453568 762949312 763627648 764371200 765067456 765667136 766188032 766693568 767250688 767908800 768677952 769532096 770417792 771280640 772083328 772814912 773486272 774115968 774717120 775291648 775834752 776342976 776819328…
832688512 832690816 832648448 832556992 832408896 832200832 831938112 831638208 831327296 831032256 830768512 830539840 830342848 830176000 830050496 829993152 830042048 830230848 830562944 830998656 831463104 831889088 832249088 832559936 832867072 833217792 833649088 834172992 834776768 835427328 836085376 836717056 837300928 837828544 838298432 838710784 839066368 839368512 839626560 839854080…
846309184 846348288 846374336 846378112 846344064 846256320 846107840 845903296 845656960 845387136 845109760 844837888 844585088 844369280 844220288 844179776 844286912 844561280 844974592 845445568 845866496 846166208 846337728 846431936 846523456 846676096 846932352 847301632 847761152 848267840 848776960 849255296 849689280 850081792 850442176 850775040 851080064 851350400 851582784 851780224…
836653056 836732032 836809664 836881024 836929920 836937856 836893760 836801152 836676992 836543680 836417984 836307776 836215424 836141504 836095424 836098432 836177152 836356032 836636864 836988800 837360384 837708288 838024512 838333376 838676096 839087936 839589184 840175616 840819712 841480640 842119168 842710784 843248960 843741312 844199168 844629120 845031680 845402688 845741952 846054208…
808755968 808967104 809180160 809378752 809538880 809637248 809669120 809646848 809591424 809520256 809436416 809326144 809174144 808975680 808750784 808552768 808459072 808556224 808893632 809446080 810110144 810762304 811325440 811788736 812194368 812601408 813062848 813603584 814219264 814878592 815543616 816182528 816780416 817339648 817868416 818373056 818851840 819297344 819703360 820067456…
821467968 821625344 821757888 821859008 821910784 821896512 821808576 821651776 821443456 821203200 820945408 820677632 820405184 820139968 819909056 819760192 819748608 819924032 820293504 820805312 821359488 821862016 822270144 822597632 822896832 823224960 823628160 824123776 824700288 825322944 825949952 826546688 827094016 827587264 828029760 828424576 828771520 829070464 829325952 829548672…
830762176 830824128 830883712 830944192 830989120 830991360 830917120 830741504 830459904 830091072 829672832 829255040 828893184 828638784 828545536 828665984 829038976 829668224 830488960 831372544 832158656 832732288 833065472 833204544 833233536 833239104 833299456 833466496 833768128 834208704 834773504 835434624 836157632 836905600 837636352 838303168 838859968 839266880 839500672 839562432…
805397504 805458880 805489472 805477056 805399872 805241216 805001088 804701248 804376448 804061760 803777792 803529344 803313152 803130560 803000192 802963968 803072064 803366272 803840256 804427264 805014336 805506432 805870976 806138304 806374336 806647040 807008256 807479040 808048960 808685312 809350912 810014336 810658432 811277248 811867648 812422912 812932416 813387776 813789184 814148416…
831785024 831743104 831690240 831626496 831539200 831411200 831228864 830989760 830704640 830394240 830082944 829795456 829555328 829387328 829322304 829395264 829632192 830032192 830542272 831065472 831493376 831768192 831905600 831976256 832067328 832248448 832562304 833011328 833566528 834174208 834782208 835353792 835876160 836356864 836811136 837248448 837668992 838063872 838424768 838747712…
824335488 824477824 824584448 824637696 824626624 824552640 824427008 824268160 824092864 823912256 823732096 823554240 823387520 823249408 823173696 823201472 823368960 823686208 824116032 824577088 824975296 825258944 825440704 825581824 825757312 826023808 826411968 826918464 827512000 828142848 828766400 829352128 829888320 830378176 830826176 831232768 831593792 831904192 832168000 832396096…
840826176 840836800 840822080 840763712 840642880 840447360 840181568 839861760 839516480 839173376 838852864 838567040 838324096 838136512 838027584 838031104 838179776 838484864 838912576 839381504 839792128 840081856 840254464 840365696 840491584 840696320 841019904 841467584 842013248 842609024 843206016 843768704 844282624 844751232 845183936 845587136 845957440 846286528 846567488 846800256…
836315136 836413696 836491840 836548608 836583488 836600064 836608192 836618880 836636480 836654208 836653440 836611456 836513664 836363200 836187264 836039296 835983808 836087296 836380480 836837312 837376832 837911744 838391104 838813184 839212800 839633024 840109504 840655872 841263104 841903808 842547008 843166208 843747328 844285248 844780672 845232192 845637376 845996160 846313216 846599360…
804777472 804848832 804919680 804979584 805014208 805013440 804982976 804941568 804907392 804887936 804872192 804834880 804750144 804609664 804433920 804276416 804214464 804331840 804674304 805218880 805871104 806520384 807099904 807603008 808070272 808556288 809107264 809741376 810447680 811190336 811928704 812630592 813282560 813886592 814452544 814986048 815486144 815948352 816371008 816757632…
878601984 878508352 878407680 878281344 878111360 877887744 877610240 877292480 876953024 876613760 876292480 876003520 875761728 875583296 875492096 875512512 875658752 875916800 876229888 876514048 876689536 876727936 876664256 876572672 876530048 876592256 876786880 877106048 877514496 877959232 878390592 878776384 879107456 879391616 879645376 879879936 880097984 880296000 880469056 880615360…
810777536 810575552 811142912 812354048 813955328 815667776 817253504 818572480 819563968 820222272 820563584 820612928 820400384 819969536 819398144 818809344 818354496 818201280 818457920 819103680 819982848 820888320 821672256 822289536 822784576 823236928 823728000 824307072 824983872 825733696 826514688 827282880 828008576 828680640 829294592 829849408 830339584 830757760 831100992 831373504…
819141248 819177984 819206528 819207808 819162816 819056256 818884608 818656000 818385472 818089536 817779072 817462208 817151040 816864768 816640960 816531584 816590912 816853504 817299136 817843328 818363008 818764288 819027072 819197440 819354112 819569152 819894656 820345216 820902080 821520512 822151360 822755328 823311232 823816960 824277888 824697600 825075392 825407744 825695552 825946624…
816932224 817160768 817342976 817465792 817528704 817546432 817546176 817551680 817570432 817586368 817566016 817472896 817289600 817028224 816736960 816496064 816397888 816522752 816894656 817452160 818067904 818621696 819060544 819405184 819720832 820075584 820517056 821057024 821674944 822325760 822965696 823565248 824116992 824629312 825112832 825568768 825989120 826360576 826676352 826942080…
722903488 723100608 723291712 723465088 723595328 723658496 723645504 723567552 723447424 723309952 723166208 723014912 722850816 722679680 722529984 722461952 722552640 722877888 723463296 724254144 725126976 725959104 726692032 727343872 727982912 728684800 729507776 730469696 731548160 732688128 733826688 734914624 735927232 736862464 737730176 738539264 739291072 739985024 740624000 741216832…
731890560 732019712 732135744 732220288 732242944 732176256 732007552 731746048 731420352 731067584 730719296 730397184 730117440 729897920 729772096 729790400 730006784 730454848 731109696 731876224 732619072 733236928 733710656 734097728 734491520 734980224 735624704 736441664 737404736 738454976 739528448 740574784 741568576 742507200 743396992 744240768 745033088 745764224 746428224 747029312…
747565440 747629184 747708672 747801536 747888896 747951104 747975296 747963968 747924928 747863168 747772672 747640128 747454208 747220672 746973440 746777792 746715840 746871552 747278144 747892992 748604480 749295168 749906816 750451904 750989312 751587456 752297728 753133632 754072512 755064192 756055232 757006592 757904192 758751616 759558784 760328960 761055296 761727616 762340608 762898688…
821795456 821979136 822106048 822167104 822150272 822051840 821879104 821651520 821396800 821140800 820900096 820678848 820476288 820295232 820153344 820085760 820135168 820339328 820700352 821171200 821668480 822120576 822504320 822845440 823197120 823610816 824119232 824725952 825404416 826108544 826790976 827417216 827972288 828458816 828885056 829257984 829581888 829861504 830107712 830339264…
871176128 871170880 871165312 871156864 871137536 871101120 871048256 870986816 870928704 870883712 870853632 870833664 870815040 870791872 870767680 870756608 870780864 870864704 871022656 871247168 871511104 871785792 872056256 872328768 872622208 872955072 873341952 873783936 874270400 874779904 875290624 875783936 876248064 876678848 877074816 877436544 877766720 878069632 878354432 878631488…
845574976 846038848 846439680 846752256 846961984 847070848 847101120 847089408 847071616 847070848 847083648 847090432 847064128 846989888 846877120 846766528 846721024 846816128 847101376 847567040 848140864 848729792 849270528 849748864 850190976 850636992 851122048 851658240 852235648 852824448 853391808 853913024 854380672 854800768 855185920 855546560 855885824 856204160 856502336 856784064…
834130304 834186752 834255616 834325184 834380288 834409280 834406912 834374848 834318080 834241728 834146112 834030592 833897344 833755712 833629248 833553920 833567872 833704704 833969408 834334272 834746240 835158144 835550464 835934080 836337664 836790208 837308480 837887872 838504512 839122560 839711168 840252096 840745216 841201792 841637056 842058944 842467584 842855296 843212800 843534912…
809839936 810041792 810258176 810465472 810635328 810745472 810785216 810758464 810677184 810555392 810403456 810228480 810040384 809855168 809705856 809638592 809702464 809936768 810343168 810877056 811460800 812022080 812526528 812982464 813424768 813893952 814421568 815016832 815669632 816354048 817042368 817714176 818359424 818978112 819571904 820140672 820678784 821179968 821639616 822056320…
802611648 802929600 803241984 803516096 803718272 803828352 803852480 803820032 803769280 803730880 803710400 803690944 803645952 803560128 803443072 803341312 803325824 803479680 803856064 804445888 805178624 805958464 806715328 807423552 808099904 808777536 809486720 810239424 811025024 811815936 812582528 813304960 813976256 814602368 815192192 815751040 816279616 816775040 817236544 817666496…
845193536 845216512 845214528 845182720 845114496 845009536 844872832 844716288 844550400 844381184 844205632 844015040 843804864 843580416 843364992 843199232 843130560 843198784 843414400 843742592 844117760 844476608 844787840 845058880 845322048 845614528 845963776 846377664 846843776 847335040 847822592 848284480 848710528 849100736 849458752 849787136 850086464 850357440 850604352 850835328…
813071616 813223360 813355968 813460928 813526336 813542784 813511040 813444160 813360128 813273152 813184512 813084416 812959808 812807616 812643712 812508288 812456128 812544832 812802560 813208640 813698880 814201792 814676160 815122432 815570816 816061952 816624384 817263040 817958464 818671808 819364416 820009792 820598592 821136768 821634112 822096000 822520192 822900928 823235392 823527040…
838600384 838519744 838492416 838495488 838489792 838437824 838320896 838145600 837936704 837719680 837510528 837310656 837114496 836921600 836749312 836632128 836612992 836728064 836975424 837308928 837652608 837940992 838153792 838318528 838488640 838716608 839040448 839464576 839962944 840486656 840986880 841430080 841808192 842134464 842433408 842725504 843017664 843305216 843576448 843820928…
846253312 846372352 846450944 846488320 846481728 846430848 846339520 846218880 846082944 845944320 845808000 845673984 845538112 845404160 845286912 845219264 845241792 845396864 845696384 846107584 846554816 846961920 847289728 847544256 847763392 847994752 848278336 848635008 849062976 849539968 850033792 850515776 850966400 851379904 851758784 852105536 852421056 852703872 852953216 853172352…
840776576 840859008 840928320 840971136 840977088 840940480 840864576 840758528 840634944 840500032 840354816 840196224 840021312 839836800 839665024 839544896 839524864 839653376 839947520 840375232 840859456 841319488 841712128 842039808 842335680 842641984 842992320 843399744 843857024 844340160 844820992 845277952 845702208 846096960 846469376 846824768 847161408 847474304 847757696 848010304…
761820224 762166144 762553472 762918784 763184064 763298368 763266816 763146880 763016576 762930816 762888320 762840128 762719680 762489024 762164608 761832000 761620032 761673600 762071744 762773504 763624960 764453056 765162496 765760576 766320896 766924416 767625856 768430720 769302720 770184832 771031936 771827520 772583744 773322432 774052864 774761344 775420864 776006784 776518080 776977536…
811207424 811405952 811573696 811698176 811764160 811768192 811727360 811674368 811642432 811647744 811676352 811687424 811632000 811478144 811224640 810915392 810633984 810493696 810593408 810963776 811547776 812235008 812927808 813576128 814184320 814785536 815414784 816089152 816802624 817525376 818222720 818866624 819446784 819968768 820446400 820892032 821311552 821706112 822076672 822427008…
835572160 835722176 835857344 835965376 836028608 836033472 835975744 835862528 835707072 835522944 835315008 835084608 834833984 834575808 834340608 834181504 834159168 834328768 834699264 835217152 835774976 836272832 836662912 836958336 837212736 837485760 837826624 838256704 838767808 839329856 839903552 840455808 840966464 841430080 841847744 842221632 842552576 842841728 843097088 843331072…
833711488 833909632 834070848 834201216 834304960 834388480 834460544 834528320 834593344 834643968 834657344 834607744 834476224 834264384 834000640 833743872 833572544 833574080 833804160 834251264 834834816 835448768 836017280 836518080 836973888 837423680 837905216 838435776 839010176 839606784 840198720 840766272 841301632 841807808 842289536 842747264 843176128 843567808 843918208 844230144…
9.96012e-09 9.96854e-09 9.97623e-09 9.98258e-09 9.9865e-09 9.98708e-09 9.9844e-09 9.97964e-09 9.97455e-09 9.97048e-09 9.96756e-09 9.96457e-09 9.95964e-09 9.95133e-09 9.93962e-09 9.92665e-09 9.91639e-09 9.91403e-09 9.9238e-09 9.94657e-09 9.97941e-09 1.0017e-08 1.00548e-08 1.00904e-08 1.01241e-08 1.01576e-08 1.01931e-08 1.02318e-08 1.02736e-08 1.03173e-08 1.03612e-08 1.04038e-08 1.04441e-08 1.04819…
1.25359e-08 1.25324e-08 1.25341e-08 1.25394e-08 1.25445e-08 1.25462e-08 1.25423e-08 1.25327e-08 1.25191e-08 1.25035e-08 1.24868e-08 1.24688e-08 1.2448e-08 1.24233e-08 1.2395e-08 1.23661e-08 1.23415e-08 1.23281e-08 1.23316e-08 1.23535e-08 1.239e-08 1.24344e-08 1.24804e-08 1.25245e-08 1.25665e-08 1.26082e-08 1.26514e-08 1.26971e-08 1.27444e-08 1.27915e-08 1.28361e-08 1.28769e-08 1.29137e-08 1.29474…
1.31798e-08 1.31789e-08 1.31765e-08 1.31719e-08 1.3164e-08 1.31518e-08 1.31355e-08 1.31168e-08 1.30983e-08 1.30822e-08 1.30694e-08 1.30591e-08 1.30498e-08 1.30401e-08 1.30301e-08 1.3022e-08 1.30192e-08 1.3026e-08 1.30445e-08 1.30734e-08 1.31073e-08 1.31407e-08 1.317e-08 1.31953e-08 1.32194e-08 1.32463e-08 1.3279e-08 1.33192e-08 1.33659e-08 1.34163e-08 1.34674e-08 1.35162e-08 1.35616e-08 1.36036e-…
835490752 835809472 836139520 836454784 836723712 836926528 837064960 837162304 837249152 837344960 837443072 837513856 837517248 837429056 837252864 837036864 836865152 836851904 837089088 837597952 838308608 839095360 839848320 840507136 841070464 841570112 842049344 842539904 843058240 843603008 844161472 844719040 845264896 845792640 846297856 846773376 847213056 847610880 847967936 848291712…
842898624 843008512 843109760 843196352 843251968 843263616 843229760 843165440 843091840 843026944 842971584 842914176 842835904 842728256 842602112 842495936 842466880 842577792 842863104 843302976 843823040 844337984 844795456 845190656 845555008 845931264 846355584 846841984 847381056 847945792 848505088 849035648 849527488 849983616 850410432 850811840 851186368 851529920 851841920 852126016…
848922368 848883008 848870336 848872192 848868160 848842240 848787072 848706496 848610560 848503296 848380224 848231040 848046848 847831104 847608640 847424064 847331456 847381760 847589248 847915712 848282880 848616320 848885248 849106688 849325568 849589184 849930496 850355008 850844032 851361024 851870976 852350912 852795968 853213248 853610816 853989952 854342208 854655616 854922560 855144320…
826519872 826575296 826625664 826664960 826676736 826642816 826553984 826415616 826244608 826058944 825869376 825676096 825475904 825271232 825082112 824950464 824932928 825086464 825432512 825931520 826492096 827017472 827460032 827827584 828164928 828521600 828935488 829415424 829947456 830498048 831035776 831541440 832013952 832464192 832903616 833333376 833744704 834122176 834454528 834740608…
805079360 805049216 804998272 804922048 804808192 804649216 804448704 804220416 803985280 803758464 803543872 803335424 803128256 802926720 802757632 802669888 802718976 802949504 803357440 803874048 804386752 804803904 805102400 805323584 805542656 805831936 806241280 806783296 807434752 808144512 808856576 809526080 810129472 810664320 811137984 811559424 811933952 812267392 812569728 812856320…
791218688 791384064 791519168 791610048 791644224 791618880 791545856 791447296 791347072 791255808 791168000 791063936 790925312 790749312 790561536 790417344 790390400 790556416 790947968 791525952 792185664 792816320 793361024 793828224 794270080 794746112 795302144 795950592 796674048 797429824 798173696 798873728 799518336 800113152 800668544 801191104 801678784 802125568 802528896 802894208…
850375680 850228096 850059904 849869568 849651776 849401856 849116672 848798464 848454208 848093504 847726912 847369408 847040832 846768256 846587840 846541504 846660032 846944064 847341440 847756352 848083584 848270720 848337408 848356480 848410624 848562112 848843072 849247744 849740608 850267136 850777728 851242240 851652928 852019904 852356288 852669504 852956416 853209088 853423680 853604416…
815315904 815481920 815651840 815812096 815938816 816011584 816020288 815969472 815873728 815746944 815593408 815410240 815195648 814955648 814720000 814542592 814492480 814637888 815004608 815549376 816166016 816745024 817230592 817630912 817997888 818390976 818857408 819412864 820041856 820704960 821357184 821965504 822516352 823014208 823471936 823899072 824299008 824669184 825007936 825317888…
818234432 818405632 818554176 818671360 818744000 818765184 818743744 818700032 818657856 818630656 818611008 818575744 818498752 818366784 818193408 818025216 817932992 817998400 818273600 818744512 819327168 819916672 820444288 820899584 821318080 821748736 822236032 822798208 823427136 824092224 824757312 825393088 825984832 826531648 827036608 827499392 827915904 828279488 828590336 828857408…
759546432 759881536 760270080 760658112 760979008 761180864 761239552 761166336 760997376 760775232 760528128 760267264 759993280 759709952 759444800 759256768 759223936 759429376 759910208 760621952 761447296 762258880 762985792 763630144 764245760 764897408 765635904 766475840 767395328 768346048 769275456 770145472 770940608 771665088 772330944 772947264 773517760 774044416 774534528 775000128…
808939648 809104896 809272512 809428736 809549376 809613888 809612864 809555072 809459520 809346752 809227456 809100160 808957952 808799808 808641728 808521472 808491648 808604736 808885888 809312576 809821824 810342912 810834368 811293312 811747840 812233216 812776896 813382336 814030912 814686400 815314432 815892608 816417152 816897280 817347008 817775296 818181312 818559040 818905088 819218432…
774030784 774238080 774442752 774642560 774820480 774957504 775044928 775086144 775092928 775074112 775027328 774939712 774799040 774604928 774383616 774190912 774099776 774186944 774491712 774992448 775611520 776259136 776877952 777460224 778037952 778654336 779343808 780114368 780945792 781797696 782629376 783412544 784138496 784812992 785444544 786036544 786584704 787081536 787526400 787927616…
774530560 774673984 774835648 774996736 775126400 775195008 775189568 775116928 774995904 774843392 774665664 774457856 774214016 773939648 773663808 773445056 773355392 773463360 773791808 774295424 774871680 775420544 775895168 776312000 776729728 777209856 777797312 778500608 779292352 780119552 780928704 781683584 782373120 783007872 783604352 784174208 784718784 785231168 785706048 786142528…
825484096 825466560 825433152 825384832 825312896 825213568 825095168 824977472 824884288 824827712 824799808 824776768 824728640 824640896 824522688 824414912 824378880 824483776 824766528 825207424 825729536 826242880 826693824 827076352 827423296 827778944 828180032 828642048 829156800 829700224 830246208 830776128 831285120 831775360 832249728 832702464 833122112 833495808 833818944 834098048…
790260416 790279232 790303552 790326528 790332992 790308992 790244416 790139008 789997504 789821696 789610688 789363648 789087936 788805824 788562176 788420736 788444992 788676544 789096064 789617536 790118336 790507328 790768448 790954240 791148736 791430336 791849536 792414400 793094912 793832640 794570176 795265984 795903808 796487424 797027520 797529920 797992576 798409984 798782656 799118336…
808350144 808619456 808912704 809220672 809526592 809815232 810080768 810324608 810545280 810727680 810845504 810866112 810766592 810549312 810250624 809946496 809740352 809748096 810048448 810632192 811395776 812196608 812933248 813573824 814145152 814698816 815282368 815918912 816606080 817318144 818024576 818701760 819339392 819938112 820501248 821025984 821503808 821926976 822292928 822611008…
834995136 835244416 835417792 835510528 835523392 835464960 835353536 835214208 835068864 834930176 834794624 834650048 834484224 834298560 834116352 833986304 833973632 834141248 834514112 835051136 835650816 836207680 836664704 837025600 837336256 837651392 838016960 838454208 838958592 839505280 840063936 840610048 841130240 841623488 842091392 842531584 842937472 843300032 843614720 843885056…
825235776 825151488 825064320 824967296 824841280 824672704 824456704 824201024 823922112 823635008 823347776 823063872 822789376 822539392 822346880 822263360 822338816 822604800 823038336 823553472 824031168 824386752 824610112 824756032 824906944 825134144 825483392 825961216 826539136 827164864 827786176 828365952 828890560 829364928 829799424 830198912 830560896 830877504 831146688 831374848…
847496384 847603776 847670592 847713984 847741120 847752000 847741952 847706048 847642688 847555136 847451200 847343424 847251200 847196992 847209344 847321408 847557632 847921472 848381120 848872960 849324672 849696576 849994816 850261632 850548736 850896128 851324224 851830464 852392704 852978944 853559488 854114368 854635136 855120384 855569664 855979328 856345152 856666880 856952896 857218496…
873607808 873140672 873278336 873812864 874465792 874975104 875154624 874952192 874439104 873781568 873165568 872756416 872660224 872919680 873536384 874476032 875671680 876992704 878245056 879225088 879785472 879912192 879708032 879335232 878943552 878637248 878475392 878464256 878570816 878736064 878901312 879027712 879108800 879169792 879255680 879415680 879683328 880074688 880585920 881195328…
882847488 882783808 882705984 882606208 882477184 882319360 882139136 881950016 881765120 881589760 881422528 881256640 881088256 880923072 880782464 880699584 880714048 880853248 881111936 881444800 881779712 882058560 882267136 882430976 882597120 882810048 883100352 883473216 883912000 884381504 884843648 885270848 885650624 885985408 886286784 886564928 886826112 887071808 887301952 887516416…
8.26958e-09 8.28445e-09 8.29911e-09 8.31142e-09 8.31945e-09 8.32212e-09 8.3197e-09 8.31365e-09 8.30609e-09 8.29885e-09 8.29268e-09 8.28729e-09 8.28176e-09 8.27543e-09 8.26859e-09 8.26293e-09 8.26114e-09 8.26641e-09 8.28074e-09 8.30356e-09 8.33177e-09 8.36136e-09 8.38965e-09 8.41604e-09 8.44174e-09 8.46858e-09 8.49809e-09 8.53076e-09 8.56591e-09 8.60205e-09 8.63761e-09 8.67159e-09 8.70391e-09 8.73…
1.4468e-09 1.44616e-09 1.4458e-09 1.44563e-09 1.44544e-09 1.44498e-09 1.44416e-09 1.44304e-09 1.44181e-09 1.44062e-09 1.43948e-09 1.43826e-09 1.4367e-09 1.43466e-09 1.43216e-09 1.42951e-09 1.42727e-09 1.42616e-09 1.42679e-09 1.42927e-09 1.43316e-09 1.43768e-09 1.44217e-09 1.44633e-09 1.4502e-09 1.45405e-09 1.45818e-09 1.46273e-09 1.46772e-09 1.473e-09 1.47838e-09 1.4837e-09 1.48888e-09 1.49391e-0…
1.10202e-08 1.10177e-08 1.1019e-08 1.10243e-08 1.10319e-08 1.10389e-08 1.10424e-08 1.10408e-08 1.10337e-08 1.10219e-08 1.10066e-08 1.09893e-08 1.0971e-08 1.09534e-08 1.09386e-08 1.09302e-08 1.0932e-08 1.09476e-08 1.09774e-08 1.10177e-08 1.1061e-08 1.10997e-08 1.11303e-08 1.11531e-08 1.11716e-08 1.11905e-08 1.12136e-08 1.12432e-08 1.12795e-08 1.13208e-08 1.13649e-08 1.14092e-08 1.14524e-08 1.14935…
1.20257e-08 1.20344e-08 1.20445e-08 1.2054e-08 1.20609e-08 1.20643e-08 1.20645e-08 1.2063e-08 1.20616e-08 1.20611e-08 1.20607e-08 1.20584e-08 1.20518e-08 1.20397e-08 1.20228e-08 1.20042e-08 1.19893e-08 1.19845e-08 1.19951e-08 1.20218e-08 1.20607e-08 1.21048e-08 1.21488e-08 1.219e-08 1.22292e-08 1.22688e-08 1.2311e-08 1.23567e-08 1.24056e-08 1.24558e-08 1.25051e-08 1.25521e-08 1.25964e-08 1.26386e…
1.09277e-08 1.09301e-08 1.09314e-08 1.09305e-08 1.09262e-08 1.0918e-08 1.09058e-08 1.08906e-08 1.08738e-08 1.08566e-08 1.08394e-08 1.08221e-08 1.08044e-08 1.07867e-08 1.07706e-08 1.07589e-08 1.07547e-08 1.0761e-08 1.07779e-08 1.08025e-08 1.08292e-08 1.08532e-08 1.08728e-08 1.08897e-08 1.09074e-08 1.09296e-08 1.09586e-08 1.09946e-08 1.10359e-08 1.10796e-08 1.11224e-08 1.11624e-08 1.11989e-08 1.123…
1.13227e-08 1.13224e-08 1.13226e-08 1.1323e-08 1.13229e-08 1.13209e-08 1.13161e-08 1.13086e-08 1.1299e-08 1.12885e-08 1.12778e-08 1.12668e-08 1.12557e-08 1.12447e-08 1.12352e-08 1.12297e-08 1.12314e-08 1.12433e-08 1.12663e-08 1.12981e-08 1.13334e-08 1.13674e-08 1.13979e-08 1.14259e-08 1.14548e-08 1.14877e-08 1.1527e-08 1.15728e-08 1.16236e-08 1.16761e-08 1.17271e-08 1.17744e-08 1.18171e-08 1.1855…
