# Supplementary material for: Comparison of Attenuated Total Reflectance Mid-Infrared, Near Infrared, and 1H-Nuclear Magnetic Resonance Spectroscopies for the Determination of Coffee's Geographical Origin
Source: Int J Anal Chem. 2017 Nov 1;2017:7210463. doi: 10.1155/2017/7210463 (PMC5672123; doi:10.1155/2017/7210463)
Supplement: Supplementary file 1 — The supplementary material contains the original spectra and the necessary R scripts, as a zip file, to reproduce the results presented in this manuscript. [file 7210463.f1.zip › coffee-profiler-master/data/NIRSamples.csv]

AC1160
AC1160
AC1160
AC1161
AC1161
AC1161
AC1162
AC1162
AC1162
AC1163
AC1163
AC1163
AC1164
AC1164
AC1164
AC1168
AC1168
AC1168
AC1169
AC1169
AC1169
AC1170
AC1170
AC1170
AC1171
AC1171
AC1171
AC1198
AC1198
AC1198
AC1199
AC1199
AC1199
AC1200
AC1200
AC1200
AC1201
AC1201
AC1201
AC1204
AC1204
AC1204
AC1205
AC1205
AC1205
AC1206
AC1206
AC1206
AC1207
AC1207
AC1207
AC1208
AC1208
AC1208
AC1211
AC1211
AC1211
AC1212
AC1212
AC1212
AC1213
AC1213
AC1213
AC1216
AC1216
AC1216
AC1217
AC1217
AC1217
AC1227
AC1227
AC1227
AC1229
AC1229
AC1234
AC1234
AC1234
AC1241
AC1241
AC1241
AC1242
AC1242
AC1242
AC1243
AC1243
AC1243
AC1246
AC1246
AC1246
AC1247
AC1247
AC1247
AC1248
AC1248
AC1248
AC1250
AC1250
AC1250
AC1251
AC1251
AC1251
AC1252
AC1252
AC1252
AC1256
AC1256
AC1256
AC1258
AC1258
AC1258
AC1260
AC1260
AC1260
AC1290
AC1290
AC1290
AC1291
AC1291
AC1291
AC1294
AC1294
AC1294
AC1295
AC1295
AC1295
AC1296
AC1296
AC1296
AC1297
AC1297
AC1297
AC1302
AC1302
AC1302
AC1309
AC1309
AC1309
AC1315
AC1315
AC1315
AC1316
AC1316
AC1316
AC1317
AC1317
AC1317
AC1318
AC1318
AC1318
AC1319
AC1319
AC1319
AC1320
AC1320
AC1320
AC1321
AC1321
AC1321
AC1322
AC1322
AC1322
AC1325
AC1325
AC1325
AC1326
AC1326
AC1326
AC1327
AC1327
AC1327
AC1328
AC1328
AC1328
AC1332
AC1332
AC1332
AC1334
AC1334
AC1334
AC1336
AC1336
AC1336
AC1337
AC1337
AC1337
AC1338
AC1338
AC1338
AC1339
AC1339
AC1339
AC1342
AC1342
AC1343
AC1345
AC1345
AC1345
AC1346
AC1346
AC1346
AC1347
AC1347
AC1347
AC1348
AC1348
AC1348
AC1349
AC1349
AC1349
AC1353
AC1353
AC1353
AC1354
AC1354
AC1354
AC1355
AC1355
AC1355
AC1356
AC1356
AC1356
AC1358
AC1358
AC1358
AC1375
AC1375
AC1375
AC1376
AC1376
AC1376
AC1377
AC1377
AC1377
AC1379
AC1379
AC1379
AC1380
AC1380
AC1380
AC1382
AC1382
AC1382
AC1387
AC1387
AC1387
AC1388
AC1388
AC1388
AC1389
AC1389
AC1389
AC1394
AC1394
AC1394
AC1395
AC1395
AC1395
AC1403
AC1403
AC1403
AC1404
AC1404
AC1404
AC1405
AC1405
AC1405
AC1406
AC1406
AC1406
AC1407
AC1407
AC1407
AC1409
AC1409
AC1409
AC1412
AC1412
AC1412
AC1413
AC1413
AC1413
AC1414
AC1414
AC1414
AC1420
AC1420
AC1420
AC1421
AC1421
AC1421
AC1424
AC1424
AC1424
AC1427
AC1427
AC1427
AC1428
AC1428
AC1428
AC1431
AC1431
AC1431
AC1432
AC1432
AC1432
AC1436
AC1436
AC1436
AC1437
AC1437
AC1437
AC1441
AC1441
AC1441
AC1445
AC1445
AC1445
