# Supplementary material for: Comparison of Attenuated Total Reflectance Mid-Infrared, Near Infrared, and 1H-Nuclear Magnetic Resonance Spectroscopies for the Determination of Coffee's Geographical Origin
Source: Int J Anal Chem. 2017 Nov 1;2017:7210463. doi: 10.1155/2017/7210463 (PMC5672123; doi:10.1155/2017/7210463)
Supplement: Supplementary file 1 — The supplementary material contains the original spectra and the necessary R scripts, as a zip file, to reproduce the results presented in this manuscript. [file 7210463.f1.zip › coffee-profiler-master/data/NIRscale.csv]

4000 4004 4008 4012 4016 4020 4024 4028 4032 4036 4040 4044 4048 4052 4056 4060 4064 4068 4072 4076 4080 4084 4088 4092 4096 4100 4104 4108 4112 4116 4120 4124 4128 4132 4136 4140 4144 4148 4152 4156 4160 4164 4168 4172 4176 4180 4184 4188 4192 4196 4200 4204 4208 4212 4216 4220 4224 4228 4232 4236 4240 4244 4248 4252 4256 4260 4264 4268 4272 4276 4280 4284 4288 4292 4296 4300 4304 4308 4312 4316…
