# Supplementary material for: Comparison of Attenuated Total Reflectance Mid-Infrared, Near Infrared, and 1H-Nuclear Magnetic Resonance Spectroscopies for the Determination of Coffee's Geographical Origin
Source: Int J Anal Chem. 2017 Nov 1;2017:7210463. doi: 10.1155/2017/7210463 (PMC5672123; doi:10.1155/2017/7210463)
Supplement: Supplementary file 1 — The supplementary material contains the original spectra and the necessary R scripts, as a zip file, to reproduce the results presented in this manuscript. [file 7210463.f1.zip › coffee-profiler-master/data/NIRspectra.csv]

715547332 714260978 713944336 714658282 716375618 719015079 722498614 726753997 731673078 737114611 742974730 749240854 755961411 763174588 770882831 779083974 787790051 796989836 806600027 816473394 826452775 836398350 846170947 855632789 864692112 873332595 881583917 889472003 896997919 904142222 910876178 917177346 923041831 928483346 933529988 938224693 942605969 946663655 950317807 953460243…
684420448 683002555 682564664 683129828 684678218 687198848 690652570 694915554 699812321 705215341 711087634 717430188 724225351 731446460 739090677 747173275 755701201 764666828 774045551 783770557 793715875 803725551 813661114 823417216 832908211 842060076 850815568 859140616 867029647 874506289 881605318 888339117 894680507 900583387 906021485 911009145 915589458 919799042 923630707 927024516…
686287169 684762478 684184250 684658269 686187517 688707117 692125202 696336053 701223878 706684557 712651192 719089092 725963653 733228409 740859113 748890229 757392192 766399413 775863667 785670078 795671991 805699812 815567417 825116738 834274913 843058311 851513721 859657755 867465787 874900392 881938922 888576704 894810546 900626446 906013508 910991518 915607961 919889721 923799498 927250678…
693772523 692180185 691544083 691944550 693385530 695834282 699246540 703538563 708561399 714146141 720183710 726644558 733526460 740811888 748486520 756578893 765158080 774278763 783917202 793951063 804195566 814457101 824566758 834401044 843900168 853055621 861857728 870261903 878221296 885738221 892857921 899613569 905995103 911970494 917519312 922639488 927332577 931590106 935388645 938692616…
677204643 675600890 674930306 675310788 676787613 679315611 682799007 687128887 692180811 697813868 703910248 710420996 717359764 724748038 732576033 740822274 749497450 758640878 768253785 778239158 788417592 798598305 808631061 818414411 827892767 837053367 845900940 854418629 862559105 870275970 877552496 884392847 890790800 896716282 902141855 907087749 911630222 915842042 919712350 923134731…
866159176 865638118 866181416 867815272 870516227 874215400 878791396 884073464 889881549 896083108 902609205 909427164 916531677 923973258 931863500 940317816 949378718 958978693 968954093 979090160 989170563 999004285 1008431575 1017343744 1025716962 1033604355 1041070282 1048138869 1054812990 1061116675 1067086189 1072717789 1077943801 1082676221 1086883420 1090629121 1094031762 1097173414 110…
709765216 708347769 707821735 708179702 709440216 711669470 714911845 719110763 724107073 729708185 735763598 742200976 749011675 756207869 763800717 771819923 780325863 789364533 798900215 808802998 818899860 829023468 839018666 848742348 858097079 867067081 875694373 884003386 891958932 899505930 906630182 913354052 919678412 925558840 930951605 935867867 940368588 944508394 948286098 951642516…
711071282 709672337 709156187 709569174 710967446 713375084 716745871 720970091 725908991 731426387 737412316 743803597 750589704 757791155 765430153 773528002 782120571 791241065 800859642 810846102 821009750 831174318 841209611 851014283 860501754 869605090 878275214 886473752 894188243 901458186 908361616 914952974 921213679 927070703 932459367 937363997 941812240 945848246 949503798 952770574…
793937366 793300191 793605685 794932583 797299841 800638914 804807587 809630808 814938354 820596903 826541230 832783850 839382691 846392669 853850663 861794302 870258204 879216618 888525114 897940596 907217253 916184388 924739161 932801942 940317819 947297006 953818006 959971452 965803836 971312002 976473155 981268912 985691309 989745238 993451871 996838608 999912945 1002648184 1005003105 1006952…
730576362 729048781 728464066 728864820 730266315 732659535 735999581 740190417 745090870 750558657 756503708 762899829 769749422 777050872 784802898 793019364 801713483 810860254 820385440 830199371 840228682 850391001 860537439 870454037 879952624 888960029 897509268 905658652 913436015 920839358 927847667 934422018 940528658 946179981 951432942 956331462 960866265 964997776 968689050 971900996…
725974076 724443147 723855504 724240847 725599670 727909342 731122994 735169830 739963244 745416743 751450548 757980545 764918757 772211469 779880858 788011431 796681569 805899258 815586375 825606635 835807318 846043875 856173312 866040898 875502261 884477461 892978553 901071320 908806127 916183937 923175012 929751912 935903201 941630281 946939563 951833929 956310629 960369164 964011773 967226017…
1122173324 1121891275 1122580182 1124335676 1127182866 1131038106 1135740021 1141106712 1146963257 1153148161 1159538946 1166095541 1172876218 1180002357 1187602819 1195773203 1204541804 1213828998 1223434177 1233091001 1242559684 1251674660 1260321875 1268405878 1275859300 1282673301 1288905111 1294657408 1300043206 1305140826 1309956430 1314430451 1318493454 1322122205 1325349141 1328234402 133…
751572787 750044531 749468737 749881584 751284278 753679450 757063897 761376952 766490947 772269308 778613787 785452118 792715354 800354835 808373294 816824732 825779791 835276028 845272385 855636275 866179117 876709910 887065998 897125428 906820117 916132059 925059432 933591926 941724590 949469067 956823636 963743116 970159871 976030253 981356974 986190325 990619775 994731264 998538283 100196167…
970672773 970551194 971582652 973688629 976787290 980809957 985673658 991251340 997378280 1003900233 1010727055 1017854664 1025346060 1033281619 1041710121 1050641840 1060074974 1069988324 1080281572 1090743949 1101107251 1111122287 1120591667 1129388579 1137493405 1144995716 1152026131 1158681177 1165002147 1170982161 1176567217 1181676033 1186253387 1190309755 1193908720 1197128657 1200034975 1…
755291243 753761919 753116592 753437866 754784364 757161081 760519108 764769372 769794450 775468699 781689645 788397134 795561585 803157879 811160291 819567282 828420120 837774168 847635247 857920518 868472389 879090469 889553773 899660522 909295629 918461272 927220813 935614611 943638466 951279342 958530502 965360086 971689493 977433380 982575792 987202122 991441437 995371546 998984135 100223154…
708951752 706967498 705870513 705809766 706866446 709044130 712285037 716462100 721375688 726815113 732654008 738881900 745540773 752643364 760162111 768088173 776476355 785405161 794880547 804784307 814916635 825071242 835067174 844754834 854050032 862966185 871571273 879893588 887885292 895476028 902627756 909323704 915534108 921221118 926373591 931028672 935262349 939147900 942695276 945825283…
711091240 709030223 707935022 707899560 708959325 711121562 714349659 718523603 723442337 728897811 734769667 741050742 747774153 754926415 762455819 770361211 778729936 787656457 797130422 807012675 817098221 827183781 837100339 846729753 856013043 864934106 873487801 881666747 889471122 896908238 903969818 910617529 916797049 922461634 927590052 932207504 936394798 940245825 943790166 946966494…
704396324 702409912 701404550 701505783 702743207 705052806 708305909 712352016 717062317 722349767 728155433 734427359 741121338 748217063 755726633 763689764 772156555 781151928 790635214 800491747 810565925 820698295 830737714 840544824 850007439 859055502 867657370 875804556 883503103 890775130 897655875 904170669 910302255 915986145 921153718 925790027 929952584 933731928 937183771 940289733…
648045584 645838158 644595026 644465152 645486713 647581500 650593059 654347546 658703377 663575303 668934866 674784086 681108103 687848276 694937853 702372552 710230193 718600056 727488250 736792637 746352695 755999302 765562385 774875264 783812018 792322880 800420786 808136726 815491327 822490284 829122864 835358845 841150722 846443977 851203379 855451558 859275362 862764472 865935309 868734186…
645416416 643511054 642493201 642457526 643437044 645403452 648284684 651970305 656318313 661199243 666546730 672346221 678575862 685187631 692154673 699513456 707343588 715706266 724588422 733879398 743391722 752918132 762288986 771396321 780184209 788625559 796701363 804390476 811671910 818533727 824977364 831007891 836614300 841765231 846439844 850666314 854513537 858031561 861204501 863970424…
650128030 648324743 647304675 647199956 648128610 650113026 653055505 656789278 661148890 666015616 671328407 677065982 683219127 689778086 696739851 704119785 711953571 720280957 729109379 738376745 747941881 757606839 767157016 776412748 785275152 793725108 801768834 809393049 816581411 823354048 829760255 835824967 841511354 846740468 851452178 855658309 859440177 862883612 866008329 868765701…
642924700 640972253 639866881 639753744 640748092 642853373 645949550 649845427 654342144 659288827 664615987 670315167 676379490 682781076 689518684 696663683 704324002 712552253 721294817 730421749 739781278 749215572 758551173 767620936 776321312 784641870 792628016 800316538 807702541 814744473 821379946 827541641 833177690 838271088 842849307 846982686 850765165 854269500 857498182 860377075…
628392723 626445887 625386854 625298085 626234717 628203303 631142178 634926757 639388414 644352206 649696733 655388351 661446323 667886338 674722303 682008577 689830919 698228536 707134813 716400894 725860564 735361732 744756571 753900380 762685028 771074351 779097923 786801188 794190116 801213293 807794765 813886073 819486243 824616312 829293324 833544909 837434717 841035941 844359402 847323632…
641211669 639323470 638339919 638368947 639458646 641596466 644702872 648623646 653159519 658142579 663499312 669238087 675381474 681923932 688855489 696207348 704050126 712430773 721304447 730528539 739921708 749322876 758603054 767658327 776422518 784873948 793002442 800773200 808138373 815072344 821575765 827650410 833281963 838442607 843111253 847309925 851122998 854652940 857934899 860900182…
672362212 670426295 669389046 669349448 670349531 672377262 675368400 679205940 683739365 688830658 694390046 700367679 706725489 713440699 720542835 728127512 736303751 745102492 754423549 764071898 773849168 783609263 793236077 802604722 811600552 820171845 828336701 836131970 843565962 850615468 857248324 863437705 869156807 874371362 879062061 883272815 887115660 890683687 893949550 896781232…
1054053370 1053102753 1053252776 1054532438 1056945637 1060434960 1064836733 1069901194 1075366052 1081033894 1086830300 1092823177 1099171684 1106026432 1113469228 1121529890 1130207189 1139431946 1149025633 1158732609 1168301256 1177530695 1186267453 1194405835 1201911940 1208827543 1215226648 1221165181 1226674446 1231784052 1236519136 1240866373 1244767989 1248175255 1251108009 1253652520 125…
809652071 808542927 808540206 809685181 811948357 815221809 819325917 824056783 829244542 834778820 840604103 846715375 853154504 859991031 867302259 875169999 883660672 892757955 902304108 912031635 921659805 930953795 939725808 947853937 955335139 962283723 968834388 975042641 980883423 986324078 991371103 996044678 1000328694 1004169121 1007534052 1010469743 1013080654 1015445547 1017555245 10…
546409599 544656126 543735969 543742111 544719721 546664598 549496474 553066073 557215913 561838279 566880349 572312707 578105836 584237839 590723600 597628190 605031546 612961599 621353408 630065149 638927736 647789352 656533220 665068416 673315883 681215089 688742483 695906822 702717972 709168040 715243624 720939921 726252234 731161985 735642062 739678339 743286043 746503956 749366889 751880839…
585906470 584082985 583078778 582980658 583857521 585729137 588529668 592109221 596292296 600957365 606068062 611629979 617628769 624022017 630785946 637953054 645593809 653755793 662409638 671441549 680688873 689977836 699139938 708030183 716560866 724711317 732487664 739882162 746884261 753509303 759781301 765684829 771155285 776124822 780573898 784546309 788127731 791401176 794397334 797076749…
856669951 856268966 856916001 858628043 861342003 864926385 869232899 874133265 879501309 885189569 891068310 897102023 903367402 909984719 917052256 924650516 932846777 941619891 950780508 960016570 969029525 977606610 985593903 992880024 999436281 1005334114 1010696766 1015641365 1020254977 1024586175 1028637105 1032368070 1035719156 1038642636 1041138046 1043265632 1045113085 1046734171 104811…
642748643 640832159 639818698 639805832 640806915 642785357 645683173 649398267 653761208 658586037 663767195 669310881 675259611 681609492 688330157 695450861 703077819 711299129 720085222 729293766 738748778 748287241 757744488 766946312 775749044 784080209 791929309 799312593 806259836 812818725 819039865 824938438 830468431 835540480 840078074 844073210 847596153 850746844 853586400 856106577…
651400910 649528036 648509558 648467786 649454627 651429669 654298652 657951949 662268898 667132539 672476333 678298604 684601164 691327714 698399571 705814545 713678049 722112030 731129068 740590080 750268936 759949358 769474885 778742510 787681506 796241202 804379693 812057956 819259799 826020963 832412203 838466287 844124624 849277529 853866278 857940466 861617051 864992269 868086633 870851151…
652798045 650754536 649612213 649501650 650469982 652477664 655429650 659211567 663691344 668709792 674118735 679850377 685927001 692387718 699235322 706483073 714220934 722569127 731540926 740974539 750610501 760213916 769619925 778712236 787416172 795720314 803671293 811320885 818674774 825690620 832309188 838472666 844124116 849219105 853756562 857795779 861433096 864748314 867755099 870397717…
703619230 701830906 700986134 701165796 702428732 704781475 708126069 712257620 716936440 721976331 727285734 732868228 738810170 745241933 752267380 759913250 768135376 776844301 785912851 795189055 804526119 813787030 822820461 831474997 839662604 847383593 854674909 861561582 868066763 874224021 880045062 885496773 890537993 895166326 899408810 903279429 906767863 909865156 912581766 914937462…
667136014 665144210 664072782 664020028 665013194 667000904 669883762 673543679 677861915 682744308 688137994 694011827 700326287 707041516 714155233 721718029 729800573 738431138 747544987 756989610 766584425 776168994 785599101 794744411 803531834 811967133 820071120 827807061 835105227 841944775 848372951 854442202 860148133 865427126 870206506 874468591 878275294 881718763 884837992 887589397…
858199333 857232566 857240105 858308349 860462622 863625794 867627893 872262510 877344346 882743580 888405426 894354985 900671290 907439990 914726335 922583005 931047418 940086356 949528646 959077249 968418969 977336561 985732040 993582870 1000905952 1007744006 1014145444 1020145171 1025770942 1031054280 1036012038 1040619621 1044821395 1048575295 1051890350 1054833474 1057502212 1059964877 10621…
630961171 629010299 628001595 627995805 628981298 630910494 633733909 637383634 641733721 646617628 651904760 657545070 663534898 669870738 676564739 683689665 691364972 699670186 708569178 717917194 727523112 737188262 746705188 755877766 764590365 772850121 780726300 788243575 795360039 802048558 808354754 814341016 819989723 825194044 829847699 833931583 837520309 840724496 843624143 846230919…
623032340 621000017 619807499 619592833 620440999 622346387 625213717 628899410 633260842 638181893 643573605 649369169 655524007 662019615 668872405 676144317 683930533 692302168 701234062 710586507 720160754 729764635 739230746 748414793 757219945 765616724 773609329 781187425 788336427 795081942 801478349 807536120 813181806 818305848 822847102 826836002 830372928 833566813 836471976 839061413…
623091247 621133021 620086230 620012555 620928590 622824157 625647387 629285921 633582138 638382745 643587924 649164201 655117513 661461743 668219272 675443228 683212913 691578646 700496164 709814706 719329054 728837939 738163643 747159112 755737496 763890139 771647035 779016115 785973509 792501819 798612379 804326265 809645746 814547898 819006683 823027539 826656361 829937427 832858458 835354221…
588764361 586894044 585853723 585785643 586751696 588721290 591581283 595168262 599326634 603961482 609044240 614577891 620563039 626985519 633824014 641075878 648780125 656992643 665708720 674803307 684057969 693255305 702258566 711020983 719536655 727784978 735714556 743271115 750429675 757191848 763557529 769510791 775031107 780104195 784721420 788887810 792638453 796024949 799065911 801724817…
573155628 571442981 570567592 570591162 571564564 573489904 576293925 579848628 584017356 588687842 593780800 599249358 605080157 611290199 617915129 624996082 632568004 640641551 649179906 658089174 667231280 676442477 685546630 694382323 702850649 710939738 718684508 726096644 733142729 739786799 746029682 751888382 757345944 762345896 766850246 770896712 774581653 777974332 781048613 783707397…
604324926 602412486 601329169 601198861 602111123 604056379 606922378 610554621 614810446 619578159 624787575 630418221 636479327 642969292 649866311 657164971 664901184 673116872 681799340 690861094 700162511 709532503 718782113 727746148 736341664 744576001 752483384 760061793 767278173 774111916 780560068 786598865 792170361 797225470 801768858 805853204 809546056 812908399 815971835 818705942…
928811604 928287655 928924923 930716993 933608265 937491388 942187478 947462637 953085195 958887035 964796605 970838951 977110327 983737702 990842900 998522576 1006823599 1015694909 1024951319 1034307733 1043472396 1052215410 1060370108 1067819234 1074515738 1080507139 1085914400 1090873403 1095479105 1099757775 1103674118 1107165588 1110186083 1112747639 1114947128 1116942432 1118860691 11207003…
654148795 652326800 651292610 651133948 651924044 653700866 656443558 660050320 664356479 669207348 674525835 680305759 686544998 693203187 700235458 707655479 715540981 723962500 732905110 742252878 751827784 761431490 770875072 780016223 788789876 797189135 805209534 812829610 820047422 826898046 833401032 839500151 845083484 850073144 854493771 858459177 862096283 865468464 868550500 871267117…
787934402 786297835 785715782 786247604 787845836 790396004 793761851 797803111 802372902 807333144 812597804 818163403 824085670 830420131 837190469 844412624 852124429 860358097 869070469 878109487 887254544 896282797 905005646 913284468 921053892 928329763 935168056 941606289 947650454 953306547 958593741 963513580 968028040 972097972 975748971 979081525 982200168 985128861 987788764 990044361…
672441530 670639608 669770634 669883003 670983305 673036714 675955964 679596100 683780045 688366350 693314384 698677673 704524516 710870336 717688357 724965437 732722400 740971305 749655222 758629932 767701888 776685625 785438511 793868588 801932879 809626795 816960696 823943594 830589844 836923925 842954308 848638657 853889982 858631944 862856120 866629021 870042572 873151365 875945553 878369800…
627490711 625624987 624648688 624612960 625526926 627392439 630181897 633784118 638005145 642661001 647683598 653129076 659081014 665555500 672502238 679879971 687708150 696033480 704845606 714030314 723405049 732790469 742047786 751076512 759810199 768214336 776268319 783946785 791224236 798085189 804514209 810481876 815952394 820905402 825353245 829347696 832968023 836283857 839314272 842019336…
633644144 631802267 630799913 630776868 631824006 633923564 636955076 640742756 645104902 649902699 655081226 660665083 666696148 673172300 680058483 687355243 695131313 703465752 712353961 721669452 731202381 740724200 750036826 759004815 767568566 775723490 783477872 790831275 797784542 804345794 810512161 816254344 821528822 826304738 830586265 834425521 837910832 841114536 844035818 846608053…
644123088 642070713 640899864 640759895 641709863 643715864 646687936 650510280 655048445 660158637 665722124 671683278 678044843 684819998 692002912 699596029 707645922 716219419 725328697 734876453 744666761 754468445 764090319 773427100 782449612 791152594 799511608 807485642 815046111 822187928 828910371 835194230 841001351 846296115 851070826 855358874 859225993 862735631 865904416 868689576…
647225004 645235769 644182110 644149078 645167469 647227556 650270713 654170025 658742393 663815573 669302290 675202306 681527630 688245413 695317217 702785328 710781251 719414163 728642664 738263124 748021876 757728287 767269025 776559846 785530118 794150726 802437465 810407563 818043930 825303370 832136125 838482964 844273372 849460269 854070417 858210175 862004103 865514680 868711475 871510331…
657726994 655806174 654772514 654746714 655779513 657831007 660797149 664547661 668954261 673917409 679380491 685311357 691670774 698410199 705506190 712995369 720966646 729495534 738560878 748020679 757672660 767330996 776849176 786111702 795048214 803649992 811937484 819901969 827493096 834660184 841381125 847641311 853404549 858628394 863309463 867500811 871281448 874714766 877829292 880616891…
1017304594 1016529207 1016811691 1018174708 1020623760 1024091861 1028422341 1033419707 1038904474 1044730118 1050792554 1057053668 1063543741 1070325000 1077463948 1085042124 1093151275 1101823338 1110951522 1120298802 1129591981 1138605841 1147180296 1155206502 1162627236 1169442057 1175695418 1181454347 1186786244 1191736964 1196317239 1200506164 1204264984 1207559176 1210396563 1212857034 121…
699943183 697968259 696960422 696954402 697965722 700002633 703016624 706871137 711381617 716395199 721835582 727679017 733901124 740462288 747350135 754624360 762397068 770746402 779635752 788913924 798391096 807907735 817336782 826553633 835437491 843901522 851910638 859480127 866662173 873504476 879992609 886039502 891548265 896484529 900893087 904869524 908520174 911911372 915022588 917758343…
710605619 708652894 707670776 707731808 708840503 710948540 713962402 717757682 722207575 727208466 732683382 738568964 744808709 751366579 758253341 765540130 773331139 781692794 790585207 799860553 809336359 818869552 828358730 837697160 846757398 855430175 863661946 871449209 878810826 885771595 892352412 898548626 904309692 909554325 914225387 918341326 921995346 925296413 928295220 930956243…
616480467 614434099 613250254 613099420 614061038 616087154 619048493 622799046 627206110 632161214 637590837 643450360 649698344 656287189 663195053 670470426 678230003 686580807 695517576 704894528 714499601 724139312 733649366 742873189 751688445 760055907 768010878 775602461 782853530 789765287 796327688 802510800 808255393 813490499 818178601 822351453 826094508 829487982 832560042 835286854…
628108319 626064018 624838072 624574137 625372500 627254664 630137905 633841054 638150923 642920930 648118876 653787709 659969829 666660406 673813086 681386775 689391545 697875061 706846651 716219341 725829602 735494136 745041712 754326104 763245320 771749558 779825597 787487051 794778651 801753205 808411549 814670104 820408516 825557643 830145248 834269441 838033790 841488619 844608054 847320068…
627211809 625243982 624151444 624045662 624990193 626983396 629950769 633751942 638210803 643172937 648555810 654342390 660526283 667080880 673997871 681343009 689237644 697754852 706826701 716258773 725831681 735379117 744783492 753946916 762804162 771343951 779575599 787471889 794967150 802006220 808571373 814664815 820286732 825430842 830089804 834270639 838011364 841366555 844361887 846973095…
609544440 607709492 606696426 606655883 607663898 609685957 612604966 616269812 620529406 625262747 630411626 635984228 642007622 648472860 655342546 662618054 670376171 678706162 687595582 696879410 706297460 715595611 724592240 733197325 741405511 749265354 756828769 764113015 771096653 777730273 783945102 789675476 794897055 799639433 803950754 807859038 811378049 814533094 817353488 819840387…
633600654 631648491 630636779 630661968 631764000 633914608 637013077 640914195 645468451 650555299 656103933 662086691 668482959 675254740 682371147 689852759 697773811 706207688 715160748 724544201 734195903 743928263 753570302 762989398 772096182 780837968 789185245 797120016 804630720 811709283 818348777 824544395 830292237 835582112 840400604 844756575 848700027 852293201 855549272 858408404…
643969762 642146673 641205994 641259492 642374667 644536566 647635175 651511945 656025186 661080315 666619366 672598318 678973811 685707656 692792459 700282130 708281902 716868731 725994711 735476356 745089775 754662902 764072458 773200385 781950193 790299796 798293051 805969166 813321204 820315914 826917226 833078703 838739413 843853779 848431334 852542667 856278947 859693344 862769415 865443598…
602926057 601126301 600160135 600069757 600898634 602691232 605426353 608972851 613133606 617746395 622750227 628162631 634003801 640251333 646866191 653851968 661280169 669244686 677767564 686731921 695907949 705049403 713972856 722575977 730823402 738724788 746301575 753559564 760493886 767104606 773380487 779266551 784672070 789527727 793837723 797680322 801161818 804357701 807272817 809844829…
615467021 613615509 612612869 612542624 613413769 615196429 617838672 621243791 625265554 629765081 634679658 640026344 645836207 652090945 658732295 665736241 673162864 681106012 689580193 698459856 707523983 716546670 725356811 733855007 742010901 749843091 757374883 764589966 771432546 777858148 783876217 789524952 794803940 799653103 804012551 807895586 811391311 814593326 817525650 820137423…
690709971 688965562 688073889 688121208 689159399 691155080 693985448 697484174 701489899 705882357 710621959 715764112 721397217 727548728 734177724 741261530 748837361 756921810 765414006 774108928 782791776 791301256 799530367 807414471 814929927 822082079 828882506 835342093 841478763 847309398 852820533 857952058 862622858 866786363 870474357 873792389 876862432 879745865 882399073 884700544…
832836322 832143819 832598140 834154142 836671380 839988243 844017101 848723765 854002252 859638667 865448047 871411841 877650759 884307054 891483269 899230988 907523211 916237224 925183179 934137381 942861700 951145714 958856122 965937704 972384964 978238395 983583167 988510640 993083134 997345516 1001338921 1005066939 1008455757 1011381853 1013771777 1015694601 1017343415 1018886275 1020319237 …
804497792 803904973 804301769 805648318 807951137 811225942 815396864 820267182 825606737 831258638 837168312 843354158 849890618 856908105 864556941 872927008 881981764 891547980 901346351 911049307 920369995 929143114 937327850 944931856 951935961 958285514 963944968 968957648 973439995 977505784 981210913 984578793 987636627 990394369 992832626 994962144 996862658 998609284 1000178862 10014698…
653456201 651512218 650604942 650693378 651732055 653781571 656919700 661036498 665815991 670979791 676480909 682399162 688732403 695402322 702413798 709875154 717863512 726367164 735346156 744742275 754416980 764158615 773768885 783104690 792057727 800554504 808577979 816152388 823306437 830065455 836454489 842469895 848046262 853082264 857525257 861431836 864930840 868121652 871016899 873577907…
708316810 706590277 705859083 706200561 707614487 710039462 713380420 717512026 722274886 727509847 733118991 739089590 745455228 752241457 759454127 767112811 775276674 784008801 793288618 802955633 812752143 822426738 831803069 840783101 849327521 857438272 865132684 872419723 879303393 885797747 891914204 897626602 902866426 907575970 911773928 915555813 919015714 922171560 924973417 927370431…
1036780790 1036889044 1038028897 1040217788 1043416409 1047483488 1052223388 1057480588 1063169666 1069232514 1075607736 1082252899 1089171471 1096398271 1103970556 1111929081 1120322124 1129153622 1138304847 1147532458 1156562122 1165175318 1173222442 1180613881 1187337530 1193463483 1199103633 1204363895 1209316714 1213976393 1218287316 1222162001 1225546512 1228447936 1230917069 1233028519 123…
653297326 651264118 650129489 650024927 650985187 652989084 655981829 659844184 664389775 669439723 674898338 680748033 686990681 693614012 700611311 708020920 715930206 724413385 733446378 742888800 752550370 762254026 771839331 781161585 790131702 798735031 806976848 814822590 822215665 829136839 835613969 841672395 847295401 852443233 857107700 861339752 865214973 868770207 871975133 874760360…
703628130 701944967 701165739 701354266 702565907 704841818 708154660 712380252 717336825 722852589 728811171 735165544 741923044 749106087 756724866 764795675 773366367 782480577 792100297 802083991 812249752 822439170 832516695 842351163 851841412 860950329 869680864 878020386 885933678 893404708 900449143 907073258 913243840 918912110 924053162 928676850 932819377 936531376 939851650 942777193…
948881043 948260384 948715483 950246306 952827030 956416143 960934189 966238214 972136526 978448767 985062995 991944488 999104207 1006573065 1014409534 1022711587 1031579188 1041027396 1050925612 1061029711 1071080374 1080879293 1090295600 1099234333 1107619853 1115408112 1122608236 1129289715 1135557719 1141498141 1147127202 1152388083 1157197703 1161504572 1165318394 1168699355 1171719005 11744…
677683266 675958387 675183976 675415720 676697732 679049139 682411971 686638545 691544460 696976391 702840447 709090387 715708056 722697868 730092487 737951739 746337063 755262019 764649705 774339677 784147750 793921347 803538170 812879690 821848106 830412447 838600401 846427891 853862410 860868919 867458472 873659900 879458579 884794216 889622291 893964903 897898615 901491091 904739750 907571821…
762748560 760610739 759484426 759474067 760602183 762840560 766120408 770314073 775246834 780768328 786814750 793382888 800449687 807946242 815818785 824091882 832852634 842170632 852024951 862287086 872757083 883217364 893477178 903408412 912964993 922152624 930959785 939334126 947243682 954732669 961878030 968696111 975112780 981013057 986305484 990968723 995074868 998754006 1002094963 10050763…
781635219 779544900 778499590 778615455 779905383 782308258 785727926 790038829 795080616 800690857 806761841 813254528 820151340 827414329 835010643 842974305 851416655 860449624 870084456 880197897 890581369 901003192 911234047 921070960 930395197 939210646 947599036 955633327 963338880 970709549 977719124 984314344 990426573 996007690 1001058464 1005636147 1009838720 1013745174 1017328566 1020…
678754972 677093066 676336350 676564766 677809523 680064794 683289539 687386539 692196913 697548557 703327098 709502455 716095668 723132046 730621834 738566061 746966108 755823951 765128067 774826800 784801378 794857427 804755045 814282933 823336550 831928837 840118570 847938352 855398562 862528844 869366114 875890436 882002604 887589772 892613865 897135572 901261456 905066269 908546488 911633246…
676394675 674799391 674097024 674350919 675589014 677815985 681009285 685094517 689937869 695389279 701338827 707725538 714507527 721651719 729158995 737084136 745512910 754497881 763994582 773853694 783877046 793876793 803692602 813198233 822326401 831069605 839430257 847381826 854893208 861967547 868631019 874894001 880741573 886156528 891142834 895733392 899976043 903894198 907447558 910541086…
685507563 683875033 683125011 683351217 684616258 686922971 690183279 694233463 698907395 704107745 709809048 716001843 722648071 729693746 737115715 744949097 753266180 762113896 771449584 781130936 790973712 800814562 810518380 819961231 829049268 837748277 846059263 853964409 861426380 868441703 875060155 881329613 887231655 892687963 897635727 902094868 906155314 909891911 913292640 916275088…
643777004 641656947 640387128 640091111 640858532 642725834 645632984 649409578 653833883 658735021 664050503 669790886 675963666 682545251 689518808 696915719 704803966 713228763 722154130 731451637 740941791 750447025 759816522 768931210 777714276 786136143 794194398 801890078 809225381 816200806 822790822 828933707 834567712 839673601 844272895 848403907 852119266 855483313 858529994 861221585…
639557206 637525948 636342910 636158287 637086846 639119655 642100644 645803025 650036295 654711899 659848158 665514948 671739469 678452289 685547429 693002058 700906820 709354562 718312774 727620931 737089530 746566078 755916151 765001974 773725499 782077832 790106938 797827905 805183830 812099110 818546807 824543081 830089737 835157137 839735145 843875051 847655249 851110183 854205604 856876407…
631099777 629099552 627944459 627779505 628687051 630640326 633520845 637167933 641419893 646150757 651303313 656885820 662920012 669390345 676254864 683506876 691206578 699425396 708150000 717252773 726559433 735924610 745231799 754352956 763150401 771520758 779419119 786848133 793844629 800467204 806760252 812707838 818228205 823227633 827671562 831614529 835166186 838419485 841394701 844041446…
647568908 645540438 644350039 644134921 644981785 646907514 649841433 653632904 658093578 663058963 668433287 674189629 680334616 686879075 693843889 701280717 709260533 717818857 726903340 736372706 746040453 755716350 765225192 774427624 783252994 791704478 799811615 807577446 814977466 821991556 828610001 834810198 840550923 845799769 850562077 854885508 858840400 862481634 865806252 868743937…
657733452 655719394 654616783 654536084 655512608 657537255 660546576 664392520 668869204 673805368 679133024 684867339 691037667 697647352 704684998 712156009 720098617 728560606 737536660 746915596 756500633 766091112 775542942 784767600 793709889 802333970 810601672 818454234 825838339 832754427 839249611 845348213 851009454 856171340 860830105 865066406 868989715 872648043 875981983 878871692…
694423687 692557799 691731684 692008754 693391676 695838452 699235659 703387613 708058344 713051351 718282144 723790585 729674378 736006116 742821720 750167369 758101663 766617209 775572962 784724243 793818585 802666291 811152026 819221077 826866916 834110297 840966520 847428389 853485262 859152873 864468386 869447421 874056540 878246311 882015921 885436016 888602201 891561832 894269334 896598788…
643733770 642097579 641355082 641520328 642627592 644720311 647789543 651726858 656353570 661502918 667079885 673062778 679460821 686265070 693443255 700991946 708976094 717481393 726516978 735975697 745681271 755448703 765100400 774469608 783441336 792001291 800212530 808115998 815662613 822759635 829365361 835502960 841183338 846359485 850991131 855136244 858931523 862463951 865685700 868475372…
645245300 643551136 642757432 642863538 643941456 646075339 649241421 653277584 657971255 663157373 668741465 674682924 680996413 687747384 695007637 702818725 711201035 720141517 729523905 739118002 748705668 758193508 767553360 776701217 785511753 793922033 801946580 809609947 816929331 823941808 830670675 837051749 842942169 848227625 852912375 857105411 860930125 864442311 867616499 870395105…
1115372637 1115353286 1116554983 1118882010 1122214114 1126412558 1131278493 1136570388 1142081521 1147690595 1153359130 1159127503 1165122978 1171531995 1178529626 1186223233 1194631383 1203654557 1213036939 1222398930 1231364247 1239671186 1247172720 1253783337 1259473113 1264300632 1268423183 1272069015 1275471179 1278765133 1281922284 1284808877 1287326999 1289493336 1291401722 1293143473 129…
668048404 666162304 665179231 665213575 666316500 668445831 671478586 675258490 679640426 684507866 689781534 695438537 701512513 708046058 715044016 722494621 730422760 738876387 747843711 757206028 766774767 776344623 785711040 794694822 803201536 811247015 818894164 826169468 833057949 839556958 845688178 851445065 856759612 861547719 865785619 869534279 872894240 875940935 878691978 881119648…
644734380 642675344 641422182 641124140 641867301 643638924 646345933 649865872 654076563 658856802 664096755 669727740 675730207 682102878 688845221 695993290 703649464 711920553 720798876 730117803 739628826 749103599 758370964 767314047 775878101 784064923 791880439 799285760 806223595 812691992 818760383 824492399 829866236 834792747 839211372 843154767 846719738 849985559 852957030 855571166…
788482623 787671228 787952762 789384465 791919021 795412395 799671358 804496315 809697373 815108720 820632921 826295523 832244100 838668893 845716699 853466979 861929372 870992977 880377316 889696651 898616556 906950532 914627850 921625710 927953237 933660155 938829395 943571350 948017258 952268743 956327398 960097883 963476593 966422637 968951563 971107975 972959850 974571634 975942917 976994284…
827731321 826353692 826078133 826938947 828925855 831952309 835850274 840417569 845471699 850881438 856586988 862607538 869013113 875868322 883199964 891016448 899334424 908151777 917381416 926826679 936236152 945382749 954105964 962327094 970057599 977368469 984312036 990874399 997016157 1002733273 1008045141 1012939349 1017369128 1021313739 1024826006 1028019491 1031010444 1033846274 1036458788…
651616541 649661860 648520213 648355194 649306616 651399368 654503841 658400007 662879967 667813700 673163194 678953261 685209124 691906979 698995161 706467135 714390982 722839810 731785802 741070302 750479244 759840032 769050259 778045504 786773072 795194088 803284958 811029411 818420698 825468251 832179801 838524721 844425324 849801644 854635088 858990617 862972929 866651241 870013962 872987380…
657644831 655818655 654870945 654858672 655818415 657750523 660593818 664223568 668486297 673258571 678490104 684190874 690374342 697023052 704112595 711648277 719658711 728157022 737112582 746442806 756009785 765624924 775082366 784221825 792979802 801378747 809458673 817219783 824629263 831662687 838311250 844544352 850291141 855489542 860157943 864396305 868300627 871885056 875094708 877876758…
740524538 738870081 738190357 738607120 740104119 742570440 745878660 749909100 754525517 759581195 764980010 770721928 776870381 783476133 790540917 798047011 805998406 814406851 823225191 832309002 841464207 850522389 859350862 867819587 875818211 883315333 890361800 897022531 903325923 909274147 914863548 920078724 924889229 929272799 933242225 936848176 940156828 943212249 945998574 948433971…
657837503 656068051 655162293 655218061 656288352 658360096 661352558 665141720 669591978 674581028 680015910 685839379 692025344 698568559 705479369 712789351 720555571 728836059 737632215 746845859 756300021 765799914 775170702 784266731 792993314 801329513 809299502 816909682 824132255 830948853 837373799 843414042 849029311 854158825 858782963 862943826 866709003 870124265 873192885 875886072…
916201808 915476939 915808707 917277555 919880252 923498799 927935890 932967982 938384543 944035167 949875689 955965726 962415224 969333963 976811749 984899633 993571563 1002697152 1012061220 1021420638 1030559572 1039316900 1047587604 1055313840 1062475697 1069085199 1075187818 1080864318 1086208790 1091279134 1096061694 1100488907 1104491546 1108037930 1111143393 1113862180 1116264660 111839819…
703908401 702356521 701671896 701879763 703050061 705255161 708488389 712636156 717533123 723040216 729071547 735566744 742461915 749695425 757240085 765134240 773479945 782384505 791870539 801829348 812058065 822334373 832464531 842300329 851749313 860773086 869363256 877518819 885249107 892582595 899546836 906128823 912266947 917898949 923019218 927682074 931955291 935878614 939447256 942606281…
713823528 712139176 711366748 711603009 712903037 715270297 718644355 722902630 727882860 733423077 739405540 745777165 752530767 759673258 767219686 775209631 783708166 792771041 802389595 812452650 822761412 833093996 843265416 853140597 862623132 871659148 880246606 888419153 896209915 903625097 910640018 917211330 923298045 928883008 933982987 938639622 942894348 946762753 950227496 953254872…
713636323 711915004 711138500 711441140 712857923 715325239 718733505 722972754 727935707 733504946 739566730 746041690 752885731 760065146 767566428 775445538 783829261 792821425 802400798 812418904 822678995 832992657 843177171 853054007 862493216 871461036 880006684 888193563 896039922 903515145 910574515 917184290 923318956 928957316 934100622 938790154 943087363 947026425 950588643 953722331…
697829923 696294758 695735098 696207945 697714419 700232998 703719519 708071677 713123949 718704557 724703371 731090912 737887845 745125175 752826873 761015453 769715934 778933547 788613700 798627578 808808004 818998984 829069012 838899200 848390309 857482483 866149415 874378956 882179531 889591159 896650289 903335250 909571622 915301543 920536068 925341512 929787597 933898953 937631582 940892876…
680828671 679328160 678828475 679356784 680867011 683305701 686640465 690814883 695704327 701145017 707007963 713247714 719896769 727017786 734650242 742797452 751453922 760608521 770191740 780040727 789953546 799773737 809401794 818751287 827745087 836354536 844599654 852498499 860040407 867209907 874003120 880405672 886381230 891907978 897015905 901762644 906170629 910203435 913800889 916917279…
707657055 706090220 705487511 705890968 707321929 709779057 713220238 717547099 722612782 728262606 734383401 740920706 747856065 755181263 762903365 771065771 779737320 788951077 798643284 808664107 818854263 829095096 839278767 849267846 858927931 868193269 877066113 885552845 893633524 901298323 908572546 915469751 921931770 927854484 933192752 938026284 942502184 946707989 950601130 954055528…
683337611 681764143 681167574 681635510 683180634 685746975 689242235 693558360 698565753 704122292 710122436 716539838 723405684 730741326 738524116 746723931 755353024 764446945 773984652 783848372 793876799 803934822 813909476 823669305 833082037 842078490 850665568 858868055 866681221 874084606 881072650 887650144 893808104 899523679 904787190 909619975 914057972 918114919 921758752 924922966…
679897871 678359535 677719715 678081384 679483753 681907633 685287056 689524212 694506610 700116437 706230217 712729258 719535492 726647731 734137891 742106000 750630566 759735818 769369063 779392276 789609464 799824511 809889535 819717894 829268938 838516006 847410879 855877032 863851127 871333126 878381811 885052715 891342797 897194320 902546355 907387366 911772267 915787729 919480314 922807918…
698596092 697081733 696469092 696856142 698273027 700691677 704058680 708300750 713310523 718951940 725086274 731599337 738429298 745586418 753135138 761143548 769650186 778665500 788167414 798072687 808222848 818409713 828420098 838085943 847334276 856192895 864719286 872919330 880751116 888190374 895249159 901926646 908179909 913962323 919274558 924166878 928697204 932881843 936670884 939972777…
747011432 745533040 745074817 745643542 747237201 749836365 753393448 757824331 763000329 768768160 775001734 781634499 788643406 796028140 803823241 812106499 820957636 830390948 840322732 850598562 861051827 871537620 881912147 892004199 901651858 910783219 919435120 927679663 935555817 943077831 950264256 957117357 963588504 969598685 975098194 980095377 984632994 988748941 992453155 995724633…
738865566 737250083 736543151 736781230 738049565 740428708 743914165 748385261 753645384 759499789 765817545 772543838 779671019 787208470 795177988 803617920 812565434 822018280 831909806 842124672 852539174 863033144 873454639 883604710 893309056 902516317 911296411 919733277 927841110 935581093 942914252 949811224 956235775 962154862 967571943 972539099 977126212 981367642 985227545 988615286…
748934159 747075437 746227080 746471219 747862013 750395805 753979135 758438374 763575982 769238669 775351673 781903357 788903760 796353037 804241526 812575727 821392121 830719943 840517415 850660562 861002009 871412280 881750060 891841020 901540928 910807668 919671839 928145427 936192047 943773981 950883718 957518615 963653653 969262420 974366638 979059060 983463919 987648893 991556032 995024616…
694664828 692829947 691896964 691981350 693137928 695352532 698555277 702624754 707399061 712725908 718519093 724756054 731422522 738481740 745909003 753741778 762071843 770968693 780398969 790215683 800219051 810219227 820052929 829583619 838722899 847446592 855770403 863714948 871302388 878560588 885492365 892039084 898103084 903621251 908611071 913145174 917290225 921064653 924435679 927352686…
692912836 691068717 690094357 690078140 691117690 693274252 696503679 700652663 705534722 711005944 716971659 723352941 730082139 737134911 744551119 752418510 760829149 769822797 779342352 789239592 799327770 809422103 819342962 828932771 838108288 846874895 855257860 863236307 870771440 877873736 884595496 890959878 896932277 902461849 907522348 912114696 916263042 920014211 923410219 926445311…
675374827 673551840 672630720 672744635 673930521 676118803 679181584 682992315 687451292 692479350 698006500 703973839 710347721 717126769 724328960 731978227 740107599 748747869 757873766 767357744 776999220 786601263 796012292 805123363 813869372 822232805 830215806 837803436 844968799 851706643 858039693 863988662 869547706 874693610 879416695 883741607 887713968 891358468 894645296 897502182…
734273674 732480894 731653500 731928015 733360264 735926690 739549346 744098981 749395103 755248121 761525251 768179048 775221235 782680608 790582962 798955174 807828312 817214205 827064826 837259744 847639715 858043184 868312320 878301108 887911382 897112835 905912353 914318278 922343961 930014275 937332666 944247925 950680197 956584919 961980246 966914662 971424245 975523504 979214031 982478706…
729433846 727773039 727028911 727334983 728772769 731349438 734981810 739512195 744766373 750611975 756965369 763758825 770926780 778432601 786299717 794610715 803466975 812919479 822910052 833279083 843835231 854404455 864816126 874894924 884516991 893666822 902408551 910799050 918835509 926469858 933650564 940348756 946556100 952270828 957500493 962282427 966683496 970756969 974492828 977814006…
728887693 727202405 726516719 726897959 728368959 730901598 734404022 738737073 743761962 749375763 755507440 762097897 769096783 776476655 784244310 792437521 801108075 810291068 819961913 830004712 840229183 850434708 860465240 870212847 879596450 888560922 897090523 905200658 912905667 920197643 927056067 933464195 939400879 944824689 949700492 954062266 958024541 961694674 965075602 968078536…
1120512214 1120901322 1122398705 1124990557 1128669269 1133375851 1138949709 1145147870 1151715908 1158470252 1165360290 1172469409 1179936883 1187862979 1196287253 1205233603 1214722231 1224698102 1234954017 1245158707 1254986073 1264222685 1272764856 1280558463 1287583262 1293884797 1299581776 1304822952 1309729320 1314353590 1318671287 1322612664 1326116377 1329163218 1331780249 1334036272 133…
1065802836 1065700805 1066676775 1068668638 1071635764 1075527755 1080235663 1085596178 1091431007 1097584408 1103960695 1110558108 1117460125 1124775665 1132590509 1140974641 1149988774 1159615244 1169663618 1179787516 1189634447 1198976257 1207696284 1215708235 1222951777 1229460198 1235378629 1240890024 1246125134 1251126138 1255860293 1260255472 1264243576 1267797094 1270940145 1273730247 127…
995988367 994995703 995016103 996115379 998340329 1001646326 1005879610 1010852413 1016413229 1022436863 1028805640 1035461586 1042457927 1049907534 1057886480 1066416841 1075504371 1085115646 1095108618 1105243066 1115287388 1125091628 1134555454 1143575283 1152057318 1159961084 1167304761 1174139577 1180531788 1186548335 1192229811 1197567261 1202504514 1206964346 1210892019 1214302781 12172880…
1143063106 1142860172 1143767786 1145757465 1148785150 1152766685 1157552275 1162960241 1168821402 1174983572 1181312328 1187740612 1194325847 1201221102 1208564589 1216401016 1224692904 1233353582 1242239595 1251142922 1259830451 1268095037 1275776984 1282781297 1289104427 1294821647 1300022566 1304767889 1309109616 1313113281 1316824616 1320223153 1323234100 1325796086 1327923998 1329716679 133…
831590939 830224905 829852775 830576692 832410207 835263192 838989764 843444104 848489163 853991344 859851570 866044246 872604179 879575336 886989252 894882089 903287362 912177564 921418636 930806001 940153889 949342069 958282613 966875044 975020147 982667844 989834362 996577925 1002960316 1009006923 1014680067 1019897288 1024590369 1028748033 1032409179 1035640093 1038527031 1041160124 104358544…
747028036 745031561 743891871 743764234 744709382 746681888 749578043 753274606 757641984 762569866 768002559 773932825 780348339 787197479 794422619 802022014 810062216 818612616 827654925 837050694 846590886 856068562 865316446 874221149 882740169 890895432 898723493 906233338 913418300 920280169 926807558 932939077 938580205 943668312 948217696 952309516 956046750 959501395 962674410 965497648…
754701248 753116127 752485792 752866622 754270751 756683406 760064509 764328428 769344258 774976624 781132361 787771551 794878256 802423847 810365747 818688012 827432495 836664956 846393524 856519074 866860979 877217213 887402895 897272054 906749686 915845567 924603091 933020957 941044056 948633289 955810062 962612161 969029817 975008669 980502830 985508181 990053707 994171889 997868322 100111296…
756544867 754969504 754329616 754684062 756064694 758469149 761851291 766116732 771128612 776737436 782834526 789392262 796443692 804009661 812053472 820520004 829402546 838735094 848510007 858623232 868900620 879152335 889205007 898929754 908275606 917264318 925930506 934266310 942225986 949771561 956903043 963644334 970001653 975941041 981418427 986431017 991017425 995196077 998925553 100214966…
845552606 844797807 845058662 846398819 848799813 852148044 856272493 861017015 866283547 872018010 878183348 884763850 891776423 899247703 907180722 915562008 924390117 933655952 943273026 953044248 962715754 972061209 980926739 989244054 997037558 1004398405 1011411593 1018101974 1024457729 1030481541 1036184051 1041534280 1046457127 1050901366 1054897154 1058531120 1061869253 1064911464 106760…
1007674103 1007563829 1008617456 1010796637 1013998135 1018080876 1022868907 1028181489 1033868769 1039816756 1045955700 1052302643 1058977912 1066139066 1073893054 1082269573 1091225159 1100611819 1110149820 1119487233 1128316300 1136435394 1143730647 1150157775 1155763939 1160690862 1165116930 1169187853 1172995120 1176584451 1179947634 1183012585 1185684513 1187927730 1189804459 1191423786 119…
666407679 664901786 664325114 664765876 666204758 668554598 671737406 675693444 680338918 685565594 691290095 697472989 704080168 711055158 718357498 726023814 734165083 742877246 752137467 761782004 771581679 781331736 790878121 800102838 808932246 817358081 825416130 833134554 840514999 847552435 854242753 860566207 866484886 871966810 877007696 881631211 885872935 889754720 893260717 896339195…
687091888 685457994 684775272 685113490 686461419 688760145 691928346 695858791 700422882 705514413 711095089 717181878 723782028 730849228 738315046 746163358 754457439 763268924 772569274 782201366 791959241 801673822 811217504 820473241 829349502 837818063 845902448 853628209 861001825 868025263 874700411 881015153 886941849 892452469 897528022 902160093 906356132 910139368 913530202 916526387…
1123203211 1123315196 1124390855 1126461322 1129504602 1133445246 1138153687 1143468051 1149233083 1155332066 1161705735 1168359678 1175343503 1182707041 1190485187 1198721146 1207449011 1216599970 1225940509 1235148485 1243956097 1252207955 1259815397 1266716515 1272897345 1278418124 1283393437 1287950241 1292201941 1296231186 1300059441 1303623575 1306807118 1309525037 1311788023 1313682799 131…
658973328 657449681 656856866 657209378 658507226 660758561 663937003 667936236 672593033 677768181 683403038 689495865 696034239 702969312 710263459 717948392 726112424 734814785 744008036 753542332 763236864 772937685 782518005 791862800 800884571 809541452 817814617 825679054 833121819 840173869 846882712 853246600 859203730 864697651 869736369 874378991 878675876 882624828 886170999 889241841…
662939129 661402986 660766862 661072537 662343420 664588335 667760438 671739551 676386992 681611937 687365144 693584149 700181900 707099935 714356307 722033721 730224315 738970035 748220252 757827078 767594116 777347168 786961275 796331560 805351799 813942454 822083367 829798217 837114888 844053201 850632292 856860399 862719836 868185678 873262148 877982754 882369667 886403551 890032946 893201927…
763259295 762005357 761984376 763170828 765423133 768571817 772445293 776861340 781654535 786730946 792079183 797729474 803725932 810136357 817051331 824546875 832646465 841305609 850399591 859716340 868991021 877979713 886515125 894510709 901934841 908785383 915080234 920869735 926246042 931303977 936065037 940452077 944366445 947798093 950856765 953702622 956449512 959108146 961579516 963689567…
632110153 630217551 629185108 629103042 630015540 631916041 634748761 638403554 642731446 647600077 652940429 658728769 664930717 671488412 678378053 685671819 693514435 702001202 711059118 720457340 729943614 739360539 748635780 757710276 766518673 775018998 783198209 791046151 798542760 805663764 812379067 818646157 824417609 829660094 834370626 838584420 842369303 845798879 848911240 851682932…
647992701 646267550 645327518 645324756 646349941 648371527 651266828 654886393 659095116 663797913 668953157 674552024 680580312 687014067 693850643 701120087 708854978 717055774 725677830 734627978 743767003 752932302 761972749 770769847 779242253 787347786 795079812 802448532 809461867 816126579 822455374 828448411 834061348 839215440 843864490 848048604 851863235 855371986 858557351 861350655…
926101860 925407172 925710213 927064830 929476209 932868362 937087296 941942491 947257494 952905320 958826997 965037230 971604212 978600727 986067789 994025052 1002486311 1011419603 1020685955 1030052400 1039286748 1048232003 1056797131 1064918057 1072554071 1079700421 1086375299 1092596500 1098380633 1103753791 1108745455 1113367745 1117601108 1121402206 1124742049 1127656042 1130249284 11326239…
670121558 668439309 667578316 667672983 668797489 670930962 673977838 677807499 682277295 687254543 692654574 698464717 704717195 711433774 718607145 726236499 734354758 742989043 752092510 761538303 771181850 780896992 790544186 799955815 809000469 817644098 825914152 833819250 841335972 848459138 855216242 861608875 867560010 872956513 877761924 882070413 886026813 889702108 893064568 896052178…
660888966 659373444 658677921 658911144 660110241 662218509 665141007 668810460 673176760 678155617 683631531 689515623 695776663 702415925 709439386 716867081 724749248 733140884 742039258 751341803 760866816 770413378 779808216 788927865 797713651 806166984 814303955 822107030 829534707 836571198 843234419 849523515 855382439 860737145 865565580 869923782 873906632 877580150 880934555 883893137…
810281671 809350660 809558843 810927691 813422060 816940051 821294187 826245028 831579123 837166315 842965334 849007191 855382854 862224194 869667463 877810721 886671551 896144655 905985511 915856154 925416504 934398049 942631813 950055999 956711611 962704571 968150203 973148428 977789809 982145050 986228348 989981907 993315811 996180532 998617217 1000743036 1002674514 1004445453 1005988615 10071…
634286048 632552186 631637085 631608985 632505415 634326609 637046559 640602446 644869106 649682167 654914136 660517561 666487195 672811119 679489898 686582474 694181378 702321364 710927368 719855012 728956270 738092769 747115547 755876150 764271086 772264450 779868212 787112237 794024638 800612999 806848456 812672081 818023900 822871946 827226527 831139271 834684102 837918827 840847484 843418940…
637451775 635723997 634845972 634931279 636002024 637984950 640765230 644227427 648254644 652738507 657624949 662937013 668728297 675015675 681769445 688963208 696614350 704758408 713372219 722321134 731387630 740351490 749045831 757369149 765288418 772833509 780051948 786951562 793502023 799690953 805544441 811071325 816207091 820846063 824942871 828574820 831889675 834982182 837821269 840299649…
616196721 614269319 613200123 613089599 613993497 615926265 618831346 622562212 626933077 631803606 637112616 642845963 648993809 655538749 662475253 669838459 677702558 686121660 695055920 704364606 713869319 723399304 732779713 741836225 750464070 758677160 766547251 774095959 781274378 788039241 794403480 800391847 805973341 811066937 815613572 819631323 823205024 826432385 829370199 832009533…
637650153 635584517 634422326 634284211 635244189 637310665 640389095 644289425 648802135 653781958 659170891 664960381 671142654 677697972 684628551 691999064 699919521 708457877 717556837 727037930 736682051 746299285 755739087 764880197 773647018 782027616 790047279 797719470 805032504 811969427 818509830 824611556 830219266 835302453 839875463 843987159 847707908 851110715 854226793 857012477…
619216038 617183170 616060856 615978318 616987921 619061995 622090181 625903996 630336999 635276325 640666263 646477472 652680251 659244359 666165162 673494211 681332830 689763209 698757457 708151434 717715557 727249683 736615921 745719256 754499039 762933736 771017802 778727393 786031000 792930631 799457878 805613086 811328572 816515103 821148137 825302625 829098826 832607988 835801738 838586582…
622734347 620702355 619474744 619226994 620092005 622095193 625136964 629032025 633576725 638611845 644055890 649895288 656142202 662798570 669860992 677353647 685336260 693857499 702889621 712306462 721921296 731543489 741011916 750205920 759053735 767535207 775662021 783443732 790868955 797910730 804537358 810717532 816426834 821654623 826402128 830681805 834530547 838010552 841166389 843975454…
601857053 600025204 599050014 599047501 600088889 602177578 605239696 609135917 613697857 618776486 624275128 630149806 636385908 642978849 649941707 657328413 665226630 673697036 682706296 692120057 701750815 711401662 720890199 730084152 738936066 747460637 755663986 763510444 770960192 778009052 784670636 790931751 796741520 802044623 806824776 811121140 815001704 818513318 821652358 824381304…
608111116 606256412 605235603 605175442 606164336 608193175 611161367 614920240 619311813 624208663 629553355 635351308 641603922 648261786 655273089 662669313 670559965 679022219 688011295 697381721 706965084 716607895 726160637 735474512 744431208 752975840 761116157 768884973 776298793 783347554 790008418 796246371 802002122 807214289 811882487 816098730 819990178 823619297 826937040 829826579…
683783789 681751150 680637968 680561710 681597123 683737619 686884106 690888814 695618264 700981270 706915002 713362393 720262741 727554684 735194363 743189001 751609946 760538435 769968819 779766545 789727411 799665477 809443850 818962775 828160656 837017744 845526943 853662163 861394391 868726707 875681241 882246934 888360654 893946588 898967134 903444786 907453174 911077470 914352147 917231025…
684432056 682455249 681395941 681371805 682456427 684627448 687769556 691726031 696355414 701568461 707330933 713625506 720404665 727590639 735132597 743061698 751476581 760455958 769969751 779868694 789952984 800041822 809992195 819698369 829103259 838187097 846915392 855212646 863012123 870315253 877169869 883592878 889539723 894954754 899837497 904255708 908300230 912022819 915401806 918360937…
677932541 675806895 674652408 674547865 675532622 677618834 680755991 684800095 689542134 694788325 700436545 706494455 713023414 720054023 727557115 735500404 743910875 752844175 762286351 772111965 782141525 792204225 802135113 811765713 820974575 829743951 838136427 846211548 853970648 861362791 868315804 874760782 880650629 885976142 890771006 895099265 899030423 902610513 905838203 908666567…
645896637 643970957 642916199 642842589 643828886 645884956 648930189 652813095 657364837 662455322 668014225 674004156 680382276 687104726 694176290 701682154 709746348 718437009 727695755 737347227 747170831 756968774 766589054 775919435 784885876 793460588 801661950 809531496 817090963 824308535 831108786 837416730 843186639 848400521 853073523 857274012 861106956 864643454 867866202 870695839…
649789965 647872868 646876875 646923030 648050735 650233100 653382343 657348180 661948117 667034634 672549357 678511853 684948538 691832797 699107018 706766037 714892972 723579667 732808486 742429455 752246027 762092582 771832078 781335117 790506419 799313663 807754168 815801382 823413254 830582922 837339407 843683860 849550026 854849298 859551774 863717458 867454821 870851144 873927414 876642508…
651272084 649319524 648310595 648367442 649523908 651717398 654834557 658750938 663327545 668417787 673927553 679862744 686283006 693206329 700584160 708369472 716576507 725251610 734390904 743895467 753600391 763334805 772954963 782343566 791410391 800108132 808434497 816399257 823984486 831142855 837833384 844047569 849796835 855088883 859931815 864354441 868400270 872091366 875403937 878283407…
650641344 648678724 647579794 647451955 648365800 650332301 653287792 657102609 661613268 666673938 672200397 678164675 684541698 691273778 698307918 705668871 713472920 721845469 730813650 740269508 750014525 759821504 769474521 778805060 787730592 796256368 804422695 812247129 819716476 826815914 833539502 839864512 845733196 851081873 855890946 860196118 864052966 867503559 870571050 873261594…
770396739 768903931 768360656 768861706 770459174 773141028 776804801 781262713 786292270 791708794 797416229 803407234 809724735 816427341 823582373 831262978 839516454 848314330 857531219 866979262 876468863 885839404 894944981 903642615 911822868 919453135 926580922 933295748 939682485 945781529 951564300 956946784 961843947 966225934 970135858 973661887 976878615 979790627 982326732 984401334…
642317440 640478392 639517251 639497781 640471988 642456684 645394683 649153812 653573898 658526735 663946145 669816925 676142351 682913118 690095933 697657882 705613033 714029874 722956819 732325023 741937509 751559439 761010811 770186997 779035061 787535328 795685528 803477333 810889170 817904945 824523273 830735071 836502052 841772654 846522318 850778704 854612497 858099257 861270804 864089669…
623224513 621448187 620484832 620479250 621548277 623721313 626908270 630921599 635547745 640633043 646128276 652059576 658457220 665311142 672589262 680290194 688466370 697174911 706389282 715967694 725722200 735503887 745203442 754703937 763894172 772733719 781256074 789484929 797372361 804834258 811822060 818336229 824381851 829941095 835000762 839591021 843775523 847598062 851045063 854060585…
826467197 825798233 826157400 827592808 830119459 833673687 838091080 843154957 848665564 854478228 860524027 866828383 873492018 880615720 888233234 896325122 904881033 913906535 923347577 933027033 942680358 952058460 961002606 969449107 977391883 984843919 991819467 998336944 1004421909 1010094027 1015352811 1020183668 1024576100 1028535188 1032086324 1035272724 1038132566 1040667196 104284026…
620623637 618685011 617611763 617552103 618586281 620717976 623867894 627883739 632580813 637801355 643454836 649509887 655951843 662756113 669910607 677459435 685503252 694129985 703328329 712962597 722825030 732708614 742448326 751934477 761116513 769987029 778540703 786743660 794547189 801925447 808888427 815454721 821612519 827307168 832472914 837089209 841209631 844924280 848282330 851252344…
850679149 849496279 849313819 850171965 852098850 855080766 859021573 863741826 869030681 874720343 880733189 887074898 893788343 900906505 908441205 916413278 924874210 933859440 943302875 953019589 962784648 972402568 981696919 990499563 998718205 1006403349 1013699358 1020718926 1027476361 1033919139 1039980854 1045599629 1050723716 1055331016 1059443687 1063111219 1066372134 1069229175 107165…
658693782 656728133 655679291 655704177 656859384 659081143 662235294 666187312 670829269 676064795 681801137 687966000 694519850 701447300 708751255 716466963 724666773 733415449 742694115 752367850 762234458 772096189 781783550 791153039 800119110 808692590 816944166 824908174 832540229 839773832 846584484 852972612 858906085 864321523 869194271 873586405 877605295 881310414 884660796 887551412…
675610806 673746918 672734016 672694806 673722415 675846109 678999514 683033679 687778065 693098597 698910079 705156895 711798957 718813566 726203798 734006544 742285574 751088065 760381260 770032126 779858332 789692935 799399651 808861353 817995657 826779429 835227247 843338251 851077678 858404304 865291050 871713701 877639866 883044250 887933663 892354218 896372018 900035832 903344586 906250522…
1002942146 1002582370 1003372434 1005295160 1008285295 1012227488 1016936872 1022173743 1027709187 1033406503 1039258598 1045356654 1051824265 1058768024 1066262525 1074348043 1083006341 1092111298 1101409342 1110586176 1119380560 1127638523 1135282116 1142276774 1148643826 1154463071 1159828730 1164807400 1169437974 1173745242 1177736262 1181390990 1184665769 1187514719 1189927776 1191960849 119…
638724858 636737843 635678568 635659698 636720566 638856147 642007020 646029330 650712475 655864107 661394898 667320579 673684902 680494579 687732206 695408659 703574740 712274446 721487807 731105858 740942824 750775812 760403581 769704482 778656123 787293406 795635348 803646714 811263087 818436913 825148385 831380810 837105082 842299977 846987269 851239439 855141190 858730982 861973373 864791028…
645806624 643802725 642753437 642755085 643848706 646006688 649144845 653134383 657808742 663007169 668644345 674720710 681246825 688178983 695456190 703092878 711206123 719926316 729263810 739055208 749039005 758979287 768720819 778166274 787256899 795983365 804373313 812442030 820165888 827503693 834416430 840857252 846771969 852135446 856980430 861376729 865386194 869038326 872325186 875198971…
724554558 723539826 723722116 725129258 727703776 731316085 735787088 740923700 746539019 752454221 758528472 764731015 771180825 778087453 785644718 793968434 803073019 812836421 822985363 833167571 843072498 852487972 861268096 869299979 876525989 882979143 888777256 894077422 899017217 903663906 907995542 911931262 915398950 918402621 921045857 923483315 925819140 928026200 929955783 931429755…
668887066 666878412 665746271 665642976 666675477 668844969 672038891 676083974 680803493 686044598 691694665 697701744 704075415 710850606 718047482 725674004 733760652 742362179 751495174 761071259 770903767 780777017 790503665 799943335 809012185 817684964 825963774 833836854 841282361 848308246 854957034 861250120 867136796 872520094 877342900 881643529 885522206 889058569 892262655 895090100…
842032408 840782225 840703545 841905075 844387028 848018103 852584775 857862441 863654201 869810671 876250502 882958848 889951787 897247313 904880150 912931188 921508037 930663662 940319942 950274152 960281780 970129433 979645390 988688198 997160139 1005024518 1012298624 1019040074 1025331438 1031233446 1036725204 1041708081 1046090482 1049869997 1053142464 1056056026 1058750798 1061292176 106362…
853239215 851589741 851097801 851894651 853976541 857207236 861391501 866340943 871888984 877887275 884217219 890807007 897635332 904728941 912169531 920095172 928654915 937908955 947743149 957885303 968021244 977909192 987409221 996450883 1005005874 1013076888 1020676606 1027804077 1034446292 1040597104 1046259963 1051430148 1056090282 1060242621 1063950943 1067336475 1070511609 1073502496 10762…
869773191 867799130 866910840 867195936 868656270 871222163 874759504 879072054 883934560 889163338 894672826 900472634 906622238 913192276 920254281 927881485 936131105 944998277 954372659 964046783 973777638 983342976 992557697 1001285492 1009469402 1017135880 1024342695 1031124602 1037490283 1043439178 1048949485 1053965901 1058443618 1062422596 1066040635 1069454543 1072744123 1075879923 1078…
746195327 743987794 742780203 742695821 743784461 746029174 749345334 753567308 758470109 763850796 769604297 775720612 782225469 789140481 796490270 804322665 812701898 821662791 831156159 841042651 851145022 861291074 871308441 881035242 890385231 899372582 908024425 916292646 924098753 931437257 938366716 944896174 950932689 956360332 961152101 965406353 969294169 972957792 976417908 979563642…
591672571 589897218 588991493 589034481 590071450 592112337 595098487 598894119 603337246 608306264 613733145 619565869 625748150 632248522 639095712 646373041 654172628 662531567 671380016 680549678 689856863 699182139 708459584 717610590 726526123 735108376 743297778 751066635 758421425 765407302 772070402 778400455 784326026 789770003 794700642 799139234 803139606 806753933 809991596 812806813…
571793765 569893339 568740636 568556880 569491962 571555770 574617257 578455413 582818223 587501581 592446054 597751265 603542134 609821140 616495206 623533946 631033824 639103276 647720571 656719020 665878793 675016518 684018549 692828115 701409871 709719501 717706629 725342264 732623503 739540862 746057582 752134444 757759031 762935365 767662656 771948262 775831435 779363369 782550355 785327827…
1040691420 1040540629 1041424691 1043345070 1046277278 1050130983 1054738361 1059906512 1065472825 1071310101 1077321536 1083477423 1089849092 1096569360 1103754036 1111469340 1119734012 1128485972 1137534722 1146592318 1155385353 1163739252 1171570462 1178841073 1185543042 1191702255 1197367492 1202588188 1207400538 1211824169 1215864434 1219515806 1222760297 1225570144 1227934973 1229897465 123…
605254066 603126846 601847352 601537194 602278565 604074497 606830866 610392692 614606664 619359746 624578720 630209041 636197298 642500020 649121005 656134752 663648919 671724899 680326575 689330701 698568659 707861393 717040637 725967888 734555723 742778031 750651130 758193304 765397616 772237711 778684817 784707665 790261870 795296467 799786364 803766713 807330957 810576239 813533510 816154421…
631716436 629639334 628428354 628189557 628971320 630758654 633486973 637061306 641358323 646226907 651520330 657146206 663082830 669348938 675972809 682996940 690490874 698519278 707069799 716016604 725170621 734360934 743458345 752350138 760943913 769204801 777153656 784810505 792152008 799124011 805671535 811744370 817290341 822267406 826673558 830564011 834034378 837178425 840044175 842612523…
681185660 679138679 677909897 677639970 678433588 680314975 683212261 686961522 691344612 696175447 701378280 706978526 713021199 719515448 726453680 733853715 741762035 750211961 759164741 768475127 777921166 787283437 796400572 805166975 813520577 821452540 828999041 836194197 843037404 849512628 855616599 861349185 866687526 871586936 876011140 879965412 883504596 886696628 889560169 892043243…
756505389 754856693 754163537 754449796 755722627 758009050 761332107 765641622 770776904 776525021 782731994 789348374 796367123 803756678 811492477 819630201 828286872 837525403 847274580 857361965 867597185 877820746 887913643 897798798 907431181 916764221 925722262 934220710 942218533 949739612 956832877 963512105 969736871 975454305 980664954 985447042 989899934 994048340 997807636 100105732…
758226762 756497601 755839097 756264478 757706508 760097503 763392903 767526449 772373830 777789085 783677608 790023097 796848485 804166597 811970499 820251380 829000815 838184385 847716571 857468872 867303153 877090641 886700012 895990145 904844916 913223879 921166020 928736499 935975549 942894621 949494417 955761194 961650310 967097899 972064223 976565686 980659955 984394486 987762520 990706450…
752630506 751026547 750389648 750775729 752195279 754619373 757982860 762196555 767166217 772801241 779010453 785705906 792823724 800341062 808273224 816661254 825553428 834965427 844833023 855009640 865322576 875625495 885796404 895719004 905302265 914510881 923347529 931803960 939845872 947438383 954564862 961223396 967421153 973168020 978465242 983312942 987739795 991800487 995514986 998822254…
708017195 706572531 706046478 706498988 707976495 710485471 713960782 718258402 723203187 728671216 734622619 741048160 747908218 755146538 762745540 770741560 779190999 788127506 797524540 807271619 817191616 827091745 836797402 846159669 855080876 863555252 871658353 879469673 887003115 894206361 901007349 907358940 913261107 918753493 923880280 928658113 933075660 937106061 940704726 943814795…
736119310 734347009 733603111 733948634 735359942 737774857 741117210 745287952 750156109 755586473 761485460 767813695 774561638 781737592 789383770 797570997 806342723 815658876 825403381 835442601 845661912 855940722 866111595 875981428 885418097 894410251 903026328 911315459 919253596 926775509 933840229 940456417 946647379 952404412 957692752 962507855 966905897 970958084 974675423 977986513…
729760138 728018597 727233936 727490114 728832950 731255399 734677683 738953980 743914563 749420102 755389686 761791480 768623186 775902714 783657052 791903525 800643413 809866115 819531554 829539489 839739046 849975662 860108795 869995043 879506599 888585152 897240607 905480019 913272875 920603314 927516123 934073913 940282017 946080437 951403971 956234034 960596941 964529515 968050855 971155040…
677485381 675192651 673764705 673376084 674125802 675998701 678867982 682544897 686849594 691661196 696921843 702607702 708700532 715181313 722044287 729316956 737065998 745366009 754229452 763545468 773091003 782616168 791932583 800941992 809610282 817927145 825876750 833427503 840543401 847209127 853447938 859309464 864823774 869957659 874629451 878788254 882478611 885807983 888842658 891548964…
683903795 681733670 680551689 680436755 681390116 683343047 686182462 689785505 694036883 698834635 704104853 709809548 715927227 722436792 729338890 736683482 744552709 753002890 762005173 771416664 781007857 790546824 799878300 808926425 817637055 825942637 833786467 841159779 848096594 854631922 860769879 866483619 871729765 876466898 880689127 884458622 887885751 891050061 893938759 896473237…
724174109 722154756 721098428 721105912 722168588 724206054 727107835 730742313 734971625 739699651 744902150 750590242 756748410 763324496 770278894 777630842 785452105 793807982 802683971 811956068 821433824 830931214 840296262 849399776 858134497 866433146 874274334 881675285 888686436 895370883 901756075 907794756 913376422 918384707 922769475 926593274 930003039 933124413 935968963 938450676…
708108989 705833653 704460353 704136151 704942651 706873156 709820836 713595041 717984882 722843339 728122972 733831137 739960523 746481581 753403674 760814043 768823743 777465797 786645999 796178513 805855067 815492281 824943955 834096711 842873273 851245747 859232175 866859040 874118794 880965333 887344126 893217763 898572722 903425297 907829620 911866957 915612959 919106348 922332547 925219841…
726604376 724507340 723279715 723016309 723794385 725628104 728439881 732071598 736331803 741065158 746206796 751777249 757819637 764339469 771304468 778695959 786549178 794930226 803860622 813257009 822937461 832674126 842243852 851469166 860255300 868590333 876491738 883959413 890991224 897618140 903886571 909803477 915316815 920353819 924876578 928911593 932536572 935832238 938830690 941499561…
747339495 745310671 744251048 744206483 745182232 747138341 749984785 753603610 757881909 762731032 768088384 773904638 780124050 786687258 793577318 800866891 808691769 817146654 826196726 835685522 845407635 855159394 864747537 874006650 882839959 891230182 899194735 906738106 913851317 920534709 926796352 932627455 937990877 942841031 947165174 951020619 954530974 957818209 960909648 963711830…
796015974 794516441 793975253 794482564 796036317 798558862 801929972 806007162 810641851 815704231 821111750 826851652 832979154 839573723 846683165 854315998 862476408 871158953 880276070 889613933 898896752 907893358 916453969 924486464 931957700 938919149 945481620 951736879 957709490 963375877 968698218 973629631 978112977 982104113 985608248 988696904 991483030 994054914 996408996 998448219…
688962326 686974397 685861156 685759583 686729517 688733682 691679117 695458859 699949110 705003033 710493595 716370852 722655345 729369128 736493004 743999629 751906466 760268661 769110800 778368644 787892408 797491859 806979374 816204212 825084749 833610833 841794300 849614122 857019690 863975403 870473425 876495968 881985486 886874122 891154699 894926502 898361705 901603639 904674584 907471297…
706551708 704649651 703618505 703560550 704555954 706624826 709684372 713556890 718041954 723002094 728395436 734238082 740537971 747261770 754365203 761854213 769803578 778293405 787313567 796730544 806341932 815944224 825351636 834404904 843020857 851226373 859095348 866642582 873808483 880544068 886864681 892800914 898329909 903387418 907942484 912041364 915772971 919194465 922288002 924983190…
1030717424 1029992848 1030506442 1032254796 1035103380 1038820178 1043150187 1047876667 1052846194 1057978072 1063269925 1068788448 1074639081 1080929329 1087749701 1095173064 1103234182 1111863828 1120833551 1129800774 1138439968 1146534227 1153959719 1160639773 1166551088 1171748854 1176349050 1180484119 1184272419 1187793298 1191057009 1194005896 1196574786 1198767079 1200673222 1202414035 120…
728175035 725892495 724554683 724340429 725325447 727428153 730455540 734206729 738540137 743370222 748640748 754323755 760427424 766971993 773955202 781368678 789252166 797688547 806705961 816192999 825928058 835673427 845226795 854430430 863199749 871548102 879542117 887221332 894575088 901578119 908206189 914412305 920121430 925272255 929866916 933983015 937737710 941221755 944441598 947315563…
731994625 729961211 728803233 728621541 729483912 731398128 734292668 738031491 742452479 747410928 752819404 758664258 764972069 771745376 778939530 786514868 794499079 802968721 811951694 821349115 830953823 840537602 849922630 858995453 867686888 875953844 883775474 891156985 898127176 904721806 910960812 916832274 922290915 927280946 931781297 935834191 939517116 942882466 945926573 948604589…
721534793 719754242 718880575 719031452 720301889 722698005 726116926 730387264 735337345 740848760 746867447 753373466 760341339 767731241 775519201 783727583 792412726 801614273 811311417 821415281 831781806 842221642 852520233 862493004 872046444 881176090 889897320 898196114 906055385 913496364 920557425 927238243 933490987 939266633 944551907 949362348 953720429 957648795 961167832 964279494…
725329976 723628635 722860952 723158722 724584371 727095652 730573171 734868285 739839661 745384956 751459495 758053543 765141787 772667498 780587327 788921059 797740522 807102158 816983089 827266825 837774349 848304121 858657659 868664639 878221104 887307630 895948609 904148612 911885825 919164684 926037242 932546838 938666678 944318113 949447047 954072366 958268880 962114940 965645180 968831822…
740325873 738680216 738088407 738582141 740120215 742655424 746126202 750415518 755363327 760829466 766739421 773081823 779876954 787143012 794881151 803088920 811778532 820957045 830568911 840463561 850434368 860289304 869881239 879094270 887840805 896087190 903868108 911261968 918343948 925143410 931622579 937693805 943277883 948363234 953011206 957303464 961284953 964945952 968232548 971061128…
648958205 647188399 646318472 646382396 647414469 649435730 652403788 656183355 660586744 665464985 670760457 676469042 682576412 689060393 695941625 703292461 711185847 719642724 728607763 737944872 747460576 756952530 766242325 775184417 783691315 791760976 799438767 806735048 813609943 820042764 826066458 831705280 836913488 841615953 845804169 849567691 853025717 856234238 859155601 861706611…
985920842 985564820 986333408 988219261 991132789 994937893 999487955 1004635686 1010230617 1016146408 1022333564 1028832547 1035713841 1043010410 1050727505 1058905613 1067623933 1076900076 1086585384 1096381294 1105969967 1115130996 1123754510 1131790740 1139219431 1146053394 1152340776 1158153707 1163571649 1168656713 1173424608 1177837765 1181835365 1185377348 1188470743 1191168984 1193549135…
696909005 695207577 694341646 694399176 695440657 697466005 700383230 704040487 708307809 713121302 718452629 724261098 730487207 737082090 744038331 751399993 759238567 767595487 776429376 785618770 795014854 804477278 813858406 822991270 831736880 840044036 847939063 855459144 862613663 869398531 875812175 881842996 887454313 892593808 897222976 901346108 905015576 908299825 911233508 913797332…
594382699 592728680 591915632 592003512 593022412 594960882 597765480 601365145 605687469 610652111 616163584 622117956 628418256 634997339 641845269 649019835 656618699 664718993 673318145 682315225 691543686 700821795 709983623 718898886 727498329 735772274 743716772 751287239 758430333 765151364 771512685 777552635 783221625 788410805 793048740 797174468 800910931 804356392 807504045 810274114…
626832143 625067828 624142646 624209468 625350547 627509108 630533027 634276857 638635466 643509991 648806909 654485349 660566347 667078509 674021856 681399113 689250577 697618379 706469305 715668412 725033478 734405147 743667091 752728176 761511608 769956223 778014782 785657617 792885396 799724129 806191675 812270288 817915841 823092437 827803789 832100546 836053016 839702283 843027934 845959323…
1114355412 1114772133 1116156097 1118499781 1121778178 1125878465 1130606511 1135780707 1141285114 1147039983 1152984989 1159120599 1165523879 1172286671 1179454919 1187035897 1195012145 1203299606 1211715839 1220037718 1228086929 1235733286 1242843887 1249295663 1255054378 1260201815 1264867523 1269155499 1273135580 1276858218 1280337305 1283523959 1286324465 1288664811 1290552539 1292083494 129…
624344934 622427734 621350027 621281549 622290461 624349536 627358905 631168882 635626708 640630969 646138883 652120520 658520633 665274589 672356245 679805267 687708662 696146307 705128609 714561108 724257540 733990075 743545739 752769619 761588083 770001212 778043419 785742135 793108157 800149059 806865724 813221491 819125768 824473907 829224395 833443833 837270479 840819329 844104781 847044314…
635021994 633125093 632127110 632137554 633185405 635227974 638184607 641951739 646388888 651332735 656666056 662372621 668502664 675082656 682080492 689469890 697304554 705684129 714622746 723966445 733459665 742880698 752098688 761035459 769632408 777863892 785741858 793284977 800495847 807368011 813887532 820012663 825669384 830790662 835368913 839470032 843193927 846611975 849727178 852485236…
1009277615 1009166053 1010099231 1012033963 1014916291 1018682096 1023229941 1028409784 1034045737 1039981183 1046122232 1052455289 1059021324 1065867330 1073035767 1080603795 1088681570 1097303712 1106313273 1115392918 1124226771 1132621491 1140495573 1147816434 1154580002 1160821106 1166604243 1171994093 1177034862 1181748099 1186136472 1190179950 1193830820 1197034559 1199780249 1202128329 120…
629470911 627665235 626718060 626760394 627859264 629996458 633074718 636948191 641464947 646502383 651979844 657850788 664090186 670689915 677665308 685065311 692965514 701424194 710417925 719812029 729398392 738965586 748346674 757436248 766193140 774622029 782730850 790500660 797898402 804906736 811528632 817766525 823604730 829011965 833962218 838459059 842537587 846230722 849526395 852365408…
639206220 637461068 636504482 636457731 637404572 639374193 642320544 646122310 650614781 655642035 661102470 666956528 673191652 679788628 686736183 694072113 701882766 710240766 719136259 728458412 738024230 747621468 757055257 766197620 775005760 783477390 791589649 799302550 806612530 813558605 820160955 826383147 832167096 837478893 842311416 846673597 850596780 854128935 857298464 860092859…
656737660 655042281 654234023 654408946 655601705 657773147 660816644 664587967 668943452 673777606 679047384 684760441 690929695 697537540 704545444 711932301 719716664 727937438 736605038 745661729 754981225 764395818 773721143 782782698 791462867 799738079 807654206 815257805 822557525 829537831 836174257 842422471 848216374 853500516 858268097 862569438 866487591 870091684 873387219 876305225…
602701729 600911610 600035833 600191153 601393399 603577001 606629194 610410901 614772639 619590301 624808332 630439796 636505782 642980048 649818377 657043526 664763120 673067840 681913310 691116594 700457192 709759999 718897007 727766485 736308622 744519993 752415512 759979504 767176823 773999944 780467767 786569505 792235439 797381752 801982360 806095145 809822059 813239566 816353031 819104791…
601660332 600099308 599293644 599348545 600325057 602230057 605027191 608637817 612942192 617810610 623146934 628897734 635027672 641511554 648359518 655627165 663376846 671626873 680334332 689398819 698658857 707901016 716913443 725557149 733792061 741640183 749132374 756286992 763119000 769644733 775863938 781738710 787199276 792178226 796647103 800633303 804210165 807457870 810410654 813037195…
616785121 615118948 614202998 614109974 614951499 616815655 619684350 623412592 627785454 632607310 637767815 643255631 649118940 655400229 662102660 669226378 676825596 684986203 693715595 702868706 712200655 721473733 730505194 739167039 747405557 755254474 762778605 769991478 776845840 783296169 789341507 795002994 800276229 805113895 809460258 813315941 816769413 819941581 822881972 825529624…
672565321 670834841 669985947 670068463 671189377 673400625 676615779 680638129 685259807 690360820 695942016 702055008 708685594 715724037 723076928 730794468 739039270 747905313 757292666 766979583 776778320 786573862 796245588 805642994 814667645 823320743 831631421 839577876 847118799 854265443 861056230 867454727 873325510 878546243 883132573 887237562 891036057 894610487 897922735 900870907…
810462720 809258320 809043321 809795684 811523234 814278071 818066292 822765705 828152700 834007179 840199922 846711707 853587976 860866736 868548738 876647458 885239908 894398921 904047626 913932581 923782098 933456237 942916722 952118421 960996817 969513257 977634968 985294283 992430532 999055087 1005225555 1010969053 1016260881 1021057244 1025331365 1029111451 1032497389 1035593824 1038401637 …
662186576 660474532 659707932 659926052 661137086 663350148 666557361 670690117 675594399 681056231 686890682 693033582 699526386 706405100 713650370 721264748 729337234 737975239 747190830 756878634 766866516 776943136 786868122 796432095 805538326 814206060 822489135 830410560 837963467 845127046 851864692 858139354 863948320 869320230 874270533 878788984 882880249 886582059 889918077 892851899…
671452292 669780822 668861858 668854286 669933878 672156891 675409016 679474545 684157359 689362920 695087306 701324868 707986106 714935483 722131933 729704012 737848074 746656862 756061382 765902927 776004426 786173705 796202447 805920397 815258156 824237280 832892535 841213291 849158493 856702644 863839661 870538395 876711510 882249454 887106336 891366675 895216164 898812588 902164871 905146989…
794642300 793534623 793450172 794517778 796805737 800252154 804627246 809629629 815040233 820777818 826856942 833341891 840296670 847719660 855559222 863837896 872705991 882290597 892495880 902992124 913385485 923371843 932768984 941486848 949514808 956919237 963803993 970240961 976240032 981788843 986895764 991575036 995816924 999603925 1002945036 1005880391 1008471270 1010783071 1012832275 1014…
662133480 660178022 659141585 659143651 660237373 662446947 665745969 669969538 674824352 680071776 685693960 691830111 698553824 705760051 713279476 721062622 729228776 737953246 747314151 757213611 767407380 777607573 787585249 797213192 806448843 815297425 823782055 831921896 839713729 847119814 854075677 860523554 866439685 871819735 876657385 880978971 884892602 888540795 891973092 895096117…
746668451 744616240 743603417 743789797 745266369 747947437 751607152 756031859 761100757 766753471 772946002 779632103 786737070 794150055 801788983 809695832 818045700 827019227 836628700 846658960 856791293 866787165 876543505 886002493 895077613 903689796 911825327 919519366 926805418 933707266 940252213 946441833 952203529 957416929 962030366 966141341 969922038 973454917 976662683 979399967…
855181669 853947148 853831618 854864145 856984166 860130917 864267832 869284268 874924417 880911216 887159367 893794219 900933170 908527070 916470414 924789906 933626374 943045574 952928491 963034969 973121856 983004441 992557628 1001692954 1010338751 1018442359 1025993725 1033044052 1039691094 1046027775 1052081603 1057786419 1063013565 1067651894 1071686892 1075218555 1078397473 1081325570 1083…
910682430 909779925 910044551 911397475 913757678 917114940 921446691 926610419 932377320 938565483 945109492 952014144 959286607 966936802 975020263 983632447 992829981 1002558226 1012662175 1022957552 1033278450 1043463225 1053326485 1062688783 1071455977 1079654158 1087371931 1094682008 1101615385 1108159455 1114244447 1119762383 1124639293 1128887462 1132592176 1135882242 1138907015 114177234…
668987128 667018997 666027331 666132839 667342771 669583174 672735253 676682033 681333897 686605822 692391846 698592164 705162375 712113491 719464897 727220521 735393129 744020137 753127693 762679783 772561161 782584652 792510518 802112843 811283854 820063991 828532319 836677241 844408785 851677720 858518166 864957226 870942644 876407335 881368660 885903442 890043455 893762342 897059279 899980728…
658232054 656594072 655875051 656097620 657347267 659681452 663033560 667209036 671970959 677146773 682674537 688561480 694816527 701437955 708453497 715933981 723934940 732417372 741240658 750248883 759351324 768486131 777512567 786203917 794392281 802092939 809447617 816560267 823412540 829912402 835978388 841573299 846689500 851329079 855510846 859296772 862787789 866058106 869083359 871749213…
668565876 667238353 666826018 667342306 668808147 671254558 674638821 678794301 683505675 688625486 694104265 699942632 706153254 712758116 719791981 727303553 735351821 743966096 753069097 762447191 771836091 781041878 789954804 798472014 806488377 813988577 821079258 827879189 834413705 840647069 846559741 852129751 857273377 861884074 865940879 869533585 872773232 875712022 878350844 880676142…
628020403 626517069 625824814 626016011 627191941 629372215 632460230 636306596 640785477 645818538 651347199 657295969 663569950 670094940 676873358 684015273 691700554 700058586 709040425 718405633 727844677 737117023 746098200 754753468 763096262 771141980 778869495 786231609 793205778 799814600 806088639 812021859 817563853 822644123 827210419 831265237 834877656 838155484 841183386 843956147…
876807319 876373991 877078493 878881159 881669943 885336883 889783574 894890659 900551846 906723581 913384103 920451611 927790918 935308453 943027205 951080838 959633302 968753219 978325350 988098471 997836919 1007407529 1016717726 1025622356 1033944584 1041590750 1048624835 1055218251 1061507795 1067480191 1072995031 1077927668 1082275563 1086117524 1089509236 1092466962 1095034530 1097296200 10…
642205341 640494738 639677046 639792862 640894515 642991654 646036469 649951753 654632098 659936277 665733460 671955977 678569759 685516525 692747740 700308043 708319207 716865971 725932171 735437947 745276768 755290909 765255016 774939797 784208641 793041646 801472025 809527404 817229000 824588639 831563615 838045821 843940450 849248299 854057571 858481636 862609841 866463721 869966193 872991153…
615845408 613981406 612961701 612923318 613934222 615974268 618931934 622635975 626927120 631710583 636941651 642585554 648611537 655010179 661795486 668999594 676677123 684888426 693638423 702823913 712253750 721718001 731034530 740061458 748709638 756948245 764776912 772193840 779205488 785850375 792174702 798171101 803757987 808835824 813370672 817428127 821126430 824546758 827676630 830434543…
602270890 600437920 599406888 599323212 600281911 602282580 605226819 608952773 613283430 618077085 623262137 628830745 634797552 641170479 647963740 655222082 663006060 671337289 680153438 689314296 698647239 707986467 717184825 726122765 734732391 743005717 750957437 758575489 765815626 772636783 779023634 784973485 790478119 795528610 800131950 804315752 808116165 811556852 814628747 817289335…
607949226 606105404 605118957 605072288 605994257 607874489 610647038 614178933 618313613 622945005 628048108 633640469 639722262 646253663 653183418 660496372 668231740 676443576 685128418 694188963 703468614 712806440 722049279 731043607 739669291 747893688 755762045 763317911 770545638 777391111 783809561 789774290 795258441 800240527 804737174 808817471 812569562 816041386 819204214 821973616…
804523744 803493965 803390027 804272918 806150694 808967747 812629573 817023167 822016166 827467489 833270580 839395401 845879849 852774210 860101003 867872814 876124205 884880123 894070444 903494913 912893599 922046994 930811717 939104022 946892337 954198047 961070745 967553243 973673829 979455593 984905599 989987328 994621508 998738893 1002345888 1005534097 1008413160 1011027465 1013335799 1015…
651289506 649463305 648489994 648472002 649485039 651534899 654530173 658297622 662649066 667465992 672728287 678456419 684636733 691220123 698183973 705568073 713442352 721844186 730730283 739962714 749341890 758674354 767823013 776706299 785273778 793492387 801340386 808806033 815900453 822661665 829113493 835210817 840849613 845948400 850515757 854639808 858421332 861906891 865063354 867813300…
664917219 663119372 662120304 662027568 662925819 664856610 667778074 671548742 675976571 680901778 686243718 691985521 698126526 704651601 711548176 718849318 726638595 734986552 743871908 753162443 762663194 772178075 781544038 790643740 799412589 807830309 815886570 823550174 830783386 837584418 843990046 850020047 855635608 860775033 865425859 869643952 873501592 877027566 880193644 882945700…
712769261 710632552 709563192 709596545 710722463 712925414 716161409 720309271 725167127 730526598 736272410 742410266 748991804 756026984 763490642 771398938 779832911 788859244 798432359 808379612 818473966 828517879 838372881 847939190 857137521 865921091 874290300 882274887 889893326 897126412 903919085 910198591 915901825 921008344 925558594 929635911 933324091 936674621 939697353 942364273…
707164959 705158169 704189938 704358917 705675135 708058423 711347865 715343656 719863974 724791159 730094804 735817418 742017178 748707942 755857112 763440314 771476471 779984228 788901253 798064965 807281492 816397748 825298624 833868104 841997469 849631968 856781078 863479459 869756508 875640301 881160745 886328976 891119838 895488682 899413657 902924424 906086386 908948003 911496686 913667879…
705422564 703302111 702056716 701883706 702875922 704971784 708008268 711805134 716211646 721124212 726493197 732304778 738543457 745183467 752230268 759758175 767876926 776637130 785961941 795672811 805573806 815496668 825278213 834749305 843788881 852373322 860540867 868314317 875676611 882603442 889086922 895125003 900705054 905806007 910420300 914577625 918337149 921738596 924759298 927331734…
764389927 763009511 762525314 763046183 764649536 767324466 770942891 775290304 780136069 785309069 790749749 796511669 802704036 809413779 816670262 824466763 832784319 841570179 850696969 859964748 869155325 878086007 886627220 894705274 902312076 909501187 916350623 922915132 929201552 935171625 940757654 945883671 950492586 954573918 958176199 961387961 964290086 966908710 969204750 971112369…
659168469 657247585 656219057 656234841 657348568 659492355 662517303 666266924 670633003 675564075 681031170 686987131 693363075 700108095 707226973 714774328 722816413 731392197 740480697 749976756 759696372 769419911 778949563 788155566 796994774 805483491 813634899 821417836 828775241 835668660 842096219 848078053 853630860 858748948 863412192 867627166 871456948 874983711 878225104 881099764…
676637962 674796261 673857450 673924351 675009765 677063832 680003596 683725172 688110822 693046078 698443268 704255534 710467576 717071264 724061343 731467194 739370360 747845937 756863621 766261584 775826707 785382606 794802426 803985940 812860650 821380808 829496204 837145043 844306432 851036876 857418481 863475078 869154319 874376553 879085460 883274010 886991816 890319440 893307776 895939294…
935091732 934427143 934750348 936092820 938473902 941833799 946006104 950777157 955964324 961452159 967196318 973217233 979575552 986331862 993527520 1001201107 1009391416 1018080204 1027119040 1036235711 1045132636 1053582883 1061454106 1068692570 1075311924 1081371426 1086935618 1092056890 1096792780 1101207700 1105336688 1109157271 1112604613 1115609915 1118137914 1120218819 1121952784 1123457…
618571054 616722824 615785111 615841873 616905842 618927496 621813795 625452243 629729064 634539802 639802562 645471800 651532384 657973398 664780206 671967701 679607017 687779939 696484784 705595618 714915500 724249678 733428961 742309915 750797229 758864806 766537157 773849149 780821451 787455401 793734300 799627638 805098933 810118753 814682770 818819544 822570589 825955661 828956352 831532333…
614749346 612900419 611829450 611691363 612553975 614385281 617087088 620542330 624641740 629291022 634418185 639979605 645950366 652307967 659034494 666137483 673659534 681651498 690117123 698967290 708021620 717061106 725900036 734437722 742661686 750596876 758239756 765543419 772467881 779022983 785238006 791096366 796524525 801450968 805867030 809833255 813436466 816730485 819695293 822251774…
599856071 598080225 597115065 597103588 598144161 600248818 603326108 607203956 611689058 616630975 621952637 627638452 633700725 640152992 647011378 654317174 662137718 670512752 679384896 688593911 697947558 707290926 716513900 725526572 734250089 742615338 750557681 758036013 765075064 771763536 778175452 784289353 789994594 795174398 799784244 803872954 807548548 810909625 813974934 816667331…
609521037 607718833 606788576 606873159 608023501 610191090 613257087 617062182 621439937 626263374 631474868 637071901 643071518 649491109 656347873 663659271 671440532 679700399 688425377 697549107 706927972 716354468 725618299 734581177 743204263 751502846 759477993 767095473 774317528 781131430 787538050 793524278 799060802 804128126 808735910 812912980 816686671 820076368 823091672 825719284…
609874553 608051273 607135409 607230552 608348060 610444267 613429216 617164079 621483858 626249693 631392705 636904788 642786389 649021714 655616199 662632404 670156110 678223905 686784773 695706886 704803093 713872755 722755182 731357590 739636520 747563111 755110251 762261317 769016027 775381053 781355745 786927603 792076897 796781972 801029594 804836376 808258683 811358423 814142712 816547942…
1048233826 1047852952 1048601872 1050510474 1053559136 1057646081 1062591277 1068184057 1074238360 1080630461 1087312473 1094303218 1101663588 1109463091 1117746119 1126515643 1135739809 1145353167 1155232057 1165178849 1174957064 1184356280 1193234252 1201520442 1209195411 1216262952 1222740307 1228676655 1234159630 1239270326 1244022497 1248356498 1252198538 1255530092 1258411037 1260942067 126…
758437787 756620759 755716183 755804077 756939179 759123218 762281901 766272939 770927516 776111915 781779362 787962347 794691576 801922138 809563764 817585240 826060172 835090372 844684062 854703138 864914227 875088750 885071361 894781584 904178969 913234288 921912062 930158248 937909489 945128291 951824825 958034716 963782276 969074030 973919355 978347368 982407498 986149622 989580140 992628294…
757169265 755180124 754146897 754175431 755301483 757487584 760644792 764657852 769396875 774727708 780543558 786802082 793519319 800719160 808405277 816586161 825288487 834505418 844137929 854014463 863966953 873870339 883622636 893128365 902316428 911149738 919600723 927631755 935212722 942346734 949061607 955370347 961240595 966608037 971431808 975744897 979644922 983223982 986498298 989400064…
754919298 752758432 751581305 751472852 752463139 754547451 757663722 761666737 766362264 771594891 777306455 783504038 790180810 797289353 804794866 812728191 821163905 830146347 839636415 849511961 859602089 869722262 879692617 889349807 898572700 907311257 915583612 923439050 930923186 938061168 944840388 951194407 957021370 962243569 966866915 970996902 974795326 978388348 981777563 984835488…
778694237 776520413 775308906 775184627 776211390 778351914 781489357 785482717 790200168 795522900 801352012 807627518 814328571 821445283 828969565 836934528 845437558 854566465 864277892 874372579 884604909 894794398 904825637 914592310 923993956 932974933 941525450 949642952 957315963 964539555 971315004 977622854 983415039 988655090 993372607 997672221 1001676755 1005445507 1008931696 101201…
787310318 785277707 784268268 784342332 785484608 787639129 790738692 794696620 799381496 804638587 810363247 816543563 823214279 830378689 837996525 846046437 854574814 863655100 873283970 883318725 893519842 903648551 913528583 923052690 932170671 940870349 949148263 956996923 964423300 971459364 978132386 984424791 990268594 995581236 1000321892 1004534410 1008333930 1011827521 1015031030 1017…
664583639 663174488 662635212 663053812 664510611 667018477 670488871 674766218 679695228 685162658 691094422 697434765 704143182 711214849 718695765 726665723 735194466 744295542 753898556 763854156 773971005 784055842 793930678 803446193 812516829 821144113 829378716 837248631 844731106 851784846 858384983 864523669 870198635 875415394 880194926 884570696 888575933 892231832 895542724 898494441…
658638086 657189106 656616747 656966761 658285442 660594450 663848743 667930651 672687363 677977084 683700858 689818348 696338280 703284330 710674942 718541406 726939013 735900322 745367456 755184593 765156998 775107512 784893074 794407518 803587367 812401386 820826292 828842448 836450983 843672725 850518184 856967012 862981242 868530301 873604457 878222644 882436110 886304254 889841652 892992024…
1001377787 1001218516 1002145700 1004140690 1007161817 1011142067 1015961940 1021446280 1027398320 1033646523 1040084553 1046698727 1053567359 1060817443 1068562775 1076866596 1085729422 1095068923 1104698871 1114357836 1123791061 1132813112 1141303665 1149180701 1156406965 1163011056 1169076551 1174702302 1179969501 1184928796 1189596371 1193952188 1197946886 1201526332 1204668817 1207407531 120…
729767917 727531562 726358372 726327393 727447743 729672773 732902072 736988068 741759278 747063814 752815440 759001646 765639015 772725156 780246062 788224065 796733841 805848258 815555771 825725428 836148368 846609064 856926502 866964659 876642035 885929893 894816869 903274331 911270210 918803499 925893513 932528748 938647593 944186123 949144717 953601429 957654892 961350319 964656817 967510569…
752261030 750220875 749177966 749193419 750281920 752400883 755459664 759344420 763932260 769102147 774765739 780896201 787507419 794600229 802154587 810185457 818770528 827975577 837743423 847879939 858160644 868435528 878623646 888640313 898372453 907720126 916624575 925049065 932962161 940351186 947227170 953597108 959442350 964741915 969516165 973835631 977783032 981410381 984726415 987705887…
999300612 997924846 997685067 998580850 1000543582 1003480859 1007295125 1011874062 1017091879 1022836759 1029033608 1035640849 1042638382 1050025058 1057820733 1066063301 1074793037 1084013862 1093646976 1103527124 1113456499 1123256606 1132773257 1141874692 1150476749 1158548733 1166077136 1173056198 1179532614 1185610186 1191360252 1196741487 1201637786 1205967322 1209745236 1213064088 1216032…
716625873 714591682 713535803 713488795 714443580 716409315 719398320 723351484 728092622 733392716 739095985 745175335 751671538 758611533 766003290 773881740 782315029 791343573 800911447 810858676 820976571 831065413 840951355 850491102 859600668 868274429 876549083 884448228 891972087 899120856 905894313 912263741 918161709 923512088 928279692 932500570 936261423 939638694 942655155 945293759…
720968239 718994718 717958504 717907986 718929752 721073653 724272032 728355108 733142816 738510079 744379439 750691062 757399656 764485218 771953723 779840379 788218705 797170951 806700834 816666462 826821453 836927597 846822017 856406270 865626264 874475188 882977430 891141290 898932084 906295771 913198864 919639167 925620533 931124008 936117738 940605758 944652620 948332693 951650732 954531045…
728829334 726772788 725663390 725572357 726526826 728520135 731504416 735377036 739997259 745239642 751033459 757343958 764124995 771309854 778855658 786790114 795203006 804171055 813669318 823553876 833634855 843750363 853764118 863539805 872972706 882032090 890726879 899037197 906915164 914337151 921308638 927818133 933825067 939303081 944272541 948781508 952866944 956537588 959782146 962587812…
619296996 617607810 616790729 616912461 618017386 620111703 623143113 626994912 631507203 636530724 641983689 647858695 654170259 660904944 668034588 675569191 683572032 692104105 701145526 710564501 720155137 729704682 739040461 748045817 756662959 764887734 772747443 780267359 787446241 794253814 800647678 806594868 812079131 817092153 821631936 825721915 829424337 832811993 835907812 838650806…
631281283 629563932 628660175 628686043 629751726 631881538 634977345 638869105 643395474 648444624 653950259 659876299 666203997 672921312 680026609 687548693 695551019 704091592 713162480 722662081 732415684 742212866 751841681 761134654 770019193 778516464 786668694 794470709 801883292 808892184 815516985 821756698 827551511 832817037 837520063 841723212 845553385 849111403 852395193 855306252…
614711171 612898577 611879237 611785717 612719802 614716201 617722893 621598399 626137439 631140704 636499013 642222341 648380435 655010953 662089988 669588949 677536588 685993555 694954055 704288302 713792627 723278494 732603856 741661152 750388995 758789833 766893564 774696599 782155525 789228824 795894832 802131139 807900060 813161117 817897878 822144267 825984892 829505230 832722497 835570667…
589196388 587345444 586367991 586361024 587356189 589323010 592168092 595767192 600012488 604820135 610106055 615789791 621830072 628235513 635038199 642277951 650008306 658277424 667071959 676280239 685715900 695174409 704478596 713504757 722192033 730523316 738485195 746051654 753215079 760016236 766509519 772683860 778434882 783637640 788252829 792360560 796094160 799539320 802681836 805438391…
621299335 619527977 618596733 618579558 619520256 621435342 624284849 627936074 632197921 636922561 642067769 647655994 653691448 660132782 666941613 674143088 681824074 690057405 698820426 707983807 717363604 726769681 736027546 745005113 753641162 761930727 769872729 777440933 784599761 791327830 797625359 803510649 809002037 814089316 818732329 822905118 826638056 830001691 833043222 835740207…
1008534906 1008002774 1008489785 1010031997 1012609126 1016106168 1020336212 1025113044 1030283245 1035714139 1041320972 1047133632 1053290456 1059925554 1067081168 1074741106 1082887227 1091454705 1100250515 1108984367 1117400804 1125361078 1132812548 1139731196 1146110106 1151971006 1157363593 1162355776 1167017357 1171394524 1175494483 1179293395 1182748123 1185804236 1188424475 1190629521 119…
667316498 665397241 664383765 664380421 665438558 667543266 670616687 674541420 679180405 684392272 690059499 696114889 702529153 709273529 716325413 723728482 731613891 740111198 749223203 758797199 768606107 778434332 788102997 797473116 806465257 815060287 823251102 830999628 838264839 845065713 851479886 857560264 863265410 868487365 873148147 877270380 880963892 884343822 887445158 890203814…
654721508 652807147 651823044 651884983 653057401 655335556 658604238 662649254 667246896 672259833 677655613 683446448 689625392 696167962 703089736 710481336 718460205 727067377 736203407 745665456 755241648 764759447 774059753 782984593 791437641 799434402 807046807 814302899 821168092 827603339 833594623 839129027 844185120 848760252 852889536 856636022 860069393 863234432 866113759 868628887…
670661028 668884976 668034805 668239608 669539133 671880029 675135703 679141444 683742721 688840806 694399050 700401668 706810392 713566964 720638093 728058382 735923834 744318156 753218968 762475665 771885539 781278821 790529478 799530886 808208095 816537689 824513841 832099741 839244559 845941736 852232216 858139085 863623430 868622208 873121074 877176075 880863073 884212254 887192944 889757544…
638563907 636658267 635622158 635552137 636510403 638512516 641486618 645267067 649657981 654517903 659790481 665471631 671565759 678073980 685009950 692411048 700320863 708749296 717641803 726881694 736316084 745781106 755122431 764221308 773013386 781472839 789572942 797271740 804537626 811370493 817782888 823765723 829283555 834306347 838844889 842953911 846697156 850105123 853161030 855819795…
647604182 645659042 644596056 644495915 645377171 647214024 649945906 653475527 657683307 662465959 667762703 673537853 679744853 686327330 693265701 700608627 708436635 716785762 725602781 734757915 744082251 753398600 762545797 771403043 779906189 788042676 795825383 803262813 810345033 817047855 823342087 829199828 834601686 839545218 844049227 848156026 851930186 855431732 858658748 861517161…
648271983 646539745 645680308 645787948 646887511 648945055 651874413 655542229 659791615 664487150 669553334 674976951 680776669 686972465 693580659 700627703 708151714 716168538 724620411 733360795 742200197 750967077 759527767 767777410 775645993 783114028 790203623 796950806 803388031 809534153 815375893 820856815 825900379 830456510 834533573 838194248 841522357 844577520 847357230 849793777…
701006498 698992206 697872378 697780068 698773208 700822290 703845986 707735732 712351568 717543280 723214488 729355881 735990274 743092336 750590516 758450736 766729163 775515736 784823411 794540014 804475370 814427392 824207459 833659729 842707541 851369060 859691219 867671789 875266591 882452061 889236523 895605926 901495155 906836988 911631344 915953106 919893118 923495351 926742072 929583533…
698884286 696844672 695752367 695744976 696889353 699140651 702345516 706311662 710892241 716020441 721688959 727907735 734659903 741876234 749465320 757394118 765732283 774585561 783971661 793769150 803778864 813806494 823684729 833264275 842434540 851156469 859451863 867357506 874899585 882095524 888941285 895384041 901334171 906727379 911570776 915926497 919867335 923447237 926679526 929522490…
696377894 694434408 693424758 693411828 694451661 696579574 699753233 703825390 708591946 713882445 719617841 725794282 732421315 739481015 746946707 754832422 763204973 772124084 781556704 791350205 801288832 811172168 820855745 830257379 839346471 848108520 856503348 864468696 871965781 878996447 885567182 891659603 897250035 902345856 906993689 911257170 915186616 918797775 922065264 924930986…
608014940 606346400 605537395 605660358 606761661 608860718 611907554 615755958 620215234 625148790 630519726 636341224 642600942 649255362 656296185 663792132 671836291 680446899 689523528 698891463 708375575 717834993 727151112 736216733 744959801 753367090 761453501 769200103 776546006 783449071 789922391 795986719 801609958 806725853 811308905 815414677 819150755 822608099 825792527 828606272…
915650230 915230412 915887527 917625294 920377271 924021154 928406172 933399633 938906341 944840609 951108855 957648124 964469182 971638376 979226687 987288683 995855343 1004891030 1014245880 1023682025 1032966968 1041938234 1050491535 1058551556 1066083045 1073108257 1079677351 1085817453 1091524721 1096799758 1101664123 1106127526 1110151063 1113667616 1116655160 1119187645 1121397484 112337368…
901800884 901292979 901799375 903300140 905807077 909313303 913709985 918799955 924386767 930331243 936552640 943029483 949804525 956953854 964539713 972600377 981157484 990183701 999554700 1009060625 1018472952 1027592213 1036258193 1044368723 1051904689 1058905941 1065407504 1071417180 1076955378 1082081328 1086856049 1091290061 1095339763 1098951127 1102108567 1104855396 1107269098 1109401178 …
617678777 615973884 615219784 615464557 616689185 618840702 621859677 625678114 630193807 635270436 640788065 646694981 653000558 659723600 666863955 674423115 682428579 690912467 699855124 709150844 718630635 728117170 737465831 746577572 755393547 763874255 771972928 779635058 786834666 793603360 800005181 806073207 811770555 817015941 821752704 825999592 829836622 833337048 836503976 839266548…
624677777 623007767 622220340 622400772 623591925 625771041 628838998 632649978 637067050 642008221 647454610 653412992 659861565 666735773 673977171 681593022 689652411 698208734 707217906 716531438 725967326 735377352 744644412 753649599 762290839 770538313 778433043 786013683 793267207 800157612 806664866 812768158 818417153 823557768 828185475 832355342 836143025 839601599 842735096 845492951…
657433131 655678635 654786630 654874232 656013891 658217271 661403308 665391625 669960144 674943503 680291799 686040868 692236407 698895140 706027919 713667893 721848849 730555171 739704237 749173350 758826718 768516959 778090020 787419001 796436707 805124261 813469450 821444370 829015766 836158785 842856397 849095339 854866614 860166641 865001630 869397739 873399444 877039529 880306259 883155670…
750969774 749906091 749787890 750669557 752556117 755382751 759020820 763314331 768114889 773309206 778853092 784790938 791217768 798197893 805720898 813740369 822235577 831204208 840585926 850213804 859859400 869319770 878456958 887185948 895469739 903327289 910806782 917930459 924679216 931031223 936984482 942527624 947618145 952218424 956346237 960074708 963486257 966624239 969464626 971923306…
928437590 928048900 928720329 930485272 933273669 936945674 941337898 946305525 951742200 957565530 963700242 970103142 976802125 983882481 991433091 999520907 1008182444 1017367959 1026878912 1036414403 1045710689 1054617209 1063049181 1070934369 1078237160 1084987512 1091248205 1097072954 1102504551 1107573650 1112273044 1116554386 1120370427 1123715994 1126631741 1129185672 1131447393 11334528…
632471683 630936967 630279803 630534411 631717732 633835715 636845829 640630013 645024202 649887234 655149865 660806471 666868056 673331287 680198416 687517132 695369926 703795090 712718272 721978112 731412648 740894943 750290480 759431567 768171695 776451240 784289810 791730390 798807796 805546960 811952614 817992098 823602407 828720926 833314714 837399952 841047436 844351557 847363280 850048813…
824456534 823371634 823422965 824619310 826927124 830284900 834587770 839672048 845330830 851366270 857655405 864192996 871076020 878427876 886324017 894787580 903826740 913417118 923423755 933582527 943604060 953294264 962566677 971373380 979663918 987403774 994601704 1001307539 1007583606 1013470755 1018974348 1024082167 1028794552 1033135817 1037140721 1040834090 1044217867 1047264431 10499143…
692984420 691552127 690981752 691346718 692700338 695049153 698332776 702431361 707204447 712546285 718414754 724801150 731673617 738967314 746639271 754719675 763288568 772389071 781956680 791828549 801818085 811780541 821618449 831253048 840616335 849663793 858366319 866682895 874564928 882000224 889027543 895677694 901907994 907626191 912786976 917445334 921706747 925637814 929225942 932403331…
697571921 696080561 695519424 695975946 697456155 699913629 703282186 707475125 712374066 717849476 723801291 730170581 736915451 743999158 751419274 759242354 767586056 776534361 786044158 795935032 805984195 816026266 825952576 835650900 845003929 853946374 862475153 870595178 878293649 885571788 892455569 898951822 905019669 910606384 915701910 920352029 924627378 928574860 932177923 935360671…
636421300 634486271 633447785 633419187 634428724 636445791 639404016 643203854 647721252 652834522 658448066 664498452 670949198 677783941 685007959 692661394 700818327 709537168 718783430 728402147 738178379 747926803 757526038 766891723 775949564 784640934 792934975 800824304 808318011 815439511 822207028 828594468 834519458 839891104 844677236 848927084 852739105 856206225 859363419 862162607…
862989321 862544898 863203005 865049421 868079682 872169351 877082687 882541060 888313397 894268908 900378331 906695494 913331919 920411136 928021214 936205703 944974434 954271196 963911224 973587923 982979945 991856684 1000095512 1007649026 1014524776 1020768747 1026440475 1031608244 1036357948 1040768075 1044861314 1048598530 1051925595 1054818531 1057297727 1059422233 1061264560 1062865411 106…
657815306 656031336 655150625 655274940 656392891 658428168 661315218 665002958 669399133 674360251 679758982 685543021 691716239 698286603 705259887 712672025 720588800 729051486 738023489 747386250 756970731 766588890 776061140 785254006 794112008 802643808 810863692 818747987 826249262 833336353 840004136 846248244 852040672 857332407 862088337 866337293 870185971 873753104 877065347 880023323…
632676097 630826680 629856471 629874621 630949475 633057869 636084276 639885039 644342500 649365318 654871473 660793594 667096868 673785582 680895135 688476774 696577352 705212679 714337499 723828059 733497155 743139095 752579394 761711358 770510964 779012381 787243275 795168861 802699737 809752407 816297661 822355212 827949795 833076376 837716514 841897889 845721896 849294847 852618047 855573040…
646709635 644856413 643812906 643725901 644697184 646720244 649693792 653480959 657948940 662982829 668495763 674428775 680733786 687369313 694329918 701675200 709507140 717894252 726799980 736078784 745542821 755031342 764422318 773609267 782503127 791055906 799255907 807093469 814546051 821595174 828235337 834453027 840204439 845428480 850095272 854249854 858001626 861453206 864628429 867469146…
675073023 673358165 672470658 672542398 673663238 675825156 678923199 682792671 687256330 692182354 697529704 703325397 709578123 716230560 723220273 730569554 738380077 746737678 755635306 764965413 774545423 784151725 793575066 802682005 811433337 819845215 827933138 835680845 843042981 849969282 856431534 862432390 867987866 873104046 877781031 882044874 885959877 889581722 892890452 895791366…
678323764 676366444 675354439 675382039 676477711 678600918 681658134 685521357 690040289 695076054 700555650 706484064 712879188 719703897 726893025 734447650 742465767 751050819 760193113 769748110 779511198 789287900 798906605 808222886 817157320 825717062 833945703 841849149 849387724 856529986 863277132 869620873 875505102 880861356 885683801 890049926 894058351 897752165 901099458 904028997…
685970392 684030588 683067974 683162995 684329326 686523025 689641463 693541106 698073710 703118010 708599022 714495249 720824081 727608266 734853593 742560440 750750292 759459425 768676457 778273812 788017335 797658757 807018388 816000617 824584337 832817127 840771245 848464142 855833464 862798896 869320866 875392103 881013137 886200994 890995776 895434246 899524937 903249203 906564002 909404401…
689236734 687336884 686372664 686449743 687574056 689695564 692734049 696574404 701076903 706123475 711658364 717674247 724154507 731039311 738265333 745842391 753871030 762455071 771581090 781085429 790739015 800355253 809820262 819055543 827992288 836583110 844810079 852668685 860153467 867258741 873976091 880282010 886135394 891497197 896359221 900757843 904755247 908394249 911662257 914500013…
665489599 663534490 662464931 662376702 663338435 665369330 668426948 672393235 677083976 682325289 688042408 694245023 700919381 707980574 715358127 723092895 731309361 740096368 749426238 759167699 769142772 779164609 789048755 798632942 807817754 816584853 824957426 832945067 840538681 847740655 854561543 860979551 866931209 872359253 877261596 881690743 885715875 889379948 892670484 895527469…
872712431 871624435 871583114 872639533 874802804 878011317 882131910 886989719 892398011 898193374 904286519 910686998 917458437 924647877 932275179 940377305 949012978 958191874 967809795 977668994 987553340 997273819 1006661744 1015561586 1023860626 1031524305 1038591093 1045134241 1051231767 1056953462 1062338746 1067366012 1071957020 1076037508 1079608259 1082761192 1085624514 1088277660 109…
708555573 706594689 705564534 705538131 706557757 708640802 711733314 715681028 720283790 725397966 730989844 737095315 743732237 750849996 758363800 766239256 774534418 783340254 792669658 802406874 812357924 822328738 832151672 841676112 850784843 859434387 867657780 875507381 882991564 890065809 896673972 902787162 908407250 913551576 918251084 922562971 926564336 930303195 933738427 936742152…
693336714 691094848 689774449 689468543 690207627 691991725 694786213 698485543 702910857 707881963 713309895 719209706 725613901 732493614 739791476 747517121 755763557 764605407 773992607 783751310 793670261 803570175 813307704 822757342 831819673 840440533 848609546 856351452 863725791 870802928 877600631 884043826 890007098 895398972 900206246 904484707 908327091 911811775 914942079 917639818…
713421589 711196193 709878888 709600862 710420540 712317417 715214039 718997261 723531065 728682819 734359195 740514037 747117426 754127293 761505588 769267223 777499963 786302693 795675175 805471344 815471451 825481945 835350275 844927340 854084968 862777591 871040925 878914175 886389144 893437809 900050975 906226879 911944052 917172514 921908367 926182482 930035393 933488968 936537075 939160129…
1227080486 1226303989 1226488297 1227666724 1229840771 1232936684 1236815897 1241320852 1246296891 1251596917 1257117457 1262852066 1268886053 1275314252 1282169509 1289436102 1297096799 1305115961 1313371559 1321645583 1329705096 1337375569 1344535781 1351093538 1357009169 1362325950 1367148956 1371598272 1375779513 1379757258 1383520461 1386981890 1390036471 1392633829 1394808480 1396657130 139…
610201607 608422950 607491251 607513596 608522315 610482555 613318752 616935955 621225840 626078037 631406191 637161590 643315514 649838868 656715595 663977353 671710146 680005187 688880288 698230156 707840300 717446619 726806026 735764647 744301518 752497373 760426779 768071898 775349113 782203231 788644573 794693024 800317863 805458761 810103501 814325986 818235338 821887502 825242297 828191572…
931077885 930694794 931433307 933343579 936421363 940534572 945424442 950811238 956495296 962372793 968413101 974664009 981259843 988380948 996186234 1004768614 1014123185 1024098216 1034367092 1044491788 1054066412 1062836934 1070717596 1077727285 1083920212 1089357804 1094126283 1098368470 1102272166 1105989048 1109544395 1112832631 1115716329 1118142506 1120177071 1121941414 1123517740 1124897…
630706985 628902017 627965875 628001288 629054862 631115588 634117912 637939877 642415512 647386583 652765512 658540355 664712116 671253477 678155970 685494956 693398230 701932556 711029323 720508318 730148573 739747923 749160027 758305613 767149846 775664491 783812712 791565545 798919104 805884044 812457546 818611066 824306419 829519264 834248705 838517108 842367954 845850359 848986149 851750865…
596568527 594535365 593286081 592969472 593672015 595390556 598057664 601569754 605794339 610588312 615839160 621490075 627523673 633933872 640724141 647925853 655598201 663787233 672468253 681524784 690785137 700075049 709241612 718162674 726768774 735049451 743010597 750624129 757835060 764611492 770964111 776910883 782436287 787493737 792046392 796106673 799740445 803029053 806013748 808666707…
591714934 589758578 588693174 588621880 589571229 591513411 594370609 598012326 602288575 607087113 612354491 618066577 624197101 630718650 637623570 644942665 652742323 661076345 669909284 679088470 688405908 697681085 706782634 715611574 724109113 732272708 740128550 747679922 754892382 761722445 768144873 774149294 779714960 784795412 789344139 793369824 796956779 800207123 803154756 805747036…
894326564 893372127 893433880 894600772 896897253 900215610 904332818 909036623 914222392 919856416 925886651 932239616 938895697 945919132 953399535 961387738 969882231 978825049 988079130 997435389 1006673753 1015616872 1024131490 1032119354 1039533673 1046384026 1052705042 1058529872 1063893322 1068833000 1073373592 1077519302 1081257437 1084556608 1087379018 1089727461 1091678223 1093337195 1…
1013136884 1013250541 1014230722 1016058607 1018694819 1022096267 1026232264 1031058717 1036471115 1042323378 1048513979 1055033063 1061906808 1069106493 1076544095 1084176401 1092073362 1100305773 1108757650 1117133446 1125184937 1132851702 1140139670 1146968104 1153229519 1158929887 1164165523 1168995055 1173417094 1177438806 1181068436 1184247018 1186885385 1189004386 1190779504 1192406228 119…
650059299 648446980 647790469 648182978 649614596 651982346 655139265 658937450 663269072 668104393 673475662 679395120 685796619 692578191 699690998 707168496 715083282 723491042 732387935 741680590 751190817 760699987 769990866 778873471 787234707 795097468 802598355 809866943 816924325 823692741 830062761 835931153 841218117 845904658 850059898 853805843 857240769 860390571 863216980 865659325…
965178806 964668680 965054527 966346056 968592321 971852269 976075447 981043210 986470704 992169480 998099405 1004295756 1010791233 1017601070 1024742880 1032249747 1040158051 1048467345 1057095790 1065868104 1074547957 1082898989 1090750749 1098040026 1104800642 1111105322 1117001599 1122492975 1127578756 1132299030 1136714319 1140833069 1144578718 1147839505 1150549668 1152745986 1154574273 115…
585861131 584007392 582917808 582730267 583554380 585421798 588252842 591874313 596091014 600768823 605866346 611392891 617341986 623672905 630356805 637429222 644979472 653072321 661670312 670625615 679737634 688816218 697711719 706322463 714595433 722515269 730082611 737300738 744180282 750746778 757026338 763004185 768593262 773668671 778162352 782123720 785671132 788886487 791767869 794270137…
607209217 605440600 604567816 604715302 605943150 608240898 611503288 615528605 620087221 625020708 630283118 635903111 641923951 648372159 655260520 662609252 670455376 678817854 687638233 696771516 706049239 715333439 724499619 733406091 741922501 749982186 757586442 764770244 771578264 778049849 784192391 789963538 795290156 800111698 804418688 808268382 811759937 814965312 817865638 820367180…
571782247 569876225 568805290 568702921 569625412 571544483 574353177 577896441 582015327 586582552 591521398 596808979 602462017 608512473 614993514 621943167 629404778 637400907 645890904 654753997 663821568 672925956 681917542 690658673 699041357 707025156 714637420 721917947 728863292 735424442 741550191 747227811 752479621 757319190 761724978 765678911 769223869 772446731 775391243 778015062…
623938234 622066989 621155791 621251726 622355556 624456723 627511707 631408383 635983247 641088671 646646141 652640017 659067111 665899637 673105828 680703461 688769163 697369264 706475008 715948967 725607298 735284771 744850466 754196190 763239178 771933474 780260682 788208158 795767913 802950839 809773755 816212634 822177445 827556810 832304533 836487964 840250043 843715377 846916589 849794816…
630152235 628241132 627192328 627173155 628237655 630330235 633363303 637257220 641906612 647160941 652872679 658951566 665362161 672095006 679169896 686660840 694681016 703306012 712491792 722063306 731785386 741453194 750936575 760170634 769125543 777781019 786113340 794097222 801714234 808948322 815765154 822102568 827896743 833126857 837834165 842097945 845994090 849565277 852805546 855660843…
611212609 609167603 607979412 607820818 608802162 610905698 614001957 617916479 622478717 627548395 633039409 638923530 645199524 651864776 658924865 666415637 674393244 682893469 691895338 701309909 710990258 720751710 730398937 739763966 748746752 757327567 765533892 773392532 780910644 788083291 794892058 801288511 807194923 812541115 817313016 821571979 825425813 828967489 832222533 835145049…
721630124 719746479 718786759 718879949 720119905 722532335 726044466 730480187 735612806 741263647 747363592 753918651 760929925 768363967 776194463 784450381 793208278 802526382 812370258 822593781 832994487 843386517 853623606 863586177 873193281 882432075 891339491 899934622 908179146 916003803 923350513 930178838 936450216 942128272 947205759 951736565 955835021 959619249 963131594 966311575…
715967216 714026733 713021087 713067812 714240008 716536959 719878594 724121890 729095197 734647674 740693112 747212403 754205548 761643240 769479976 777714744 786415130 795658874 805445921 815664784 826131369 836650014 847050216 857200457 867018425 876471379 885551750 894245205 902524016 910362953 917744210 924642985 931023303 936861552 942172619 947005438 951411249 955416739 959021148 962208488…
719544446 717546933 716518173 716576509 717776412 720110966 723503735 727804581 732828829 738429300 744530971 751095929 758076284 765420032 773115134 781212912 789804661 798963613 808681925 818847932 829286501 839817535 850274179 860498684 870367208 879822208 888855868 897465478 905646495 913413938 920785925 927731302 934158630 939978115 945174228 949820828 954038810 957934238 961545229 964824032…
